# Supplementary material
Source: publisher figshare collection journal article supplement (https://gsajournals.figshare.com/ndownloader/files/27005582)
Supplement: Supplementary file 1 [file 27005582]

## Sheet: gene list
Table S4: Interactome analysis - The UPRmtome
	Members fo the GO term GO:0034514, mitochondrial unfolded protein response
	gene name	primaryIdentifier	secondaryIdentifier	uniProt	human ortholog	UniProt
1	pop-1	WBGene00004077	W10C8.2	Q10666	LEF1, TCF7, TCF7L2	Q9UJU2, P36402, Q9NQB0
2	lin-65	WBGene00022149	Y71G12B.9	Q95XN0, Q8IU04, Q4VNJ8, W6RTP0	n.a.	n.a.
3	ubl-5	WBGene00006726	F46F11.4	P91302	UBL5	Q9BZL1
4	sphk-1	WBGene00007918	C34C6.5	Q18425	SPHK1, SPHK2	Q9NYA1, Q9NRA0
5	mig-1, CNT-1	WBGene00003238	Y34D9B.1	G5EF44	FZD4	Q9ULV1
6	mig-14	WBGene00003246	R06B9.6	Q7YWX7	WLS	Q5T9L3
7	hsp-6	WBGene00002010	C37H5.8	P11141	HSPA9	P38646
8	dve-1	WBGene00022861	ZK1193.5	Q86MI0	SATB1	Q01826
9	haf-1	WBGene00001811	C30H6.6	O45278	ABCB10	Q9NRK6
10	clpp-1	WBGene00014172	ZK970.2	Q27539	CLPP	Q16740
11	hsp-60	WBGene00002025	Y22D7AL.5	P50140	HSPD1	P10809
12	gcn-2	WBGene00013591	Y81G3A.3	D0Z5N4	EIF2AK4	Q9P2K8
13	atfs-1	WBGene00013878	ZC376.7	Q23272	ATF4, ATF5	P18848, Q9Y2D1
14	jmjd-1.2	WBGene00017920	F29B9.2	Q9GYI0	KDM7A	Q6ZMT4
15	bar-1	WBGene00000238	C54D1.6	Q18825	JUP, CTNNB1	P14923, P35222
16	egl-20	WBGene00001188	W08D2.1	G5EG05	WNT16	Q9UBV4
	1	Duplications were tried to be avoided, so if an interaction was found in a previous DB, it was not listed any more.
	2	in the tab "UPRmtOme direct interactions" are interactions listed, which were found with a search for the gene name in three different DB - Mentha, BioGrid and IntAct.
		The gene symbol was input as the search object and the results are listed in the tab. Whereever a secondary identfier was given, a more general gene symbol was looked for. If one was found, it was replaced.
	3	In the tab 'UPRmtOme human orthologs' a second search was done with the same three DBs.
		the columns in the human orthologs are similar to the the direct interctions. The protein A|B and Gene A|B are interaction identified for the human gene.
		in the cel A|B columns are the converted C. elegans homologs listed.
	4	combines the two interactions lists 'UPRmtOme direct interactions' and 'UPRmtOme human orthologs' into one and was used to upload the data to cytoscape.
	5-6	contains each the interactions of the genes in the UPRmtOme and the screening results for both the direct interactions (5) and over the human orthologs (6).

## Sheet: UPRmt-Ome direct interactions
Mentha
BioGrid
STRING
IntAct
		pop-1					lin-65					ubl-5					sphk-1					mig-1					mig-14					hsp-6					dve-1					haf-1					clpp-1
		Protein A	Gene A	Protein B	Gene B		Protein A	Gene A	Protein B	Gene B		Protein A	Gene A	Protein B	Gene B		Protein A	Gene A	Protein B	Gene B		Protein A	Gene A	Protein B	Gene B		Protein A	Gene A	Protein B	Gene B		Protein A	Gene A	Protein B	Gene B		Protein A	Gene A	Protein B	Gene B		Protein A	Gene A	Protein B	Gene B		Protein A	Gene A	Protein B
		O45007	pop-1	O17670	EYA-1		Q4VNJ8	lin-65	O76572	EPHX-1		P91302	ubl-5	Q86G90	NPP-9												Q7YWX7	mig-14	Q18788	mans-2		P11141	hsp-6	Q11184	LET-756		Q86MI0	DVE-1	Q9U2R6	NHR-91							Q27539	clpp-1	O61709
		O45007	pop-1	Q9XVA3	Q9XVA3		Q4VNJ8	lin-65	P03949	ABL-1		P91302	ubl-5	Q20660	HSP-17												Q7YWX7	mig-14	O44411	nog-1		P11141	hsp-6	G5ECG0	TAC-1		Q86MI0	DVE-1	Q86MI0	DVE-1							Q27539	clpp-1	E9RKC7
		Q10666	pop-1	P34545	CBP-1		Q95XN0	lin-65	G5EGG0	USO-1		P91302	ubl-5	Q19416	DYLT-1												Q7YWX7	mig-14	Q18025	C15H9.4		P11141	hsp-6	P27604	ahcy-1		Q86MI0	DVE-1	G5EBR5	somi-1
		Q10666	pop-1	O17761	ECH-8		Q4VNJ8	lin-65	G5EE56	SRC-1		P91302	ubl-5	Q95XR1	TBCA-1												Q7YWX7	mig-14	O44411	NOG-1		P11141	hsp-6	Q18421	C34C12.8		Q86MI0	DVE-1	Q10669	Sur-2
		Q10666	pop-1	P17486	EGL-5		Q4VNJ8	lin-65	G5ED33	EPS-8																	Q7YWX7	mig-14	Q18788	Q18788		P11141	hsp-6	P43509	cpr-5		Q86MI0	DVE-1	G5EDU4	Eor-1
		Q10666	pop-1	P17139	EMB-9		Q4VNJ8	lin-65	Q19253	TOCA-1																	Q7YWX7	mig-14	P91857	RAB-5		P11141	hsp-6	Q8TA83	dnj-10		Q86MI0	DVE-1	G5EE70	Eor-2
		Q10666	pop-1	O17670	EYA-1		Q9U2T9	lin-65	Q4VNJ8	LIN-65																	Q7YWX7	mig-14	Q18025	C15H9.4		P11141	hsp-6	P29691	eef-2
		Q10666	pop-1	G5EBJ7	FBP-1		Q8I103	lin-65	Q4VNJ8	LIN-65																	Q7YWX7	mig-14	Q22866	LEV-11		P11141	hsp-6	Q27527	enol-1
		Q10666	pop-1	G5EBX2	G5EBX2		Q4VNJ8	lin-65	Q09989	SDPN-1																						P11141	hsp-6	P34382	far-1
		Q10666	pop-1	H2KYH4	HAM-2		Q8IU04	lin-65	P03949	ABL-1																						P11141	hsp-6	P34383	far-2
		Q10666	pop-1	O17695	HDA-1		Q4VNJ8	lin-65	G5EC72	ALP-1																						P11141	hsp-6	Q23621	gdh-1
		Q10666	pop-1	P34684	LIN-39		Q4VNJ8	lin-65	G5ECK4	G5ECK4																						P11141	hsp-6	Q09580	gmps-1
		Q10666	pop-1	O18214	MAB-3		Q95XN0	lin-65	Q9XU77	Q9XU77																						P11141	hsp-6	Q9NAB4	gst-26
		Q10666	pop-1	Q09565	NHR-20		Q4VNJ8	lin-65	G5ECK4	g5eck4_caeel																						P11141	hsp-6	P91253	gst-7
		Q10666	pop-1	O44719	O44719		Q4VNJ8	lin-65	O62079	C25F9.5																						P11141	hsp-6	Q21351	gtbp-1
		Q10666	pop-1	O62203	O62203																											P11141	hsp-6	Q05036	hsp-110
		Q10666	pop-1	P41932	PAR-5																											P11141	hsp-6	D5MCN2	larp-1
		Q10666	pop-1	Q93616	LSY-22																											P11141	hsp-6	Q11184	let-756
		Q10666	pop-1	Q95ZK7	GLD-3																											P11141	hsp-6	O44441	mai-2
		Q10666	pop-1	Q17979	Q17979																											P11141	hsp-6	O18000	pes-9
		Q10666	pop-1	Q23079	Q23079																											P11141	hsp-6	O17680	sams-1
		Q10666	pop-1	Q86G90	NPP-9																											P11141	hsp-6	O02161	tin-44
		Q10666	pop-1	Q95QR2	NHR-46																											P11141	hsp-6	G5ECG0	tac-1
		Q10666	pop-1	Q9TXN8	DMD-8																											P11141	hsp-6	P50140	hsp-60
		Q10666	pop-1	Q9TYL9	Q9TYL9																											P11141	hsp-6	Q966I7	K08D12.3
		Q10666	pop-1	Q9U9Y8	LIT-1																											P11141	hsp-6	Q22100	kat-1
		Q10666	pop-1	Q9XVA3	Q9XVA3																											P11141	hsp-6	P21137	kin-1
		Q10666	pop-1	Q9XVI2	SYS-1																											P11141	hsp-6	Q95XN2	mppa-1
		Q10666	pop-1	Q18056	HLH-27																											P11141	hsp-6	P91917	ola-1
		Q10666	pop-1	Q19418	ZTF-2																											P11141	hsp-6	Q9N585	ppw-2
		Q10666	pop-1	Q22289	TBX-9																											P11141	hsp-6	Q21215	rack-1
		Q10666	pop-1	Q22866	LEV-11																											P11141	hsp-6	P49196	rps-12
		Q10666	pop-1	Q7JNM3	REF-2																											P11141	hsp-6	P49197	rps-21
		Q10666	pop-1	Q18825	BAR-1																											P11141	hsp-6	Q95Y04	rps-28
		Q10666	pop-1	Q20422	Q20422																											P11141	hsp-6	Q18678	sars-1
		Q10666	pop-1	Q19503	CEH-40																											P11141	hsp-6	Q09508	sdha-1
		Q10666	pop-1	Q10953	WRM-1																											P11141	hsp-6	Q9N3T5	spg-7
		Q10666	pop-1	Q94398	CEH-8																											P11141	hsp-6	Q22562	T19B10.2
		Q10666	pop-1	Q20257	TBX-11																											P11141	hsp-6	Q21770	wago-1
		Q10666	pop-1	Q21648	Q21648																											P11141	hsp-6	Q965Q1	Y22D7AL.10
		Q10666	pop-1	Q9U1R1	CEH-51																											P11141	hsp-6	Q65XX4	Y47G6A.15
		Q10666	pop-1	Q9NAH2	TBX-34																											P11141	hsp-6	Q9XWK2	Y54E5A.5
		Q10666	pop-1	Q18694	UNC-130																											P11141	hsp-6	Q23642	ZK856.7
		Q10666	pop-1	Q10666	POP-1
		Q10666	pop-1	Q9XVD5	TBX-38
		Q10666	pop-1	Q9N4L2	CEH-45
		Q10666	pop-1	Q9N5D6	UNC-62
		Q10666	pop-1	Q9NA56	TBX-39
		Q10666	pop-1	Q9NAE4	ZIP-7
		Q10666	pop-1	H2KZ82	PQN-21
		Q10666	pop-1	O61708	PQN-59
		Q10666	pop-1	P34708	TRA-1
		Q10666	pop-1	O02482	UNC-37
		Q10666	pop-1	G5EE68	UNC-75
		Q10666	pop-1	G5EGG0	USO-1
		Q10666	pop-1	Q18825	bar-1
		Q10666	pop-1	Q17979	C14C11.2
		Q10666	pop-1	P34545	cbp-1
		Q10666	pop-1	Q19503	ceh-40
		Q10666	pop-1	Q9N4L2	ceh-45
		Q10666	pop-1	Q9TYL9	copb-1
		Q10666	pop-1	O17761	ech-8
		Q10666	pop-1	P17486	egl-5
		Q10666	pop-1	P17139	emb-9
		Q10666	pop-1	O17670	eya-1
		Q10666	pop-1	O62203	F32B4.4
		Q10666	pop-1	Q20422	F45D3.2
		Q10666	pop-1	G5EBJ7	fbp-1
		Q10666	pop-1	Q95ZK7	gld-3
		Q10666	pop-1	O17695	hda-1
		Q10666	pop-1	Q22866	lev-11
		Q10666	pop-1	Q19345	nhr-25
		Q10666	pop-1	Q21021	npp-9
		Q10666	pop-1	P41932	par-5
		Q10666	pop-1	O17670	eya-1
		Q10666	pop-1	Q9XVA3	F08G2.5
		Q10666	pop-1	G5EDT1	lin-35
		Q10666	pop-1	Q09990	lin-23
		Q10666	pop-1	Q9XVI2	sys-1
		Q10666	pop-1	P17486	egl-5
		Q10666	pop-1	Q10666	pop-1
		Q10666	pop-1	Q9U9Y8	lit-1
		Q10666	pop-1	P34545	cbp-1
		Q10666	pop-1	O62090	pry-1
		Q10666	pop-1	O17695	hda-1
		Q10666	pop-1	Q11184	let-756
		Q10666	pop-1	P29355	sem-5
		Q10666	pop-1	Q18825	bar-1
		Q10666	pop-1	P13508	glp-1
		Q10666	pop-1	Q10656	egl-15
		Q10666	pop-1	Q9N5D3	sos-1
		Q10666	pop-1	Q968Y9	daf-2
		Q10666	pop-1	P22981	let-60
		Q10666	pop-1	Q10459	mom-2
		Q10666	pop-1	Q9NAH2	tbx-34
		Q10666	pop-1	Q9NAE4	zip-7
		Q10666	pop-1	O18214	mab-3
		Q10666	pop-1	Q9U1R1	ceh-51
		Q10666	pop-1	Q94398	ceh-8
		Q10666	pop-1	G5EF29	pqn-21
		Q10666	pop-1	O61708	pqn-59
		Q10666	pop-1	Q21648	R02F2.5
		Q10666	pop-1	G5EBX2	R07B7.2
		Q10666	pop-1	Q94178	ref-2
		Q10666	pop-1	Q9XVI2	sys-1
		Q10666	pop-1	Q20257	tbx-11
		Q10666	pop-1	Q9XVD5	tbx-38
		Q10666	pop-1	Q18694	unc-130
		Q10666	pop-1	O02482	unc-37
		Q10666	pop-1	G5EE68	unc-75
		Q10666	pop-1	G5EGG0	uso-1
		Q10666	pop-1	Q10953	wrm-1
		Q10666	pop-1	Q23079	ZC317.7
[truncated: 25 more columns]

## Sheet: UPRmt-Ome genes human orthologs
Mentha		source of Orthology used:
BioGrid		UniProt
STRING		BiomaRt
IntAct		OrthoList DB
no C. elegans homologs			LEF1							TCF7							TCF7L2							UBL5							SPHK1							SPHK2							FZD4
		index	Protein A	Gene A	cel A	Protein B	Gene B	Cel B		Protein A	Gene A	cel A	Protein B	Gene B	Cel B		Protein A	Gene A	cel A	Protein B	Gene B	Cel B		Protein A	Gene A	cel A	Protein B	Gene B	Cel B		Protein A	Gene A	cel A	Protein B	Gene B	Cel B		Protein A	Gene A	cel A	Protein B	Gene B	Cel B		Protein A	Gene A	cel A	Protein B	Gene B
		1	P47902	CDX1	pal-1	Q9UJU2	LEF1	pop-1		P36402	TCF7	pop-1	P35222	CTNNB1	hmp-2		Q9NQB0	TCF7L2	pop-1	Q08117	AES	AES		Q9BZL1	UBL5	ubl-5	Q08117	AES	AES		Q9NYA1	SPHK1	sphk-1	Q13085	ACACA	ACACA		Q9NRA0	SPHK2	sphk-1	Q9P2P5	HECW2	hecw-1		Q9ULV1	FZD4	mig-1	P46379	BAG6
		2	Q92793	CREBBP	cbp-1	Q9UJU2	LEF1	pop-1		P36402	TCF7	pop-1	P11274	BCR	T04C9.1		Q9NQB0	TCF7L2	pop-1	P10275	AR	AR		Q9BZL1	UBL5	ubl-5	P14373	TRIM27	B0281.8		Q9NYA1	SPHK1	sphk-1	P60709	ACTB	act-3		Q9NRA0	SPHK2	sphk-1	P68431	HIST1H3J	his-74		Q9ULV1	FZD4	mig-1	P78352	DLG4
		3	P35222	CTNNB1	hmp-2	Q9UJU2	LEF1	pop-1		P36402	TCF7	pop-1	O75177	SS18L1	ZK973.9		Q9NQB0	TCF7L2	pop-1	P0C853	BAALC-AS	BAALC-AS		Q9BZL1	UBL5	ubl-5	Q8N7W2	BEND7	BEND7		Q9NYA1	SPHK1	sphk-1	P63261	ACTG1	act-3		Q9NRA0	SPHK2	sphk-1	Q14192	FHL2	lim-9		Q9ULV1	FZD4	mig-1	Q6UXH1	CRELD2
		4	Q9NQB0	TCF7L2	pop-1	Q9UJU2	LEF1	pop-1		Q13015	MLLT11	MLLT11	P36402	TCF7	pop-1		Q9NQB0	TCF7L2	pop-1	P98170	XIAP	bir-2		Q9BZL1	UBL5	ubl-5	Q9NQY0	BIN3	BIN3		Q9NYA1	SPHK1	sphk-1	Q9BQI0	AIF1L	AIF1L		Q9NRA0	SPHK2	sphk-1	P07948	LYN	LYN		Q9ULV1	FZD4	mig-1	Q00604	NDP
		5	Q9UBE8	NLK	lit-1	Q9UJU2	LEF1	pop-1		Q13761	RUNX3	rnt-1	P36402	TCF7	pop-1		Q9NQB0	TCF7L2	pop-1	O43741	PRKAB2	C01F6.2		Q9BZL1	UBL5	ubl-5	Q9BXJ1	C1QTNF1	C1QTNF1		Q9NYA1	SPHK1	sphk-1	O15145	ARPC3	arx-5		Q9NRA0	SPHK2	sphk-1	P51151	RAB9A	RAB9A		Q9ULV1	FZD4	mig-1	Q9UPQ7	PDZRN3
		6	P10242	MYB	MYB	Q9UJU2	LEF1	pop-1		Q15038	DAZAP2	DAZAP2	P36402	TCF7	pop-1		Q9NQB0	TCF7L2	pop-1	Q9NP55	BPIFA1	C06G1.1		Q9BZL1	UBL5	ubl-5	A0A1B0GWI1	CCDC196	CCDC196		Q9NYA1	SPHK1	sphk-1	Q9BPX5	ARPC5L	arx-7		Q9NRA0	SPHK2	sphk-1	P06241	FYN	src-1		Q9ULV1	FZD4	mig-1	P20339	RAB5A
		7	Q04724	TLE1	unc-37	Q9UJU2	LEF1	pop-1		Q13015	TCF7	pop-1	Q9UBE8	NLK	lit-1		Q9NQB0	TCF7L2	pop-1	A8MQ03	C9ORF169	C9ORF169		Q9BZL1	UBL5	ubl-5	Q9BUN5	CCDC28B	CCDC28B		Q9NYA1	SPHK1	sphk-1	Q14766	LTBP1	B0393.5		Q9NRA0	SPHK2	sphk-1	Q9NUN7	ACER3	ACER3		Q9ULV1	FZD4	mig-1	O95859	TSPAN12
		8	Q04725	TLE2	unc-37	Q9UJU2	LEF1	pop-1		Q13015	TCF7	pop-1	Q04724	TLE1	unc-37		Q9NQB0	TCF7L2	pop-1	Q09472	EP300	cbp-2		Q9BZL1	UBL5	ubl-5	P46109	CRKL	ced-2		Q9NYA1	SPHK1	sphk-1	Q13489	BIRC3	bir-2		Q9NRA0	SPHK2	sphk-1	Q9NR71	ASAH2	ASAH2		Q9ULV1	FZD4	mig-1	Q9ULT6	ZNRF3
		9	Q09472	EP300	cbp-2	Q9UJU2	LEF1	pop-1		Q13015	TCF7	pop-1	Q04725	TLE2	unc-37		Q9NQB0	TCF7L2	pop-1	Q6P1J9	CDC73	cdc-73		Q9BZL1	UBL5	ubl-5	P49639	HOXA1	ceh-13		Q9NYA1	SPHK1	sphk-1	Q13501	SQSTM1	C06G3.6		Q9NRA0	SPHK2	sphk-1	O14495	PPAP2B	PPAP2B		Q9ULV1	FZD4	mig-1		ARRB2
		10	Q13547	HDAC1	hda-4	Q9UJU2	LEF1	pop-1		Q13015	TCF7	pop-1	Q09472	EP300	cbp-2		Q9NQB0	TCF7L2	pop-1	P12956	XRCC6	cku-70		Q9BZL1	UBL5	ubl-5	Q9UBX0	HESX1	ceh-54		Q9NYA1	SPHK1	sphk-1	Q09472	EP300	cbp-2		Q9NRA0	SPHK2	sphk-1	O95470	SGPL1	spl-3		Q9ULV1	FZD4	mig-1	Q93097	WNT2B
		45	Q9UJU2	LEF1	pop-1	O14965	AURKA	air-2		Q13015	TCF7	pop-1	Q92793	CREBBP	cbp-2		Q9NQB0	TCF7L2	pop-1	P13010	XRCC5	cku-80		Q9BZL1	UBL5	ubl-5	Q8NAV1	PRPF38A	D1054.14		Q9NYA1	SPHK1	sphk-1	P07858	CTSB	cpr-4		Q9NRA0	SPHK2	sphk-1	Q9BX95	SGPP1	T13C5.6		Q9ULV1	FZD4	mig-1	P56704	WNT3A
		44	Q9UJU2	LEF1	pop-1	Q86V81	ALYREF	aly-3		Q13015	TCF7	pop-1	Q13761	RUNX3	rnt-1		Q9NQB0	TCF7L2	pop-1	Q9BYD5	CNFN	CNFN		Q9BZL1	UBL5	ubl-5	Q5T4B2	CERCAM	D2045.9		Q9NYA1	SPHK1	sphk-1	Q9NQC7	CYLD	cyld-1		Q9NRA0	SPHK2	sphk-1	Q8IWX5	SGPP2	T13C5.6		Q9ULV1	FZD4	mig-1	P56705	WNT4
		43	Q9UJU2	LEF1	pop-1	P35222	CTNNB1	bar-1		Q13015	TCF7	pop-1	O02482	CTNNB1	hmp-2		Q9NQB0	TCF7L2	pop-1	Q5TA45	CPSF3L	CPSF3L		Q9BZL1	UBL5	ubl-5	Q15029	EFTUD2	eftu-2		Q9NYA1	SPHK1	sphk-1	P49366	DHPS	dhps-1		Q9NRA0	SPHK2	sphk-1		PPAP2C	T28D9.3		Q9ULV1	FZD4	mig-1	P56706
		42	Q9UJU2	LEF1	pop-1	Q09472	EP300	cbp-2		Q13015	TCF7	pop-1	O02482	TLE4	unc-37		Q9NQB0	TCF7L2	pop-1	Q13363	CTBP1	ctbp-1		Q9BZL1	UBL5	ubl-5	Q3KNR5	PAX4	eyg-1		Q9NYA1	SPHK1	sphk-1	Q7Z4W1	DCXR	dhs-21		Q9NRA0	SPHK2	sphk-1		TYK2	TYK2		Q9ULV1	FZD4	mig-1		WNT3
		41	Q9UJU2	LEF1	pop-1	Q07812	BAX	ced-9		Q13015	TCF7	pop-1	O02482	TLE3	unc-37		Q9NQB0	TCF7L2	pop-1	O15105	SMAD7	daf-14		Q9BZL1	UBL5	ubl-5	Q9BRX9	WDR83	F33G12.2		Q9NYA1	SPHK1	sphk-1	O60762	DPM1	dpm-1		Q9NRA0	SPHK2	sphk-1	Q8TDN7	ACER1	W02F12.2		Q9ULV1	FZD4	mig-1	P09544	WNT2
		46	Q9UJU2	LEF1	pop-1	Q9NYF0	DACT1	DACT1		Q13015	TCF7	pop-1	O02482	HDAC1	had-4		Q9NQB0	TCF7L2	pop-1	Q15038	DAZAP2	DAZAP2		Q9BZL1	UBL5	ubl-5	Q9Y2W2	WBP11	F33H1.3		Q9NYA1	SPHK1	sphk-1	Q7Z6Z7	HUWE1	eel-1		Q9NRA0	SPHK2	sphk-1	Q5QJU3	ACER2	W02F12.2		Q9ULV1	FZD4	mig-1	P41221	WNT5A
		39	Q9UJU2	LEF1	pop-1	Q13485	SMAD4	daf-14		Q13015	TCF7	pop-1		UCHL5	ubh-4		Q9NQB0	TCF7L2	pop-1	O00716	E2F3	efl-2		Q9BZL1	UBL5	ubl-5	Q9Y247	FAM50B	FAM50B		Q9NYA1	SPHK1	sphk-1	P35579	MYH9	F45G2.2		Q9NRA0	SPHK2	sphk-1		HECW2	hecw-1		Q9ULV1	FZD4	mig-1	O14641	DVL2
		40	Q9UJU2	LEF1	pop-1	O15105	SMAD7	daf-14		Q13015	TCF7	pop-1		ZMIZ1	miz-1		Q9NQB0	TCF7L2	pop-1	Q15717	ELAVL1	exc-7		Q9BZL1	UBL5	ubl-5	Q9NVI1	FANCI	FANCI		Q9NYA1	SPHK1	sphk-1	P51570	GALK1	GALK1		Q9NRA0	SPHK2	sphk-1		PRKAR1A	kin-2		Q9ULV1	FZD4	mig-1	Q9UBV4
		38	Q9UJU2	LEF1	pop-1	P08069	IGF1R	daf-2		Q13015	TCF7	pop-1		PJA2	Y54E10BR.3		Q9NQB0	TCF7L2	pop-1	Q6NVU6	UFSP1	F38A5.1		Q9BZL1	UBL5	ubl-5	Q5JQS6	GCSAML	GCSAML		Q9NYA1	SPHK1	sphk-1	O95425	SVIL	gsnl-1		Q9NRA0	SPHK2	sphk-1		MAPKAPK2	mak-2		Q9ULV1	FZD4	mig-1	O75197
		47	Q9UJU2	LEF1	pop-1	Q15038	DAZAP2	DAZAP2		Q13015	TCF7	pop-1		DAZAP2	DAZAP2		Q9NQB0	TCF7L2	pop-1	A1KXE4	FAM168B	FAM168B		Q9BZL1	UBL5	ubl-5	Q8IV36	HID1	hid-1		Q9NYA1	SPHK1	sphk-1	Q5SSJ5	HP1BP3	HP1BP3		Q9NRA0	SPHK2	sphk-1		MAP3K10	mlk-1		Q9ULV1	FZD4	mig-1	Q00604	NDP
		37	Q9UJU2	LEF1	pop-1	Q16555	DPYSL2	dhp-1		Q13015	TCF7	pop-1		SS18L1	ZK973.9		Q9NQB0	TCF7L2	pop-1	P23142	FBLN1	fbl-1		Q9BZL1	UBL5	ubl-5	Q9UGU5	HMGXB4	HMGXB4		Q9NYA1	SPHK1	sphk-1	P22626	HNRNPA2B1	hrp-1		Q9NRA0	SPHK2	sphk-1		PRKAA1	sad-1		Q9ULV1	FZD4	mig-1		RAB5A
		36	Q9UJU2	LEF1	pop-1	Q01094	E2F1	efl-3									Q9NQB0	TCF7L2	pop-1	Q08050	FOXM1	fkh-8		Q9BZL1	UBL5	ubl-5	Q16082	HSPB2	hsp-12.2		Q9NYA1	SPHK1	sphk-1	P11142	HSPA8	hsp-110		Q9NRA0	SPHK2	sphk-1		HIST1H3A	HIST1H3A		Q9ULV1	FZD4	mig-1		PDZRN3
		35	Q9UJU2	LEF1	pop-1	Q9NQB0	TCF7L2	egl-13									Q9NQB0	TCF7L2	pop-1	P35637	FUS	fust-1		Q9BZL1	UBL5	ubl-5	P13612	ITGA4	ITGA4		Q9NYA1	SPHK1	sphk-1	O43795	MYO1B	hum-1		Q9NRA0	SPHK2	sphk-1		RAB9A	RAB9A		Q9ULV1	FZD4	mig-1		Dvl3
		34	Q9UJU2	LEF1	pop-1	Q9UBS8	RNF14	F56D2.5									Q9NQB0	TCF7L2	pop-1	Q13107	USP4	H34C03.2		Q9BZL1	UBL5	ubl-5	P60410	KRTAP10-8	KRTAP10-8		Q9NYA1	SPHK1	sphk-1	O00159	MYO1C	hum-1		Q9NRA0	SPHK2	sphk-1		BRCA2	BRCA2		Q9ULV1	FZD4	mig-1		BAG6
		48	Q9UJU2	LEF1	pop-1	P49789	FHIT	FHIT									Q9NQB0	TCF7L2	pop-1	O60381	HBP1	HBP1		Q9BZL1	UBL5	ubl-5	Q3SY46	KRTAP13-3	KRTAP13-3		Q9NYA1	SPHK1	sphk-1	O94832	MYO1D	hum-5		Q9NRA0	SPHK2	sphk-1		CSF3R	CSF3R		Q9ULV1	FZD4	mig-1		DLG4
		33	Q9UJU2	LEF1	pop-1	P10242	MYB	gei-11									Q9NQB0	TCF7L2	pop-1	Q14526	HIC1	HIC1		Q9BZL1	UBL5	ubl-5	Q8IVT5	KSR1	ksr-1		Q9NYA1	SPHK1	sphk-1	Q16643	DBN1	K08E3.4									Q9ULV1	FZD4	mig-1		NDP
		32	Q9UJU2	LEF1	pop-1	Q8N2W9	PIAS4	gei-17									Q9NQB0	TCF7L2	pop-1	P35222	CTNNB1	hmp-2		Q9BZL1	UBL5	ubl-5	Q96BZ8	LENG1	LENG1		Q9NYA1	SPHK1	sphk-1	Q9UHL4	DPP7	K12H4.7									Q9ULV1	FZD4	mig-1		RAB5A
		31	Q9UJU2	LEF1	pop-1	Q13547	HDAC1	hda-4									Q9NQB0	TCF7L2	pop-1	P14923	JUP	hmp-2		Q9BZL1	UBL5	ubl-5	Q8WWY6	MBD3L1	mdb-2		Q9NYA1	SPHK1	sphk-1	O00515	LAD1	LAD1									Q9ULV1	FZD4	mig-1		ZNRF3
		30	Q9UJU2	LEF1	pop-1	P49773	HINT1	hint-1									Q9NQB0	TCF7L2	pop-1	Q9H5V7	IKZF5	IKZF5		Q9BZL1	UBL5	ubl-5	P55081	MFAP1	mfap-1		Q9NYA1	SPHK1	sphk-1	O14578	CIT	let-502
		29	Q9UJU2	LEF1	pop-1	O75030	MITF	hlh-30									Q9NQB0	TCF7L2	pop-1	O75564	JRK	JRK		Q9BZL1	UBL5	ubl-5	Q9Y376	CAB39	mop-25.2		Q9NYA1	SPHK1	sphk-1	O75116	ROCK2	let-502
		28	Q9UJU2	LEF1	pop-1	P01111	NRAS	let-60									Q9NQB0	TCF7L2	pop-1	Q5BKX5	C19ORF54	K07A1.3		Q9BZL1	UBL5	ubl-5	O00746	NME4	ndk-1		Q9NYA1	SPHK1	sphk-1	Q6P1M3	LLGL2	lgl-1
		27	Q9UJU2	LEF1	pop-1	P06400	RB1	lin-35									Q9NQB0	TCF7L2	pop-1	Q8WWG9	KCNE4	KCNE4		Q9BZL1	UBL5	ubl-5	P23511	NFYA	nfya-1		Q9NYA1	SPHK1	sphk-1	Q14192	FHL2	lim-9
		26	Q9UJU2	LEF1	pop-1	Q9UBE8	NLK	lit-1									Q9NQB0	TCF7L2	pop-1	Q3LI72	KRTAP19-5	KRTAP19-5		Q9BZL1	UBL5	ubl-5	Q9NQ35	NRIP3	NRIP3		Q9NYA1	SPHK1	sphk-1	P49006	MARCKSL1	MARCKSL1
		25	Q9UJU2	LEF1	pop-1	P40692	MLH1	mlh-1									Q9NQB0	TCF7L2	pop-1	Q3LI59	KRTAP21-2	KRTAP21-2		Q9BZL1	UBL5	ubl-5	Q96BK5	PINX1	PINX1		Q9NYA1	SPHK1	sphk-1	Q14703	MBTPS1	MBTPS1
		49	Q9UJU2	LEF1	pop-1	Q9UHC1	MLH3	MLH3									Q9NQB0	TCF7L2	pop-1	Q3LI64	KRTAP6-1	KRTAP6-1		Q9BZL1	UBL5	ubl-5	O60828	PQBP1	pqbp-1.2		Q9NYA1	SPHK1	sphk-1	Q13257	MAD2L1	mdf-2
		50	Q9UJU2	LEF1	pop-1	Q13015	MLLT11	MLLT11									Q9NQB0	TCF7L2	pop-1	Q3LI66	KRTAP6-2	KRTAP6-2		Q9BZL1	UBL5	ubl-5	Q9NR22	PRMT8	prmt-1		Q9NYA1	SPHK1	sphk-1	P21291	CSRP1	mlp-1
		24	Q9UJU2	LEF1	pop-1	P43246	MSH2	msh-2									Q9NQB0	TCF7L2	pop-1	Q8IUC3	KRTAP7-1	KRTAP7-1		Q9BZL1	UBL5	ubl-5	Q5BKY6	Q5BKY6	Q5BKY6		Q9NYA1	SPHK1	sphk-1	Q5T2W1	PDZK1	nrfl-1
		23	Q9UJU2	LEF1	pop-1	P46531	NOTCH1	mua-3									Q9NQB0	TCF7L2	pop-1	Q93062	RBPMS	mec-8		Q9BZL1	UBL5	ubl-5	Q6ICL0	Q6ICL0	Q6ICL0		Q9NYA1	SPHK1	sphk-1	P04181	OAT	oatr-1
		22	Q9UJU2	LEF1	pop-1	Q9UHQ1	NARF	oxy-4									Q9NQB0	TCF7L2	pop-1	O00255	MEN1	MEN1		Q9BZL1	UBL5	ubl-5	Q8N4W5	Q8N4W5	Q8N4W5		Q9NYA1	SPHK1	sphk-1	Q8TAA3	PSMA8	pas-4
		21	Q9UJU2	LEF1	pop-1	P47902	CDX1	pal-1									Q9NQB0	TCF7L2	pop-1	P09874	PARP1	parp-1		Q9BZL1	UBL5	ubl-5	Q9UJW9	SERTAD3	SERTAD3		Q9NYA1	SPHK1	sphk-1	P25788	PSMA3	pas-7
		20	Q9UJU2	LEF1	pop-1	Q15831	STK11	par-4									Q9NQB0	TCF7L2	pop-1	P25788	PSMA3	pas-7		Q9BZL1	UBL5	ubl-5	Q15637	SF1	sfa-1		Q9NYA1	SPHK1	sphk-1	P28072	PSMB6	pbs-1
		51	Q9UJU2	LEF1	pop-1	Q96LA8	PRMT6	PRMT6									Q9NQB0	TCF7L2	pop-1	P29590	PML	PML		Q9BZL1	UBL5	ubl-5	P49901	SMCP	SMCP		Q9NYA1	SPHK1	sphk-1	P49721	PSMB2	pbs-4
		52	Q9UJU2	LEF1	pop-1	Q8WVD3	RNF138	RNF138									Q9NQR1	SETD8	SETD8	Q9NQB0	TCF7L2	pop-1		Q9BZL1	UBL5	ubl-5	P62318	SNRPD3	snr-1		Q9NYA1	SPHK1	sphk-1	Q16822	PCK2	pck-2
		55	Q9UJU2	LEF1	pop-1	Q9Y265	RUVBL1	ruvb-1									Q9UBE8	NLK	lit-1	Q9NQB0	TCF7L2	pop-1		Q9BZL1	UBL5	ubl-5	P62314	SNRPD1	snr-3		Q9NYA1	SPHK1	sphk-1	Q99873	PRMT1	prmt-1
		19	Q9UJU2	LEF1	pop-1	O43683	BUB1	san-1									Q9UER7	DAXX	DAXX	Q9NQB0	TCF7L2	pop-1		Q9BZL1	UBL5	ubl-5	Q9NS25	SPANXF1	SPANXF1		Q9NYA1	SPHK1	sphk-1	P98179	RBM3	R06C1.4
		18	Q9UJU2	LEF1	pop-1	Q9NQR1	SETD8	set-1									Q9UI95	MAD2L2	MAD2L2	Q9NQB0	TCF7L2	pop-1		Q9BZL1	UBL5	ubl-5	Q9H0A9	SPATC1L	SPATC1L		Q9NYA1	SPHK1	sphk-1	Q15286	RAB35	rab-35
		15	Q9UJU2	LEF1	pop-1	Q15797	SMAD1	sma-2									Q9UJU2	LEF1	egl-13	Q9NQB0	TCF7L2	pop-1		Q9BZL1	UBL5	ubl-5	P49759	CLK1	tag-172		Q9NYA1	SPHK1	sphk-1	Q96S38	RPS6KC1	rskd-1
		16	Q9UJU2	LEF1	pop-1	Q15796	SMAD2	sma-2									Q9UKE5	TNIK	mig-15	Q9NQB0	TCF7L2	pop-1		Q9BZL1	UBL5	ubl-5	P49760	CLK2	tag-172		Q9NYA1	SPHK1	sphk-1	P62993	GRB2	sem-5
		17	Q9UJU2	LEF1	pop-1	P84022	SMAD3	sma-2									Q9NQB0	TCF7L2	pop-1	Q96LA8	PRMT6	PRMT6		Q9BZL1	UBL5	ubl-5	Q9HAZ1	CLK4	tag-172		Q9NYA1	SPHK1	sphk-1	P13631	RARG	sex-1
		14	Q9UJU2	LEF1	pop-1	P42229	STAT5A	sta-2									Q9NQB0	TCF7L2	pop-1	P86480	PRR20D	PRR20D		Q9BZL1	UBL5	ubl-5	Q96KR7	PHACTR3	tct-1		Q9NYA1	SPHK1	sphk-1	P06241	FYN	src-1
		53	Q9UJU2	LEF1	pop-1	P17480	UBTF	UBTF									Q9NQB0	TCF7L2	pop-1	Q86WV8	Q86WV8	Q86WV8		Q9BZL1	UBL5	ubl-5	Q5T0J7	TEX35	TEX35		Q9NYA1	SPHK1	sphk-1	P63151	PPP2R2A	sur-6
		13	Q9UJU2	LEF1	pop-1	Q99697	PITX2	unc-30									Q9NQB0	TCF7L2	pop-1	Q8N0U1	Q8N0U1	Q8N0U1		Q9BZL1	UBL5	ubl-5	Q8WTV1	THAP3	THAP3		Q9NYA1	SPHK1	sphk-1	O15355	PPM1G	T23F11.1
		11	Q9UJU2	LEF1	pop-1	Q04724	TLE1	unc-37									Q9NQB0	TCF7L2	pop-1	Q8WVD3	RNF138	RNF138		Q9BZL1	UBL5	ubl-5	Q9HCM9	TRIM39	TRIM39		Q9NYA1	SPHK1	sphk-1	O00268	TAF4	taf-4
		12	Q9UJU2	LEF1	pop-1	Q04725	TLE2	unc-37									Q9NQB0	TCF7L2	pop-1	Q13761	RUNX3	rnt-1		Q9BZL1	UBL5	ubl-5	P10599	TXN	trx-4		Q9NYA1	SPHK1	sphk-1	Q12933	TRAF2	trf-1
		54	Q9UJU2	LEF1	pop-1	Q9H5J0	ZBTB3	ZBTB3									Q9NQB0	TCF7L2	pop-1	P49768	PSEN1	sel-12		Q9BZL1	UBL5	ubl-5	Q15019	SEPTIN2	unc-59		Q9NYA1	SPHK1	sphk-1	P49411	TUFM	tufm-1
		67	Q9UJU2	LEF1	pop-1		ALYREF	aly-3									Q9NQB0	TCF7L2	pop-1	Q53HV7	SMUG1	SMUG1		Q9BZL1	UBL5	ubl-5	P19320	VCAM1	VCAM1		Q9NYA1	SPHK1	sphk-1	O95816	BAG2	unc-23
		65	Q9UJU2	LEF1	pop-1		SMAD7	daf-14									Q9NQB0	TCF7L2	pop-1	Q13077	TRAF1	trf-1		Q9BZL1	UBL5	ubl-5	Q9UL46	PSME2	Y66D12A.9		Q9NYA1	SPHK1	sphk-1	P60981	DSTN	unc-60
		87	Q9UJU2	LEF1	pop-1		SMAD4	daf-14									Q9NQB0	TCF7L2	pop-1	O43186	CRX	ttx-1		Q9BZL1	UBL5	ubl-5	Q8N8Y5	ZFP41	ZFP41		Q9NYA1	SPHK1	sphk-1	Q9NYL9	TMOD3	unc-94
		74	Q9UJU2	LEF1	pop-1		DPYSL2	dhp-2									Q9NQB0	TCF7L2	pop-1	P63279	UBE2I	ubc-9		Q9BZL1	UBL5	ubl-5	Q15973	ZNF124	ZNF124		Q9NYA1	SPHK1	sphk-1	Q9Y4K3	TRAF6	Y110A7A.2
		57	Q9UJU2	LEF1	pop-1		E2F1	efl-3									Q9NQB0	TCF7L2	pop-1	Q04726	TLE3	unc-37		Q9BZL1	UBL5	ubl-5	Q5T7W0	ZNF618	ZNF618		Q9NYA1	SPHK1	sphk-1	Q9UH62	ARMCX3	Y67A10A.7
		83	Q9UJU2	LEF1	pop-1		EGLN3	egl-9									Q9NQB0	TCF7L2	pop-1	P35548	MSX2	vab-15		Q9BZL1	UBL5	ubl-5	P38432	COIL			Q9NYA1	SPHK1	sphk-1	O95793	STAU1	Y95B8A.8
		62	Q9UJU2	LEF1	pop-1		Kpna2	F53B2.5									Q9NQB0	TCF7L2	pop-1	Q68DV7	RNF43	Y47D3B.11		Q9BZL1	UBL5	ubl-5	P78358	CTAG1B			Q9NYA1	SPHK1	sphk-1	Q9NUN7	ACER3	ACER3
		76	Q9UJU2	LEF1	pop-1		RNF14	F56D2.5									Q9NQB0	TCF7L2	pop-1	Q86T24	ZBTB33	ZBTB33		Q9BZL1	UBL5	ubl-5		RBMX2	C30B5.4		Q9NYA1	SPHK1	sphk-1	Q9NR71	ASAH2	ASAH2
		85	Q9UJU2	LEF1	pop-1		MYB	gei-11									Q9NQB0	TCF7L2	pop-1		CABIN1	CABIN1		Q9BZL1	UBL5	ubl-5		SNIP1	C32E8.5		Q9NYA1	SPHK1	sphk-1	P07948	LYN	LYN
		63	Q9UJU2	LEF1	pop-1		PIAS4	gei-17									Q9NQB0	TCF7L2	pop-1		DAXX	DAXX		Q9BZL1	UBL5	ubl-5	O43290	SART1	F19F10.9		Q9NYA1	SPHK1	sphk-1		PPAP2B	plpp-1.1
		68	Q9UJU2	LEF1	pop-1		NOTCH1	glp-1									Q9NQB0	TCF7L2	pop-1		DAZAP2	DAZAP2		Q9BZL1	UBL5	ubl-5	P49756	RBM25	H28G03.2		Q9NYA1	SPHK1	sphk-1	Q2M3C7	SPHKAP	SPHKAP
		59	Q9UJU2	LEF1	pop-1		HDAC1	hda-4									Q9NQB0	TCF7L2	pop-1		DEK	DEK		Q9BZL1	UBL5	ubl-5		CAB39	mop-25.1		Q9NYA1	SPHK1	sphk-1	O95470	SGPL1	spl-3
		60	Q9UJU2	LEF1	pop-1		HINT1	hint-1									Q9NQB0	TCF7L2	pop-1		EMD	EMD		Q9BZL1	UBL5	ubl-5		PRPF8	prp-8		Q9NYA1	SPHK1	sphk-1	Q9BX95	SGPP1	T13C5.6
		64	Q9UJU2	LEF1	pop-1		MITF	hlh-30									Q9NQB0	TCF7L2	pop-1		HBP1	HBP1		Q9BZL1	UBL5	ubl-5		BUD13	R08D7.1		Q9NYA1	SPHK1	sphk-1	Q8IWX5	SGPP2	T13C5.6
		61	Q9UJU2	LEF1	pop-1		Kpna1	ima-3									Q9NQB0	TCF7L2	pop-1		HIC1	HIC1		Q9BZL1	UBL5	ubl-5		SNRNP200	snrp-200		Q9NYA1	SPHK1	sphk-1	Q8TDN7	ACER1	W02F12.2
		75	Q9UJU2	LEF1	pop-1		NARF	oxy-4									Q9NQB0	TCF7L2	pop-1		KTN1	KTN1		Q9BZL1	UBL5	ubl-5	P61088	UBE2N	ubc-13		Q9NYA1	SPHK1	sphk-1	Q5QJU3	ACER2	W02F12.2
		66	Q9UJU2	LEF1	pop-1		RUVBL1	ruvb-1									Q9NQB0	TCF7L2	pop-1		LIFR	LIFR		Q9BZL1	UBL5	ubl-5	O60508	CDC40	Y54G2A.12		Q9NYA1	SPHK1	sphk-1		MBTPS1	MBTPS1
		71	Q9UJU2	LEF1	pop-1		SMAD3	sma-2									Q9NQB0	TCF7L2	pop-1		MAD2L2	MAD2L2		Q9BZL1	UBL5	ubl-5		CLK2	tag-172		Q9NYA1	SPHK1	sphk-1		PPM1G	cdka-1
		78	Q9UJU2	LEF1	pop-1		SMAD1	sma-2									Q9NQB0	TCF7L2	pop-1		MAP7D1	MAP7D1		Q9BZL1	UBL5	ubl-5		COIL	COIL		Q9NYA1	SPHK1	sphk-1		RPS6KC1	rskd-1
		88	Q9UJU2	LEF1	pop-1		STAT5A	sta-2									Q9NQB0	TCF7L2	pop-1		MAZ	MAZ		Q9BZL1	UBL5	ubl-5		TRIM27	B0281.8		Q9NYA1	SPHK1	sphk-1		TRAF6	Y110A7A.2
		89	Q9UJU2	LEF1	pop-1		ubc	ubq-1									Q9NQB0	TCF7L2	pop-1		MDC1	MDC1		Q9BZL1	UBL5	ubl-5		TXN	trx-1		Q9NYA1	SPHK1	sphk-1		RARG	daf-12
		73	Q9UJU2	LEF1	pop-1		PITX2	unc-30									Q9NQB0	TCF7L2	pop-1		MRPS21	MRPS21		Q9BZL1	UBL5	ubl-5		BMI1	mig-32		Q9NYA1	SPHK1	sphk-1		PRKCD	tpa-1
		92	Q9UJU2	LEF1	pop-1		PJA2	Y54E10BR.3									Q9NQB0	TCF7L2	pop-1		NPM3	NPM3		Q9BZL1	UBL5	ubl-5		Bcas2	bcas-2		Q9NYA1	SPHK1	sphk-1		MAP4K1	gck-2
		56	Q9UJU2	LEF1	pop-1		DAZAP2	DAZAP2									Q9NQB0	TCF7L2	pop-1		PELP1	PELP1		Q9BZL1	UBL5	ubl-5		CLK1	C16A11.10		Q9NYA1	SPHK1	sphk-1		AANAT	AANAT
		58	Q9UJU2	LEF1	pop-1		FHIT	FHIT									Q9NQB0	TCF7L2	pop-1		PLIN3	PLIN3		Q9BZL1	UBL5	ubl-5		CRKL	ced-2		Q9NYA1	SPHK1	sphk-1		SRC	src-1
		69	Q9UJU2	LEF1	pop-1		SMAD2	SMAD2									Q9NQB0	TCF7L2	pop-1		PRKDC	PRKDC		Q9BZL1	UBL5	ubl-5		HSPB2	F08H9.4		Q9NYA1	SPHK1	sphk-1		PIK3CG	age-1
		70	Q9UJU2	LEF1	pop-1		DACT1	DACT1									Q9NQB0	TCF7L2	pop-1		PRMT6	PRMT6		Q9BZL1	UBL5	ubl-5		SART1	F19F10.9		Q9NYA1	SPHK1	sphk-1		BECN1	bec-1
		72	Q9UJU2	LEF1	pop-1		nrarp	nrarp									Q9NQB0	TCF7L2	pop-1		RNF138	RNF138		Q9BZL1	UBL5	ubl-5		WDR83	F33G12.2		Q9NYA1	SPHK1	sphk-1		BIRC3	bir-2
		77	Q9UJU2	LEF1	pop-1		RNF138	RNF138									Q9NQB0	TCF7L2	pop-1		RPA3	RPA3		Q9BZL1	UBL5	ubl-5		FANCI	fnci-1		Q9NYA1	SPHK1	sphk-1		EP300	cbp-2
		79	Q9UJU2	LEF1	pop-1		SETD8	SETD8									Q9NQB0	TCF7L2	pop-1		ZBTB33	ZBTB33		Q9BZL1	UBL5	ubl-5		PCBP1	fubl-1		Q9NYA1	SPHK1	sphk-1		CYLD	cyld-1
		80	Q9UJU2	LEF1	pop-1		TCF7L2	TCF7L2									Q9NQB0	TCF7L2	pop-1		PML	PML		Q9BZL1	UBL5	ubl-5		CLK4	hpk-1		Q9NYA1	SPHK1	sphk-1		DHPS	dhps-1
		81	Q9UJU2	LEF1	pop-1		NFATC1	NFATC1									Q9NQB0	TCF7L2	pop-1		MEN1	MEN1		Q9BZL1	UBL5	ubl-5		CAB39	mop-25.2		Q9NYA1	SPHK1	sphk-1		DCXR	dhs-21
		82	Q9UJU2	LEF1	pop-1		NFATC2	NFATC2									Q9NQB0	TCF7L2	pop-1		AR	AR		Q9BZL1	UBL5	ubl-5		NR2C2	nhr-41		Q9NYA1	SPHK1	sphk-1		GMPS	gmps-1
		84	Q9UJU2	LEF1	pop-1		TNIP2	TNIP2									Q9NQB0	TCF7L2	pop-1		IKZF5	IKZF5		Q9BZL1	UBL5	ubl-5		ITGA4	pat-2		Q9NYA1	SPHK1	sphk-1		TRAF2	trf-1
		86	Q9UJU2	LEF1	pop-1		PRMT6	PRMT6									Q9NQB0	TCF7L2	pop-1		UHRF2	UHRF2		Q9BZL1	UBL5	ubl-5		Pqbp1	pqbp-1.1
		90	Q9UJU2	LEF1	pop-1		UBTF	UBTF									Q9NQB0	TCF7L2	pop-1		RNF4	RNF4		Q9BZL1	UBL5	ubl-5		UBE2N	ubc-13
		91	Q9UJU2	LEF1	pop-1		ZBTB3	ZBTB3									Q9NQB0	TCF7L2	pop-1		KCNE4	KCNE4		Q9BZL1	UBL5	ubl-5		PF11_0336	PF11_0336
		93															Q9NQB0	TCF7L2	pop-1		TJP1	TJP1		Q9BZL1	UBL5	ubl-5		WAPAL	WAPAL
		94															Q9NQB0	TCF7L2	pop-1		UBN1	UBN1
		95															Q9NQB0	TCF7L2	pop-1		UBN2	UBN2
		96															Q9NQB0	TCF7L2	pop-1		UBTF	UBTF
		97															Q9NQB0	TCF7L2	pop-1		HSD17B10	ard-1
		98															Q9NQB0	TCF7L2	pop-1		TRIM27	B0281.8
		99															Q9NQB0	TCF7L2	pop-1		HADHB	B0303.3
		100															Q9NQB0	TCF7L2	pop-1		CTNNB1	bar-1
		101															Q9NQB0	TCF7L2	pop-1		XIAP	bir-2
		102															Q9NQB0	TCF7L2	pop-1		XIAP	bir-2
		103															Q9NQB0	TCF7L2	pop-1		PSIP1	C06A5.3
		104															Q9NQB0	TCF7L2	pop-1		LYAR	C16C10.8
		105															Q9NQB0	TCF7L2	pop-1		NIP7	C43E11.9
		106															Q9NQB0	TCF7L2	pop-1		EP300	cbp-2
		107															Q9NQB0	TCF7L2	pop-1		CDC73	cdc-73
		108															Q9NQB0	TCF7L2	pop-1		CUX1	ceh-44
		109															Q9NQB0	TCF7L2	pop-1		NKX2-1	ceh-9
		110															Q9NQB0	TCF7L2	pop-1		CLTC	chc-1
		111															Q9NQB0	TCF7L2	pop-1		STUB1	chn-1
		112															Q9NQB0	TCF7L2	pop-1		XRCC6	cku-70
		113															Q9NQB0	TCF7L2	pop-1		XRCC6	cku-70
		114															Q9NQB0	TCF7L2	pop-1		XRCC6	cku-70
		115															Q9NQB0	TCF7L2	pop-1		XRCC5	cku-80
		116															Q9NQB0	TCF7L2	pop-1		XRCC5	cku-80
		117															Q9NQB0	TCF7L2	pop-1		XRCC5	cku-80
		118															Q9NQB0	TCF7L2	pop-1		CLTA	clic-1
		119															Q9NQB0	TCF7L2	pop-1		CTBP1	ctbp-1
		120															Q9NQB0	TCF7L2	pop-1		CTBP1	ctbp-1
		121															Q9NQB0	TCF7L2	pop-1		SMAD7	daf-14
		122															Q9NQB0	TCF7L2	pop-1		PTGES3	daf-41
		123															Q9NQB0	TCF7L2	pop-1		DAP3	dap-3
		124															Q9NQB0	TCF7L2	pop-1		DICER1	dcr-1
		125															Q9NQB0	TCF7L2	pop-1		TIMM8A	ddp-1
		126															Q9NQB0	TCF7L2	pop-1		TIMM8B	ddp-1
		127															Q9NQB0	TCF7L2	pop-1		DLAT	dlat-1
		128															Q9NQB0	TCF7L2	pop-1		GATA3	elt-2
		129															Q9NQB0	TCF7L2	pop-1		GATA3	elt-2
		130															Q9NQB0	TCF7L2	pop-1		GATA3	elt-2
		131															Q9NQB0	TCF7L2	pop-1		TMPO	emr-1
		132															Q9NQB0	TCF7L2	pop-1		ELAVL1	exc-7
		133															Q9NQB0	TCF7L2	pop-1		MRTO4	F10E7.5
		134															Q9NQB0	TCF7L2	pop-1		WDR3	F13H8.2
		135															Q9NQB0	TCF7L2	pop-1		CEBPZ	F23B12.7
		136															Q9NQB0	TCF7L2	pop-1		KCTD12	F32B4.5
		137															Q9NQB0	TCF7L2	pop-1		UBR5	F36A2.13
		138															Q9NQB0	TCF7L2	pop-1		TRMT10C	F46F11.10
		139															Q9NQB0	TCF7L2	pop-1		FBLN1	fbl-1
		140															Q9NQB0	TCF7L2	pop-1		EWSR1	fust-1
		141															Q9NQB0	TCF7L2	pop-1		FUS	fust-1
		142															Q9NQB0	TCF7L2	pop-1		USP4	H34C03.2
		143															Q9NQB0	TCF7L2	pop-1		NUMA1	hcp-1
		144															Q9NQB0	TCF7L2	pop-1		HIRA	hira-1
		145															Q9NQB0	TCF7L2	pop-1		HMGB1	hmg-1.2
		146															Q9NQB0	TCF7L2	pop-1		CTNNA1	hmp-1
		147															Q9NQB0	TCF7L2	pop-1		CTNNA2	hmp-1
		148															Q9NQB0	TCF7L2	pop-1		JUP	hmp-2
		149															Q9NQB0	TCF7L2	pop-1		CBX3	hpl-1
		150															Q9NQB0	TCF7L2	pop-1		HNRNPL	hrpl-1
		151															Q9NQB0	TCF7L2	pop-1		HSPA4	hsp-110
		152															Q9NQB0	TCF7L2	pop-1		HSPA4L	hsp-110
		153															Q9NQB0	TCF7L2	pop-1		LIG3	K07C5.3
		154															Q9NQB0	TCF7L2	pop-1		CSNK2B	kin-10
		155															Q9NQB0	TCF7L2	pop-1		CSNK2A2	kin-3
		156															Q9NQB0	TCF7L2	pop-1		LEMD2	lem-2
		157															Q9NQB0	TCF7L2	pop-1		CHD4	let-418
		158															Q9NQB0	TCF7L2	pop-1		PTCD3	let-630
		159															Q9NQB0	TCF7L2	pop-1		MTA2	lin-40
		160															Q9NQB0	TCF7L2	pop-1		NLK	lit-1
		161															Q9NQB0	TCF7L2	pop-1		RBBP4	ln-53
		162															Q9NQB0	TCF7L2	pop-1		PES1	lpd-7
		163															Q9NQB0	TCF7L2	pop-1		PDCD6	M04F3.4
		164															Q9NQB0	TCF7L2	pop-1		USP7	math-33
		165															Q9NQB0	TCF7L2	pop-1		SOAT1	mboa-1
		166															Q9NQB0	TCF7L2	pop-1		RBPMS	mec-8
		167															Q9NQB0	TCF7L2	pop-1		SNRPA1	mog-2
		168															Q9NQB0	TCF7L2	pop-1		MRPS10	mrps-10
		169															Q9NQB0	TCF7L2	pop-1		MRPS11	mrps-11
		170															Q9NQB0	TCF7L2	pop-1		MRPS15	mrps-15
		171															Q9NQB0	TCF7L2	pop-1		MRPS16	mrps-16
		172															Q9NQB0	TCF7L2	pop-1		MRPS2	mrps-2
		173															Q9NQB0	TCF7L2	pop-1		MRPS22	mrps-22
		174															Q9NQB0	TCF7L2	pop-1		MRPS27	mrps-27
		175															Q9NQB0	TCF7L2	pop-1		MRPS31	mrps-31
		176															Q9NQB0	TCF7L2	pop-1		MRPS33	mrps-33
		177															Q9NQB0	TCF7L2	pop-1		MRPS34	mrps-34
		178															Q9NQB0	TCF7L2	pop-1		MRPS35	mrps-35
		179															Q9NQB0	TCF7L2	pop-1		MRPS5	mrps-5
		180															Q9NQB0	TCF7L2	pop-1		MRPS6	mrps-6
		181															Q9NQB0	TCF7L2	pop-1		MRPS7	mrps-7
		182															Q9NQB0	TCF7L2	pop-1		MRPS9	mrps-9
		183															Q9NQB0	TCF7L2	pop-1		SSBP1	mtss-1
		184															Q9NQB0	TCF7L2	pop-1		HNF4A	nhr-41
		185															Q9NQB0	TCF7L2	pop-1		PARP1	parp-1
		186															Q9NQB0	TCF7L2	pop-1		PARP1	parp-1
		187															Q9NQB0	TCF7L2	pop-1		PARP1	parp-1
		188															Q9NQB0	TCF7L2	pop-1		PARP1	parp-1
		189															Q9NQB0	TCF7L2	pop-1		PARP2	parp-2
		190															Q9NQB0	TCF7L2	pop-1		PSMA3	pas-7
		191															Q9NQB0	TCF7L2	pop-1		FOXA2	pha-4
		192															Q9NQB0	TCF7L2	pop-1		LEF1	pop-1
		193															Q9NQB0	TCF7L2	pop-1		PRDX4	prdx-3
		194															Q9NQB0	TCF7L2	pop-1		PRPF3	prp-3
		195															Q9NQB0	TCF7L2	pop-1		CCNG2	R02F2.1
		196															Q9NQB0	TCF7L2	pop-1		RANGAP1	ran-2
		197															Q9NQB0	TCF7L2	pop-1		RFC2	rfc-2
		198															Q9NQB0	TCF7L2	pop-1		RPA1	rpa-1
		199															Q9NQB0	TCF7L2	pop-1		RPA2	rpa-4
		200															Q9NQB0	TCF7L2	pop-1		SRSF7	rsp-6
		201															Q9NQB0	TCF7L2	pop-1		PSEN1	sel-12
		202															Q9NQB0	TCF7L2	pop-1		SOX2	sox-2
		203															Q9NQB0	TCF7L2	pop-1		SUPT16H	spt-16
		204															Q9NQB0	TCF7L2	pop-1		URB1	T05H4.10
		205															Q9NQB0	TCF7L2	pop-1		MRPS18C	T14B4.2
		206															Q9NQB0	TCF7L2	pop-1		ANP32B	T19H12.2
		207															Q9NQB0	TCF7L2	pop-1		HLTF	T23H2.3
		208															Q9NQB0	TCF7L2	pop-1		TBP	tbp-1
		209															Q9NQB0	TCF7L2	pop-1		TIMM13	tin-13
		210															Q9NQB0	TCF7L2	pop-1		VRK3	ttbk-4
		211															Q9NQB0	TCF7L2	pop-1		UBE2L6	ubc-18
		212															Q9NQB0	TCF7L2	pop-1		UBE2I	ubc-9
		213															Q9NQB0	TCF7L2	pop-1		UBE2I	ubc-9
		214															Q9NQB0	TCF7L2	pop-1		TLE3	unc-37
		215															Q9NQB0	TCF7L2	pop-1		TLE3	unc-37
		216															Q9NQB0	TCF7L2	pop-1		RNF43	Y47D3B.11
		217															Q9NQB0	TCF7L2	pop-1		CENPB	Y48G1C.6
		218															Q9NQB0	TCF7L2	pop-1		SETD8	SETD8
		219															Q9NQB0	TCF7L2	pop-1		HIST1H4A	HIST1H4A
		220															Q9NQB0	TCF7L2	pop-1	Q9Y2T1		AXIN2
		221															Q9NQB0	TCF7L2	pop-1	Q92793	CREBBP	cbp-2
		222															Q9NQB0	TCF7L2	pop-1	Q09472	EP300	cbp-2
		223															Q9NQB0	TCF7L2	pop-1		HDAC2	had-5
		224															Q9NQB0	TCF7L2	pop-1	Q13547	HDAC1	hda-4
		225															Q9NQB0	TCF7L2	pop-1		CTNNB1	hmp-2
		226															Q9NQB0	TCF7L2	pop-1	P01106		MYC
		227															Q9NQB0	TCF7L2	pop-1	Q9UBE8	NLK	NLK
		228															Q9NQB0	TCF7L2	pop-1	Q04724	TLE1	unc-37
		229															Q9NQB0	TCF7L2	pop-1	Q04727	TLE4	unc-37
		230															Q9NQB0	TCF7L2	pop-1	Q04726	TLE3	unc-37
		231															Q9NQB0	TCF7L2	pop-1		LEF1	unc-37
		232															Q9NQB0	TCF7L2	pop-1		TLE3	unc-37
		233
		234
		235
		236
		237
		238
		239
		240
		241
		242
		243
		244
		245
		246
		247
		248
		249
		250
		251
		252
		253
		254
		255
		256
		257
		258
		259
		260
		261
		262
		263
		264
		265
		266
		267
		268
		269
		270
		271
		272
		273
		274
		275
		276
		277
		278
		279
		280
		281
		282
		283
		284
		285
		286
		287
		288
		289
		290
		291
		292
		293
		294
		295
		296
		297
		298
		299
		300
		301
		302
		303
		304
		305
		306
		307
		308
		309
		310
		311
		312
		313
		314
		315
		316
		317
		318
		319
		320
		321
		322
		323
		324
		325
		326
		327
		328
		329
		330
		331
		332
		333
		334
		335
		336
		337
		338
		339
		340
		341
		342
		343
		344
		345
		346
		347
		348
		349
		350
		351
		352
		353
		354
		355
		356
		357
		358
		359
		360
		361
		362
		363
		364
		365
		366
		367
		368
		369
		370
		371
		372
		373
		374
		375
		376
		377
		378
		379
		380
		381
		382
		383
		384
		385
		386
		387
		388
		389
		390
		391
		392
		393
		394
		395
		396
		397
		398
		399
		400
		401
		402
		403
		404
		405
		406
		407
		408
		409
		410
		411
		412
		413
		414
		415
		416
		417
		418
		419
		420
		421
		422
		423
		424
		425
		426
		427
		428
		429
		430
		431
		432
		433
		434
		435
		436
		437
		438
		439
		440
		441
		442
		443
		444
		445
		446
		447
		448
		449
		450
		451
		452
		453
		454
		455
		456
		457
		458
		459
		460
		461
		462
		463
		464
		465
		466
		467
		468
		469
		470
		471
		472
		473
		474
		475
		476
		477
		478
		479
		480
		481
		482
		483
		484
		485
		486
		487
		488
		489
		490
		491
		492
		493
		494
		495
		496
		497
		498
		499
		500
		501
		502
		503
		504
		505
		506
		507
		508
		509
		510
		511
		512
		513
		514
		515
		516
		517
		518
		519
		520
		521
		522
		523
		524
		525
		526
		527
		528
		529
		530
		531
		532
		533
		534
		535
		536
		537
		538
		539
		540
		541
		542
		543
		544
		545
		546
		547
		548
		549
		550
		551
		552
		553
		554
		555
		556
		557
		558
		559
		560
		561
		562
		563
		564
		565
		566
		567
		568
		569
		570
		571
		572
		573
		574
		575
		576
		577
		578
		579
		580
		581
		582
		583
		584
		585
		586
		587
		588
		589
		590
		591
		592
		593
		594
		595
		596
		597
		598
		599
		600
		601
		602
		603
		604
		605
		606
		607
		608
		609
		610
		611
		612
		613
		614
		615
		616
		617
		618
		619
		620
		621
		622
		623
		624
		625
		626
		627
		628
		629
		630
		631
		632
		633
		634
		635
		636
		637
		638
		639
		640
		641
		642
		643
		644
		645
		646
		647
		648
		649
		650
		651
		652
		653
		654
		655
		656
		657
		658
		659
		660
		661
		662
		663
		664
		665
		666
		667
		668
		669
		670
		671
		672
		673
		674
		675
		676
		677
		678
		679
		680
		681
		682
		683
		684
		685
		686
		687
		688
		689
		690
		691
		692
		693
		694
		695
		696
		697
		698
		699
		700
		701
		702
		703
		704
		705
		706
		707
		708
		709
		710
		711
		712
		713
		714
		715
		716
		717
		718
		719
		720
		721
		722
		723
		724
		725
		726
		727
		728
		729
		730
		731
		732
		733
		734
		735
		736
		737
		738
		739
		740
		741
		742
		743
		744
		745
		746
		747
		748
		749
		750
		751
		752
		753
		754
		755
		756
		757
		758
		759
		760
		761
		762
		763
		764
		765
		766
		767
		768
		769
		770
		771
		772
		773
		774
		775
		776
		777
		778
		779
		780
		781
		782
		783
		784
		785
		786
		787
		788
		789
		790
		791
		792
		793
		794
		795
		796
		797
		798
		799
		800
		801
		802
		803
		804
		805
		806
		807
		808
		809
		810
		811
		812
		813
		814
		815
		816
		817
		818
		819
		820
		821
		822
		823
		824
		825
		826
		827
		828
		829
		830
		831
		832
		833
		834
		835
		836
		837
		838
		839
		840
		841
		842
		843
		844
		845
		846
		847
		848
		849
		850
		851
		852
		853
		854
		855
		856
		857
		858
		859
		860
		861
		862
		863
		864
		865
		866
		867
		868
		869
		870
		871
		872
		873
		874
		875
		876
		877
		878
		879
		880
		881
		882
		883
		884
		885
		886
		887
		888
		889
		890
		891
		892
		893
		894
		895
		896
		897
		898
		899
		900
		901
		902
		903
		904
		905
		906
		907
		908
		909
		910
		911
		912
		913
		914
		915
		916
		917
		918
		919
		920
		921
		922
		923
		924
		925
		926
		927
		928
		929
		930
		931
		932
		933
		934
		935
		936
		937
		938
		939
		940
		941
		942
		943
		944
		945
		946
		947
		948
		949
		950
		951
		952
		953
		954
		955
		956
		957
		958
		959
		960
		961
		962
		963
		964
		965
		966
		967
		968
		969
		970
		971
		972
		973
		974
		975
		976
		977
		978
		979
		980
		981
		982
		983
		984
		985
		986
		987
		988
		989
		990
		991
		992
		993
		994
		995
		996
		997
		998
		999
		1000
		1001
		1002
		1003
		1004
		1005
		1006
		1007
		1008
		1009
		1010
		1011
		1012
		1013
		1014
		1015
		1016
		1017
		1018
		1019
		1020
		1021
		1022
		1023
		1024
		1025
		1026
		1027
		1028
		1029
		1030
		1031
		1032
		1033
		1034
		1035
		1036
		1037
		1038
		1039
		1040
		1041
		1042
		1043
		1044
		1045
		1046
		1047
		1048
		1049
		1050
		1051
		1052
		1053
		1054
		1055
		1056
		1057
		1058
		1059
		1060
		1061
		1062
		1063
		1064
		1065
		1066
		1067
		1068
		1069
		1070
		1071
		1072
		1073
		1074
		1075
		1076
		1077
		1078
		1079
		1080
		1081
		1082
		1083
		1084
		1085
		1086
		1087
		1088
		1089
		1090
		1091
		1092
		1093
		1094
		1095
		1096
		1097
		1098
		1099
		1100
		1101
		1102
		1103
		1104
		1105
		1106
		1107
		1108
		1109
		1110
		1111
		1112
		1113
		1114
		1115
		1116
		1117
		1118
		1119
		1120
		1121
		1122
		1123
		1124
		1125
		1126
		1127
		1128
		1129
		1130
		1131
		1132
		1133
		1134
		1135
		1136
		1137
		1138
		1139
		1140
		1141
		1142
		1143
		1144
		1145
		1146
		1147
		1148
		1149
		1150
		1151
		1152
		1153
		1154
		1155
		1156
		1157
		1158
		1159
		1160
		1161
		1162
		1163
		1164
		1165
		1166
		1167
		1168
		1169
		1170
		1171
		1172
		1173
		1174
		1175
		1176
		1177
		1178
		1179
		1180
		1181
		1182
		1183
		1184
		1185
		1186
		1187
		1188
		1189
		1190
		1191
		1192
		1193
		1194
		1195
		1196
		1197
		1198
		1199
		1200
		1201
		1202
		1203
		1204
		1205
		1206
		1207
		1208
		1209
		1210
		1211
		1212
		1213
		1214
		1215
		1216
		1217
		1218
		1219
		1220
		1221
		1222
		1223
		1224
		1225
		1226
		1227
		1228
		1229
		1230
		1231
		1232
		1233
		1234
		1235
		1236
		1237
		1238
		1239
		1240
		1241
		1242
		1243
		1244
		1245
		1246
		1247
		1248
		1249
		1250
		1251
		1252
		1253
		1254
		1255
		1256
		1257
		1258
		1259
		1260
		1261
		1262
		1263
		1264
		1265
		1266
		1267
		1268
		1269
		1270
		1271
		1272
		1273
		1274
		1275
		1276
		1277
		1278
		1279
		1280
		1281
		1282
		1283
		1284
		1285
		1286
		1287
		1288
		1289
		1290
		1291
		1292
		1293
		1294
		1295
		1296
		1297
		1298
		1299
		1300
		1301
		1302
		1303
		1304
		1305
		1306
		1307
		1308
		1309
		1310
		1311
		1312
		1313
		1314
		1315
		1316
		1317
		1318
		1319
		1320
		1321
		1322
		1323
		1324
		1325
		1326
		1327
		1328
		1329
		1330
		1331
		1332
		1333
		1334
		1335
		1336
		1337
		1338
		1339
		1340
		1341
		1342
		1343
		1344
		1345
		1346
		1347
		1348
		1349
		1350
		1351
		1352
		1353
		1354
		1355
		1356
		1357
		1358
		1359
		1360
		1361
		1362
		1363
		1364
		1365
		1366
		1367
		1368
		1369
		1370
		1371
		1372
		1373
		1374
		1375
		1376
		1377
		1378
		1379
		1380
		1381
		1382
		1383
		1384
		1385
		1386
		1387
		1388
		1389
		1390
		1391
		1392
		1393
		1394
		1395
		1396
		1397
		1398
		1399
		1400
		1401
		1402
		1403
		1404
		1405
		1406
		1407
		1408
		1409
		1410
		1411
		1412
		1413
		1414
		1415
		1416
		1417
		1418
		1419
		1420
		1421
		1422
		1423
		1424
		1425
		1426
		1427
		1428
		1429
		1430
		1431
		1432
		1433
		1434
		1435
		1436
		1437
		1438
		1439
		1440
		1441
		1442
		1443
		1444
		1445
		1446
		1447
		1448
		1449
		1450
		1451
		1452
		1453
		1454
		1455
		1456
		1457
		1458
		1459
		1460
		1461
		1462
		1463
		1464
		1465
		1466
		1467
		1468
		1469
		1470
		1471
		1472
		1473
		1474
		1475
		1476
		1477
		1478
		1479
		1480
		1481
		1482
		1483
		1484
		1485
		1486
		1487
		1488
		1489
		1490
		1491
		1492
		1493
		1494
		1495
		1496
		1497
		1498
		1499
		1500
		1501
		1502
		1503
		1504
		1505
		1506
		1507
		1508
		1509
		1510
		1511
		1512
		1513
		1514
		1515
		1516
		1517
		1518
		1519
		1520
		1521
		1522
		1523
		1524
		1525
		1526
		1527
		1528
		1529
		1530
		1531
		1532
		1533
		1534
		1535
		1536
		1537
		1538
		1539
		1540
		1541
		1542
		1543
		1544
		1545
		1546
		1547
		1548
		1549
		1550
		1551
		1552
		1553
		1554
		1555
		1556
		1557
		1558
		1559
		1560
		1561
		1562
		1563
		1564
		1565
		1566
		1567
		1568
		1569
		1570
		1571
		1572
		1573
		1574
		1575
		1576
		1577
		1578
		1579
		1580
		1581
		1582
		1583
		1584
		1585
		1586
		1587
		1588
		1589
		1590
		1591
		1592
		1593
		1594
		1595
		1596
		1597
		1598
		1599
		1600
		1601
		1602
		1603
		1604
		1605
		1606
		1607
		1608
		1609
		1610
		1611
		1612
		1613
		1614
		1615
		1616
		1617
		1618
		1619
		1620
		1621
		1622
		1623
		1624
		1625
		1626
		1627
		1628
		1629
		1630
		1631
		1632
		1633
		1634
		1635
		1636
		1637
		1638
		1639
		1640
		1641
		1642
		1643
		1644
		1645
		1646
		1647
		1648
		1649
		1650
		1651
		1652
		1653
		1654
		1655
		1656
		1657
		1658
		1659
		1660
		1661
		1662
		1663
		1664
		1665
		1666
		1667
		1668
		1669
		1670
		1671
		1672
		1673
		1674
		1675
		1676
		1677
		1678
		1679
		1680
		1681
		1682
		1683
		1684
		1685
		1686
		1687
		1688
		1689
		1690
		1691
		1692
		1693
		1694
		1695
		1696
		1697
		1698
		1699
		1700
		1701
		1702
		1703
		1704
		1705
		1706
		1707
		1708
		1709
		1710
		1711
		1712
		1713
		1714
		1715
		1716
		1717
		1718
		1719
		1720
		1721
		1722
		1723
		1724
		1725
		1726
		1727
		1728
		1729
		1730
		1731
		1732
		1733
		1734
		1735
		1736
		1737
		1738
		1739
		1740
		1741
		1742
		1743
		1744
		1745
		1746
		1747
		1748
		1749
		1750
		1751
		1752
		1753
		1754
		1755
		1756
		1757
		1758
		1759
		1760
		1761
		1762
		1763
		1764
		1765
		1766
		1767
		1768
		1769
		1770
		1771
		1772
		1773
		1774
		1775
		1776
		1777
		1778
		1779
		1780
		1781
		1782
		1783
		1784
		1785
		1786
		1787
		1788
		1789
		1790
		1791
		1792
		1793
		1794
		1795
		1796
		1797
		1798
		1799
		1800
		1801
		1802
		1803
		1804
		1805
		1806
		1807
		1808
		1809
		1810
		1811
		1812
		1813
		1814
		1815
		1816
		1817
		1818
		1819
		1820
		1821
		1822
		1823
		1824
		1825
		1826
		1827
		1828
		1829
		1830
		1831
		1832
		1833
		1834
		1835
		1836
		1837
		1838
		1839
		1840
		1841
		1842
		1843
		1844
		1845
		1846
		1847
		1848
		1849
		1850
		1851
		1852
		1853
		1854
		1855
		1856
		1857
		1858
		1859
		1860
		1861
		1862
		1863
		1864
		1865
		1866
		1867
		1868
		1869
		1870
		1871
		1872
		1873
		1874
		1875
		1876
		1877
		1878
		1879
		1880
		1881
		1882
		1883
		1884
		1885
		1886
		1887
		1888
		1889
		1890
		1891
		1892
		1893
		1894
		1895
		1896
		1897
		1898
		1899
		1900
		1901
		1902
		1903
		1904
		1905
		1906
		1907
		1908
		1909
		1910
		1911
		1912
		1913
		1914
		1915
		1916
		1917
		1918
		1919
		1920
		1921
		1922
		1923
		1924
		1925
		1926
		1927
		1928
		1929
		1930
		1931
		1932
		1933
		1934
		1935
		1936
		1937
		1938
		1939
		1940
		1941
		1942
		1943
		1944
		1945
		1946
		1947
		1948
		1949
		1950
		1951
		1952
		1953
		1954
		1955
		1956
		1957
		1958
		1959
		1960
		1961
		1962
		1963
		1964
		1965
		1966
		1967
		1968
		1969
		1970
		1971
		1972
		1973
		1974
		1975
		1976
		1977
		1978
		1979
		1980
		1981
		1982
		1983
		1984
		1985
		1986
		1987
		1988
		1989
		1990
		1991
		1992
		1993
		1994
[truncated: 1,207 more rows]
[truncated: 79 more columns]

## Sheet: all UPRmt-Ome
	direct interactions							interactions over human orthologs								All Interactions (w.o. STRING DB)
	Protein A	Gene A	Protein B	Gene B	source	interaction		Protein A	Gene A	Protein B	Gene B	source	interaction			Protein A	Gene A	Protein B	Gene B	source	interaction
	Q23272	atfs-1	Q8IG69	CEBP-2	bioGrid	direct		P18848	atfs-1		CCDC106	bioGrid	human_orth			Q23272	atfs-1	G5ED85	g5ed85_caeel	IntAct	direct
	Q18825	bar-1	Q21227	apr-1	bioGrid	direct		P18848	atfs-1		DISC1	bioGrid	human_orth			P18848	atfs-1		CCDC106	bioGrid	human_orth
	Q18825	bar-1	G5EFK4	arf-3	bioGrid	direct		P18848	atfs-1		HAUS7	bioGrid	human_orth			P18848	atfs-1		DISC1	bioGrid	human_orth
	Q18825	bar-1	P58798	arx-6	bioGrid	direct		P18848	atfs-1		BATF3	bioGrid	human_orth			P18848	atfs-1		HAUS7	bioGrid	human_orth
	Q18825	bar-1	Q20053	asb-1	bioGrid	direct		P18848	atfs-1		BATF2	bioGrid	human_orth			P18848	atfs-1		BATF3	bioGrid	human_orth
	Q18825	bar-1	Q23158	atn-1	bioGrid	direct		P18848	atfs-1		BATF	bioGrid	human_orth			P18848	atfs-1		BATF2	bioGrid	human_orth
	Q18825	bar-1	P46561	atp-2	bioGrid	direct		P18848	atfs-1		CREBZF	bioGrid	human_orth			P18848	atfs-1		BATF	bioGrid	human_orth
	Q18825	bar-1	Q3LRZ3	axl-1	bioGrid	direct		P18848	atfs-1		ASB7	bioGrid	human_orth			P18848	atfs-1		CREBZF	bioGrid	human_orth
	Q18825	bar-1	P42000	B0280.9	bioGrid	direct		P18848	atfs-1		DNMT3L	bioGrid	human_orth			P18848	atfs-1		ASB7	bioGrid	human_orth
	Q18825	bar-1	Q10950	B0361.6	bioGrid	direct		P18848	atfs-1		BFSP2	bioGrid	human_orth			P18848	atfs-1		DNMT3L	bioGrid	human_orth
	Q18825	bar-1	Q17495	B0393.6	bioGrid	direct		P18848	atfs-1		MDM2	bioGrid	human_orth			P18848	atfs-1		BFSP2	bioGrid	human_orth
	Q18825	bar-1	Q18825	apr-1	bioGrid	direct		P18848	atfs-1		EGLN2	bioGrid	human_orth			P18848	atfs-1		MDM2	bioGrid	human_orth
	Q18825	bar-1	Q22592	bec-1	bioGrid	direct		P18848	atfs-1		RNF4	bioGrid	human_orth			P18848	atfs-1		EGLN2	bioGrid	human_orth
	Q18825	bar-1	Q95QU0	C27F2.10	bioGrid	direct		P18848	atfs-1		GOLGA8EP	bioGrid	human_orth			P18848	atfs-1		RNF4	bioGrid	human_orth
	Q18825	bar-1	Q18257	C27F2.4	bioGrid	direct		P18848	atfs-1		GOLGA8F	bioGrid	human_orth			P18848	atfs-1		GOLGA8EP	bioGrid	human_orth
	Q18825	bar-1	Q18421	C34C12.8	bioGrid	direct		P18848	atfs-1		GPS2	bioGrid	human_orth			P18848	atfs-1		GOLGA8F	bioGrid	human_orth
	Q18825	bar-1	Q18485	C35D10.5	bioGrid	direct		P18848	atfs-1		LDOC1	bioGrid	human_orth			P18848	atfs-1		GPS2	bioGrid	human_orth
	Q18825	bar-1	Q18481	C35D10.8	bioGrid	direct		P18848	atfs-1		MPZL2	bioGrid	human_orth			P18848	atfs-1		LDOC1	bioGrid	human_orth
	Q18825	bar-1	Q18493	C36A4.4	bioGrid	direct		P18848	atfs-1		SRA1	bioGrid	human_orth			P18848	atfs-1		MPZL2	bioGrid	human_orth
	Q18825	bar-1	P48322	C36E8.1	bioGrid	direct		P18848	atfs-1		TGM2	bioGrid	human_orth			P18848	atfs-1		SRA1	bioGrid	human_orth
	Q18825	bar-1	Q09278	C45G9.5	bioGrid	direct		P18848	atfs-1		TRIM24	bioGrid	human_orth			P18848	atfs-1		TGM2	bioGrid	human_orth
	Q18825	bar-1	Q09252	ccdc-55	bioGrid	direct		P18848	atfs-1		ZNF212	bioGrid	human_orth			P18848	atfs-1		TRIM24	bioGrid	human_orth
	Q18825	bar-1	Q95QW4	cdf-1	bioGrid	direct		P18848	atfs-1		aph-1	bioGrid	human_orth			P18848	atfs-1		ZNF212	bioGrid	human_orth
	Q18825	bar-1	P46551	cdk-12	bioGrid	direct		P18848	atfs-1		apl-1	bioGrid	human_orth			P18848	atfs-1		aph-1	bioGrid	human_orth
	Q18825	bar-1	Q18273	ceh-43	bioGrid	direct		P18848	atfs-1		atfs-1	bioGrid	human_orth			P18848	atfs-1		apl-1	bioGrid	human_orth
	Q18825	bar-1	Q9N4L2	ceh-45	bioGrid	direct		P18848	atfs-1		baz-2	bioGrid	human_orth			P18848	atfs-1		atfs-1	bioGrid	human_orth
	Q18825	bar-1	Q9N3Z3	chk-1	bioGrid	direct		P18848	atfs-1		cbp-2	bioGrid	human_orth			P18848	atfs-1		baz-2	bioGrid	human_orth
	Q18825	bar-1		clec-152	bioGrid	direct		P18848	atfs-1		cebp-1	bioGrid	human_orth			P18848	atfs-1		cbp-2	bioGrid	human_orth
	Q18825	bar-1	Q95YE9	clk-2	bioGrid	direct		P18848	atfs-1		cebp-1	bioGrid	human_orth			P18848	atfs-1		cebp-1	bioGrid	human_orth
	Q18825	bar-1	Q9N3D7	col-48	bioGrid	direct		P18848	atfs-1		cebp-1	bioGrid	human_orth			P18848	atfs-1		cebp-1	bioGrid	human_orth
	Q18825	bar-1	P55216	cth-2	bioGrid	direct		P18848	atfs-1		cebp-2	bioGrid	human_orth			P18848	atfs-1		cebp-1	bioGrid	human_orth
	Q18825	bar-1	Q18853	cyc-1	bioGrid	direct		P18848	atfs-1		crh-1	bioGrid	human_orth			P18848	atfs-1		cebp-2	bioGrid	human_orth
	Q18825	bar-1	O01501	cye-1	bioGrid	direct		P18848	atfs-1		egl-9	bioGrid	human_orth			P18848	atfs-1		crh-1	bioGrid	human_orth
	Q18825	bar-1	O16850	daf-16	bioGrid	direct		P18848	atfs-1		ehs-1	bioGrid	human_orth			P18848	atfs-1		egl-9	bioGrid	human_orth
	Q18825	bar-1	Q968Y9	daf-2	bioGrid	direct		P18848	atfs-1		eif-2A	bioGrid	human_orth			P18848	atfs-1		ehs-1	bioGrid	human_orth
	Q18825	bar-1	Q9U3C8	dcn-1	bioGrid	direct		P18848	atfs-1		F19B2.6	bioGrid	human_orth			P18848	atfs-1		eif-2A	bioGrid	human_orth
	Q18825	bar-1	Q9TXI3	did-2	bioGrid	direct		P18848	atfs-1		F19B2.6	bioGrid	human_orth			P18848	atfs-1		F19B2.6	bioGrid	human_orth
	Q18825	bar-1	Q20497	dpy-22	bioGrid	direct		P18848	atfs-1		fos-1	bioGrid	human_orth			P18848	atfs-1		F19B2.6	bioGrid	human_orth
	Q18825	bar-1	P48996	dpy-27	bioGrid	direct		P18848	atfs-1		fos-1	bioGrid	human_orth			P18848	atfs-1		fos-1	bioGrid	human_orth
	Q18825	bar-1	Q18239	dsh-2	bioGrid	direct		P18848	atfs-1		fos-1	bioGrid	human_orth			P18848	atfs-1		fos-1	bioGrid	human_orth
	Q18825	bar-1	Q20971	dsl-5	bioGrid	direct		P18848	atfs-1		gbb-1	bioGrid	human_orth			P18848	atfs-1		fos-1	bioGrid	human_orth
	Q18825	bar-1	Q20852	egas-4	bioGrid	direct		P18848	atfs-1		gbb-2	bioGrid	human_orth			P18848	atfs-1		gbb-1	bioGrid	human_orth
	Q18825	bar-1	Q10656	egl-15	bioGrid	direct		P18848	atfs-1		gcc-2	bioGrid	human_orth			P18848	atfs-1		gbb-2	bioGrid	human_orth
	Q18825	bar-1	G5EGF4	egl-18	bioGrid	direct		P18848	atfs-1		gtf-2F2	bioGrid	human_orth			P18848	atfs-1		gcc-2	bioGrid	human_orth
	Q18825	bar-1	P34703	emb-5	bioGrid	direct		P18848	atfs-1		hxk-3	bioGrid	human_orth			P18848	atfs-1		gtf-2F2	bioGrid	human_orth
	Q18825	bar-1	Q09590	emb-8	bioGrid	direct		P18848	atfs-1		ifa-1	bioGrid	human_orth			P18848	atfs-1		hxk-3	bioGrid	human_orth
	Q18825	bar-1	G5EEV6	epi-1	bioGrid	direct		P18848	atfs-1		ipla-7	bioGrid	human_orth			P18848	atfs-1		ifa-1	bioGrid	human_orth
	Q18825	bar-1	G5EC05	evl-14	bioGrid	direct		P18848	atfs-1		let-630	bioGrid	human_orth			P18848	atfs-1		ipla-7	bioGrid	human_orth
	Q18825	bar-1	Q20051	F35G12.7	bioGrid	direct		P18848	atfs-1		lin-23	bioGrid	human_orth			P18848	atfs-1		let-630	bioGrid	human_orth
	Q18825	bar-1	Q20124	F37C12.1	bioGrid	direct		P18848	atfs-1		lin-23	bioGrid	human_orth			P18848	atfs-1		lin-23	bioGrid	human_orth
	Q18825	bar-1	Q5FC73	F54D5.5	bioGrid	direct		P18848	atfs-1		maf-1	bioGrid	human_orth			P18848	atfs-1		lin-23	bioGrid	human_orth
	Q18825	bar-1	Q20865	F56C9.7	bioGrid	direct		P18848	atfs-1		maf-1	bioGrid	human_orth			P18848	atfs-1		maf-1	bioGrid	human_orth
	Q18825	bar-1	P17221	fem-1	bioGrid	direct		P18848	atfs-1		mek-1	bioGrid	human_orth			P18848	atfs-1		maf-1	bioGrid	human_orth
	Q18825	bar-1	Q19802	fkh-5	bioGrid	direct		P18848	atfs-1		mel-32	bioGrid	human_orth			P18848	atfs-1		mek-1	bioGrid	human_orth
	Q18825	bar-1	Q9TYS3	ftn-2	bioGrid	direct		P18848	atfs-1		ndc-80	bioGrid	human_orth			P18848	atfs-1		mel-32	bioGrid	human_orth
	Q18825	bar-1	Q20655	ftt-2	bioGrid	direct		P18848	atfs-1		nekl-3	bioGrid	human_orth			P18848	atfs-1		ndc-80	bioGrid	human_orth
	Q18825	bar-1	O17214	fum-1	bioGrid	direct		P18848	atfs-1		nipi-3	bioGrid	human_orth			P18848	atfs-1		nekl-3	bioGrid	human_orth
	Q18825	bar-1	Q17339	gld-1	bioGrid	direct		P18848	atfs-1		nxf-1	bioGrid	human_orth			P18848	atfs-1		nipi-3	bioGrid	human_orth
	Q18825	bar-1	P34689	glh-1	bioGrid	direct		P18848	atfs-1		pqn-51	bioGrid	human_orth			P18848	atfs-1		nxf-1	bioGrid	human_orth
	Q18825	bar-1	P13508	glp-1	bioGrid	direct		P18848	atfs-1		rpb-3	bioGrid	human_orth			P18848	atfs-1		pqn-51	bioGrid	human_orth
	Q18825	bar-1	P46576	gop-3	bioGrid	direct		P18848	atfs-1		rps-6	bioGrid	human_orth			P18848	atfs-1		rpb-3	bioGrid	human_orth
	Q18825	bar-1	G5EBS1	gro-1	bioGrid	direct		P18848	atfs-1		skn-1	bioGrid	human_orth			P18848	atfs-1		rps-6	bioGrid	human_orth
	Q18825	bar-1	Q22843	grsp-2	bioGrid	direct		P18848	atfs-1		skn-1	bioGrid	human_orth			P18848	atfs-1		skn-1	bioGrid	human_orth
	Q18825	bar-1	Q9U2Q9	gsk-3	bioGrid	direct		P18848	atfs-1		smc-3	bioGrid	human_orth			P18848	atfs-1		skn-1	bioGrid	human_orth
	Q18825	bar-1	O76672	H34I24.2	bioGrid	direct		P18848	atfs-1		snap-29	bioGrid	human_orth			P18848	atfs-1		smc-3	bioGrid	human_orth
	Q18825	bar-1	O17695	hda-1	bioGrid	direct		P18848	atfs-1		T05G5.9	bioGrid	human_orth			P18848	atfs-1		snap-29	bioGrid	human_orth
	Q18825	bar-1	Q17796	hgrs-1	bioGrid	direct		P18848	atfs-1		tbc-15	bioGrid	human_orth			P18848	atfs-1		T05G5.9	bioGrid	human_orth
	Q18825	bar-1	P08898	his-2	bioGrid	direct		P18848	atfs-1		tbp-1	bioGrid	human_orth			P18848	atfs-1		tbc-15	bioGrid	human_orth
	Q18825	bar-1	Q27489	his-69	bioGrid	direct		P18848	atfs-1		ttb-1	bioGrid	human_orth			P18848	atfs-1		tbp-1	bioGrid	human_orth
	Q18825	bar-1	Q27894	his-8	bioGrid	direct		P18848	atfs-1		W02F12.4	bioGrid	human_orth			P18848	atfs-1		ttb-1	bioGrid	human_orth
	Q18825	bar-1	Q09390	hmg-1.2	bioGrid	direct		P18848	atfs-1		Y106G6D.5	bioGrid	human_orth			P18848	atfs-1		W02F12.4	bioGrid	human_orth
	Q18825	bar-1	P41848	hmg-4	bioGrid	direct		P18848	atfs-1		Y55F3AM.14	bioGrid	human_orth			P18848	atfs-1		Y106G6D.5	bioGrid	human_orth
	Q18825	bar-1	Q19207	hmgr-1	bioGrid	direct		P18848	atfs-1		ZC376.3	bioGrid	human_orth			P18848	atfs-1		Y55F3AM.14	bioGrid	human_orth
	Q18825	bar-1	O44326	hmp-2	bioGrid	direct		P18848	atfs-1		ZK697.8	bioGrid	human_orth			P18848	atfs-1		ZC376.3	bioGrid	human_orth
	Q18825	bar-1	G5EFT5	hsf-1	bioGrid	direct		P18848	atfs-1		RPT5	bioGrid	human_orth			P18848	atfs-1		ZK697.8	bioGrid	human_orth
	Q18825	bar-1	Q18885	icd-1	bioGrid	direct		Q9Y2D1	atfs-1		DISC1	bioGrid	human_orth			P18848	atfs-1		RPT5	bioGrid	human_orth
	Q18825	bar-1	G5EFH1	ins-17	bioGrid	direct		Q9Y2D1	atfs-1		gbb-1	bioGrid	human_orth			Q9Y2D1	atfs-1		DISC1	bioGrid	human_orth
	Q18825	bar-1	Q9Y0A1	itr-1	bioGrid	direct		Q9Y2D1	atfs-1		ubc-3	bioGrid	human_orth			Q9Y2D1	atfs-1		gbb-1	bioGrid	human_orth
	Q18825	bar-1	Q21234	K04G7.1	bioGrid	direct		Q9Y2D1	atfs-1		nipi-3	bioGrid	human_orth			Q9Y2D1	atfs-1		ubc-3	bioGrid	human_orth
	Q18825	bar-1	P28548	kin-10	bioGrid	direct		Q9Y2D1	atfs-1		ubc-3	bioGrid	human_orth			Q9Y2D1	atfs-1		nipi-3	bioGrid	human_orth
	Q18825	bar-1	G5EFD2	ksr-1	bioGrid	direct		Q9Y2D1	atfs-1		FBXO7	bioGrid	human_orth			Q9Y2D1	atfs-1		ubc-3	bioGrid	human_orth
	Q18825	bar-1	G5EDU7	lag-1	bioGrid	direct		Q9Y2D1	atfs-1		cyd-1	bioGrid	human_orth			Q9Y2D1	atfs-1		FBXO7	bioGrid	human_orth
	Q18825	bar-1	Q18823	lam-2	bioGrid	direct		Q9Y2D1	atfs-1		git-1	bioGrid	human_orth			Q9Y2D1	atfs-1		cyd-1	bioGrid	human_orth
	Q18825	bar-1	G5ECE3	lam-3	bioGrid	direct		Q9Y2D1	atfs-1		nipi-3	bioGrid	human_orth			Q9Y2D1	atfs-1		git-1	bioGrid	human_orth
	Q18825	bar-1	Q09996	lars-1	bioGrid	direct		P14923	bar-1		CDH1	bioGrid	human_orth			Q9Y2D1	atfs-1		nipi-3	bioGrid	human_orth
	Q18825	bar-1	P92199	let-502	bioGrid	direct		P14923	bar-1		Dsc1	bioGrid	human_orth			P18848	atfs-1	Q96BI3	aph-1	Mentha	human_orth
	Q18825	bar-1	P22981	let-60	bioGrid	direct		P14923	bar-1		DSG2	bioGrid	human_orth			P18848	atfs-1	P05067	apl-1	Mentha	human_orth
	Q18825	bar-1	Q11184	let-756	bioGrid	direct		P14923	bar-1		CDH3	bioGrid	human_orth			P18848	atfs-1	Q9H672	ASB7	Mentha	human_orth
	Q18825	bar-1	Q09990	lin-23	bioGrid	direct		P14923	bar-1		CDH5	bioGrid	human_orth			P18848	atfs-1	P15336	atf-7	Mentha	human_orth
	Q18825	bar-1	G5EGB2	lin-29	bioGrid	direct		P14923	bar-1		CDH2	bioGrid	human_orth			P18848	atfs-1	P18848	atfs-1	Mentha	human_orth
	Q18825	bar-1	Q03345	lin-3	bioGrid	direct		P14923	bar-1		PTPN14	bioGrid	human_orth			P18848	atfs-1	Q16520	BATF	Mentha	human_orth
	Q18825	bar-1	G5EDT1	lin-35	bioGrid	direct		P14923	bar-1		DSG3	bioGrid	human_orth			P18848	atfs-1	Q8N1L9	BATF2	Mentha	human_orth
	Q18825	bar-1	A5PEX5	lin-7	bioGrid	direct		P14923	bar-1		DSC2	bioGrid	human_orth			P18848	atfs-1	Q9NR55	BATF3	Mentha	human_orth
	Q18825	bar-1	Q04833	lrp-1	bioGrid	direct		P14923	bar-1		GJB1	bioGrid	human_orth			P18848	atfs-1	Q92831	baz-2	Mentha	human_orth
	Q18825	bar-1	Q21452	M01F1.3	bioGrid	direct		P14923	bar-1		DSC3	bioGrid	human_orth			P18848	atfs-1	Q13515	BFSP2	Mentha	human_orth
	Q18825	bar-1	G5EFM0	mdf-1	bioGrid	direct		P14923	bar-1		PECAM1	bioGrid	human_orth			P18848	atfs-1	Q92793	cbp-2	Mentha	human_orth
	Q18825	bar-1	Q21127	meg-2	bioGrid	direct		P14923	bar-1		DSG1	bioGrid	human_orth			P18848	atfs-1	Q09472	cbp-2	Mentha	human_orth
	Q18825	bar-1	O44740	mei-2	bioGrid	direct		P14923	bar-1		USP1	bioGrid	human_orth			P18848	atfs-1	Q9BWC9	CCDC106	Mentha	human_orth
	Q18825	bar-1	G5EEB3	mel-11	bioGrid	direct		P14923	bar-1		INSIG2	bioGrid	human_orth			P18848	atfs-1	P49715	cebp-1	Mentha	human_orth
	Q18825	bar-1	G5EBL2	mes-1	bioGrid	direct		P14923	bar-1		DES	bioGrid	human_orth			P18848	atfs-1	Q15744	cebp-1	Mentha	human_orth
	Q18825	bar-1	Q9XUB2	mex-5	bioGrid	direct		P14923	bar-1		CSDE1	bioGrid	human_orth			P18848	atfs-1	P53567	cebp-2	Mentha	human_orth
	Q18825	bar-1	P41846	mml-1	bioGrid	direct		P14923	bar-1		CDH10	bioGrid	human_orth			P18848	atfs-1	Q9Y592	CEP83	Mentha	human_orth
	Q18825	bar-1	O45244	mog-4	bioGrid	direct		P14923	bar-1		CUL7	bioGrid	human_orth			P18848	atfs-1	Q9NS37	CREBZF	Mentha	human_orth
	Q18825	bar-1	Q09530	mog-5	bioGrid	direct		P14923	bar-1		CCDC8	bioGrid	human_orth			P18848	atfs-1	O43889	crh-1	Mentha	human_orth
	Q18825	bar-1	Q22329	mom-1	bioGrid	direct		P14923	bar-1		RAD51AP1	bioGrid	human_orth			P18848	atfs-1	P35638	DDIT3	Mentha	human_orth
	Q18825	bar-1	Q10459	mom-2	bioGrid	direct		P14923	bar-1		CEP128	bioGrid	human_orth			P18848	atfs-1	Q9NRI5	DISC1	Mentha	human_orth
	Q18825	bar-1	A0A0K3AWM6	mom-5	bioGrid	direct		P14923	bar-1		AXIN1	bioGrid	human_orth			P18848	atfs-1	Q9UJW3	DNMT3L	Mentha	human_orth
	Q18825	bar-1	Q23243	morc-1	bioGrid	direct		P14923	bar-1		SYNPO	bioGrid	human_orth			P18848	atfs-1	Q9H6Z9	egl-9	Mentha	human_orth
	Q18825	bar-1	P39745	mpk-1	bioGrid	direct		P14923	bar-1		LIMA1	bioGrid	human_orth			P18848	atfs-1	Q96D71	ehs-1	Mentha	human_orth
	Q18825	bar-1	Q22140	mrpl-16	bioGrid	direct		P14923	bar-1		Flot1	bioGrid	human_orth			P18848	atfs-1	Q9BY44	eif-2A	Mentha	human_orth
	Q18825	bar-1	Q6A575	mrpl-21	bioGrid	direct		P14923	bar-1		Nhsl1	bioGrid	human_orth			P18848	atfs-1	P05412	F19B2.6	Mentha	human_orth
	Q18825	bar-1	Q21601	mrps-34	bioGrid	direct		P14923	bar-1		Cobll1	bioGrid	human_orth			P18848	atfs-1	P17275	F19B2.6	Mentha	human_orth
	Q18825	bar-1	P34576	mua-3	bioGrid	direct		P14923	bar-1		GPATCH2L	bioGrid	human_orth			P18848	atfs-1	P01100	fos-1	Mentha	human_orth
	Q18825	bar-1	Q21281	mup-4	bioGrid	direct		P14923	bar-1		CDH8	bioGrid	human_orth			P18848	atfs-1	P15407	fos-1	Mentha	human_orth
	Q18825	bar-1	Q9TYU5	mys-1	bioGrid	direct		P14923	bar-1		NPPA	bioGrid	human_orth			P18848	atfs-1	Q9UBS5	gbb-1	Mentha	human_orth
	Q18825	bar-1	G5EF61	ndg-4	bioGrid	direct		P14923	bar-1		PDE4DIP	bioGrid	human_orth			P18848	atfs-1	O75899	gbb-2	Mentha	human_orth
	Q18825	bar-1	Q23489	nhr-9	bioGrid	direct		P14923	bar-1		OAZ3	bioGrid	human_orth			P18848	atfs-1	Q92805	gcc-2	Mentha	human_orth
	Q18825	bar-1	G5EED4	nipi-3	bioGrid	direct		P14923	bar-1		BRF2	bioGrid	human_orth			P18848	atfs-1	Q08AF8	golg-2	Mentha	human_orth
	Q18825	bar-1	Q18224	ntl-9	bioGrid	direct		P14923	bar-1		TRIM14	bioGrid	human_orth			P18848	atfs-1	Q0D2H9	GOLGA8DP	Mentha	human_orth
	Q18825	bar-1	O18236	nuo-3	bioGrid	direct		P14923	bar-1		RNF4	bioGrid	human_orth			P18848	atfs-1	Q13227	GPS2	Mentha	human_orth
	Q18825	bar-1	Q9N4Y8	nuo-5	bioGrid	direct		P14923	bar-1		MYC	bioGrid	human_orth			P18848	atfs-1	P13984	gtf-2F2	Mentha	human_orth
	Q18825	bar-1	Q23098	nuo-6	bioGrid	direct		P14923	bar-1		NEK2	bioGrid	human_orth			P18848	atfs-1	Q99871	HAUS7	Mentha	human_orth
	Q18825	bar-1	O18158	ogt-1	bioGrid	direct		P14923	bar-1		KRT17	bioGrid	human_orth			P18848	atfs-1	P52790	hxk-3	Mentha	human_orth
	Q18825	bar-1	P34766	pal-1	bioGrid	direct		P14923	bar-1		METTL14	bioGrid	human_orth			P18848	atfs-1	P20700	ifa-1	Mentha	human_orth
	Q18825	bar-1	Q9U3A0	pan-1	bioGrid	direct		P14923	bar-1		NFATC4	bioGrid	human_orth			P18848	atfs-1	P25963	ipla-7	Mentha	human_orth
	Q18825	bar-1	H2L089	par-2	bioGrid	direct		P14923	bar-1		NFKBIE	bioGrid	human_orth			P18848	atfs-1	O95751	LDOC1	Mentha	human_orth
	Q18825	bar-1	P41932	par-5	bioGrid	direct		P14923	bar-1		RIBC2	bioGrid	human_orth			P18848	atfs-1	Q96EY7	let-630	Mentha	human_orth
	Q18825	bar-1	Q9NAN2	par-6	bioGrid	direct		P14923	bar-1		YWHAE	bioGrid	human_orth			P18848	atfs-1	A0A0S2Z507	lin-23	Mentha	human_orth
	Q18825	bar-1	Q27874	pat-3	bioGrid	direct		P14923	bar-1		aagr-2	bioGrid	human_orth			P18848	atfs-1	B7Z3H4	lin-23	Mentha	human_orth
	Q18825	bar-1	G5ED66	pax-3	bioGrid	direct		P14923	bar-1		abce-1	bioGrid	human_orth			P18848	atfs-1	Q9UKB1	lin-23	Mentha	human_orth
	Q18825	bar-1	Q09345	pcf-11	bioGrid	direct		P14923	bar-1		ahcy-1	bioGrid	human_orth			P18848	atfs-1	O75444	maf-1	Mentha	human_orth
	Q18825	bar-1	Q17770	pdi-2	bioGrid	direct		P14923	bar-1		aka-1	bioGrid	human_orth			P18848	atfs-1	Q9Y5Q3	maf-1	Mentha	human_orth
	Q18825	bar-1	Q17381	pha-4	bioGrid	direct		P14923	bar-1		aldo-2	bioGrid	human_orth			P18848	atfs-1	Q00987	MDM2	Mentha	human_orth
	Q18825	bar-1	Q94131	pie-1	bioGrid	direct		P14923	bar-1		apr-1	bioGrid	human_orth			P18848	atfs-1	O14733	mek-1	Mentha	human_orth
	Q18825	bar-1	G5EFI8	plc-1	bioGrid	direct		P14923	bar-1		ard-1	bioGrid	human_orth			P18848	atfs-1	P34897	mel-32	Mentha	human_orth
	Q18825	bar-1	Q3V5K0	plx-1	bioGrid	direct		P14923	bar-1		bar-1	bioGrid	human_orth			P18848	atfs-1	O60487	MPZL2	Mentha	human_orth
	Q18825	bar-1	H2KYP7	pnk-1	bioGrid	direct		P14923	bar-1		bir-2	bioGrid	human_orth			P18848	atfs-1	O14777	ndc-80	Mentha	human_orth
	Q18825	bar-1	Q10666	pop-1	bioGrid	direct		P14923	bar-1		bre-4	bioGrid	human_orth			P18848	atfs-1	Q9HC98	nekl-3	Mentha	human_orth
	Q18825	bar-1	G5EF15	pos-1	bioGrid	direct		P14923	bar-1		C14C10.4	bioGrid	human_orth			P18848	atfs-1	Q96RU7	nipi-3	Mentha	human_orth
	Q18825	bar-1	Q9U207	pqn-87	bioGrid	direct		P14923	bar-1		C24G6.8	bioGrid	human_orth			P18848	atfs-1	Q9UBU9	nxf-1	Mentha	human_orth
	Q18825	bar-1	Q18426	prx-5	bioGrid	direct		P14923	bar-1		C31C9.2	bioGrid	human_orth			P18848	atfs-1	Q9UNN4	pqn-51	Mentha	human_orth
	Q18825	bar-1	O62090	pry-1	bioGrid	direct		P14923	bar-1		C34F6.10	bioGrid	human_orth			P18848	atfs-1	P19387	rpb-3	Mentha	human_orth
	Q18825	bar-1	Q21649	R02F2.7	bioGrid	direct		P14923	bar-1		C37A2.7	bioGrid	human_orth			P18848	atfs-1	P62753	rps-6	Mentha	human_orth
	Q18825	bar-1	Q21821	R07E5.7	bioGrid	direct		P14923	bar-1		C52E12.1	bioGrid	human_orth			P18848	atfs-1	Q86UD0	SAPCD2	Mentha	human_orth
	Q18825	bar-1	Q21905	R10E4.9	bioGrid	direct		P14923	bar-1		cap-2	bioGrid	human_orth			P18848	atfs-1	Q16236	skn-1	Mentha	human_orth
	Q18825	bar-1	O44191	rme-2	bioGrid	direct		P14923	bar-1		cbp-2	bioGrid	human_orth			P18848	atfs-1	Q16621	sknr-1	Mentha	human_orth
	Q18825	bar-1	Q21832	rnp-4	bioGrid	direct		P14923	bar-1		cbp-2	bioGrid	human_orth			P18848	atfs-1	Q07065	smc-3	Mentha	human_orth
	Q18825	bar-1	P42170	rnr-2	bioGrid	direct		P14923	bar-1		cdc-73	bioGrid	human_orth			P18848	atfs-1	O95721	snap-29	Mentha	human_orth
	Q18825	bar-1	Q19826	rpb-8	bioGrid	direct		P14923	bar-1		cdk-1	bioGrid	human_orth			P18848	atfs-1	Q96NT1	spr-2	Mentha	human_orth
	Q18825	bar-1	Q27492	rpc-2	bioGrid	direct		P14923	bar-1		cdk-2	bioGrid	human_orth			P18848	atfs-1	Q9HD15	SRA1	Mentha	human_orth
	Q18825	bar-1	P46769	rps-0	bioGrid	direct		P14923	bar-1		ced-9	bioGrid	human_orth			P18848	atfs-1	Q96CN9	T05G5.9	Mentha	human_orth
	Q18825	bar-1	P49196	rps-12	bioGrid	direct		P14923	bar-1		cft-1	bioGrid	human_orth			P18848	atfs-1	A2RTX5	TARSL2	Mentha	human_orth
	Q18825	bar-1	P49197	rps-21	bioGrid	direct		P14923	bar-1		chc-1	bioGrid	human_orth			P18848	atfs-1	Q3MII6	tbc-15	Mentha	human_orth
	Q18825	bar-1	Q09260	sel-8	bioGrid	direct		P14923	bar-1		chd-3	bioGrid	human_orth			P18848	atfs-1	P20226	tbp-1	Mentha	human_orth
	Q18825	bar-1	P29355	sem-5	bioGrid	direct		P14923	bar-1		chd-3	bioGrid	human_orth			P18848	atfs-1	P21980	TGM2	Mentha	human_orth
	Q18825	bar-1	P41830	sex-1	bioGrid	direct		P14923	bar-1		cku-70	bioGrid	human_orth			P18848	atfs-1	O15164	TRIM24	Mentha	human_orth
	Q18825	bar-1	Q09488	sma-6	bioGrid	direct		P14923	bar-1		cku-80	bioGrid	human_orth			P18848	atfs-1	Q00403	ttb-1	Mentha	human_orth
	Q18825	bar-1	Q20060	smc-4	bioGrid	direct		P14923	bar-1		cmd-1	bioGrid	human_orth			P18848	atfs-1	Q9BXS5	unc-101	Mentha	human_orth
	Q18825	bar-1	P55853	smo-1	bioGrid	direct		P14923	bar-1		cnp-2	bioGrid	human_orth			P18848	atfs-1	Q9BQ50	W02F12.4	Mentha	human_orth
	Q18825	bar-1	Q21831	snfc-5	bioGrid	direct		P14923	bar-1		copd-1	bioGrid	human_orth			P18848	atfs-1	Q9HCE1	Y106G6D.5	Mentha	human_orth
	Q18825	bar-1	Q22875	soc-2	bioGrid	direct		P14923	bar-1		coq-2	bioGrid	human_orth			P18848	atfs-1	Q9NYT6	Y55F3AM.14	Mentha	human_orth
	Q18825	bar-1	Q9N5D3	sos-1	bioGrid	direct		P14923	bar-1		cor-1	bioGrid	human_orth			P18848	atfs-1	Q9NZ94	ZC376.3	Mentha	human_orth
	Q18825	bar-1	P91870	spd-2	bioGrid	direct		P14923	bar-1		cri-3	bioGrid	human_orth			P18848	atfs-1	Q8WYK2	zip-6	Mentha	human_orth
	Q18825	bar-1	G5EF02	spn-4	bioGrid	direct		P14923	bar-1		csn-5	bioGrid	human_orth			P18848	atfs-1	P02766	ZK697.8	Mentha	human_orth
	Q18825	bar-1	G5EDR3	sur-6	bioGrid	direct		P14923	bar-1		ctl-1	bioGrid	human_orth			P18848	atfs-1	Q9UDV6	ZNF212	Mentha	human_orth
	Q18825	bar-1	Q9XVI2	sys-1	bioGrid	direct		P14923	bar-1		cul-2	bioGrid	human_orth			Q96AQ3	atfs-1	Q99871	HAUS7	Mentha	human_orth
	Q18825	bar-1	Q9N537	szy-2	bioGrid	direct		P14923	bar-1		cul-5	bioGrid	human_orth			Q9Y2D1	atfs-1	Q09472	cbp-2	Mentha	human_orth
	Q18825	bar-1	Q9N5E4	T02H6.11	bioGrid	direct		P14923	bar-1		cyld-1	bioGrid	human_orth			Q9Y2D1	atfs-1	P49715	cebp-1	Mentha	human_orth
	Q18825	bar-1	Q22137	T04A8.7	bioGrid	direct		P14923	bar-1		D2096.11	bioGrid	human_orth			Q9Y2D1	atfs-1	Q15744	cebp-1	Mentha	human_orth
	Q18825	bar-1	G5EBK0	T08A11.1	bioGrid	direct		P14923	bar-1		D2096.11	bioGrid	human_orth			Q9Y2D1	atfs-1	P53567	cebp-2	Mentha	human_orth
	Q18825	bar-1	P41843	T20B12.3	bioGrid	direct		P14923	bar-1		daf-18	bioGrid	human_orth			Q9Y2D1	atfs-1	Q14161	cnt-1	Mentha	human_orth
	Q18825	bar-1	P41847	T20B12.7	bioGrid	direct		P14923	bar-1		daf-2	bioGrid	human_orth			Q9Y2D1	atfs-1	P30281	cyd-1	Mentha	human_orth
	Q18825	bar-1	Q22619	T20H4.5	bioGrid	direct		P14923	bar-1		daf-21	bioGrid	human_orth			Q9Y2D1	atfs-1	Q9NRI5	DISC1	Mentha	human_orth
	Q18825	bar-1	P52275	tbb-2	bioGrid	direct		P14923	bar-1		daf-4	bioGrid	human_orth			Q9Y2D1	atfs-1	Q14232	eif-2Balpha	Mentha	human_orth
	Q18825	bar-1	P32085	tbp-1	bioGrid	direct		P14923	bar-1		dhp-1	bioGrid	human_orth			Q9Y2D1	atfs-1	Q9UBS5	gbb-1	Mentha	human_orth
	Q18825	bar-1	Q9U1W1	tfg-1	bioGrid	direct		P14923	bar-1		dlc-1	bioGrid	human_orth			Q9Y2D1	atfs-1	Q08AF8	golg-2	Mentha	human_orth
	Q18825	bar-1	Q22093	tftc-5	bioGrid	direct		P14923	bar-1		dld-1	bioGrid	human_orth			Q9Y2D1	atfs-1	Q13227	GPS2	Mentha	human_orth
	Q18825	bar-1	Q18264	tmem-131	bioGrid	direct		P14923	bar-1		ebp-1	bioGrid	human_orth			Q9Y2D1	atfs-1	P54253	K04F10.1	Mentha	human_orth
	Q18825	bar-1	Q18490	tost-1	bioGrid	direct		P14923	bar-1		eef-1A.2	bioGrid	human_orth			Q9Y2D1	atfs-1	Q16204	T09B9.4	Mentha	human_orth
	Q18825	bar-1	G5EEV2	trr-1	bioGrid	direct		P14923	bar-1		eef-2	bioGrid	human_orth			Q9Y2D1	atfs-1	Q96RU7	TRIB3	Mentha	human_orth
	Q18825	bar-1	P0CG71	ubq-1	bioGrid	direct		P14923	bar-1		egl-13	bioGrid	human_orth			Q9Y2D1	atfs-1	P49427	ubc-3	Mentha	human_orth
	Q18825	bar-1	P98080	ucr-1	bioGrid	direct		P14923	bar-1		erm-1	bioGrid	human_orth			Q9Y2D1	atfs-1	P02766	ZK697.8	Mentha	human_orth
	Q18825	bar-1	Q09353	ulp-1	bioGrid	direct		P14923	bar-1		exo-3	bioGrid	human_orth			Q23272	atfs-1	Q8IG69	CEBP-2	bioGrid	direct
	Q18825	bar-1	G5EF96	unc-40	bioGrid	direct		P14923	bar-1		F08H9.4	bioGrid	human_orth			EBI-13666127	atfs-1	Q94165	ceh-34	IntAct	direct
	Q18825	bar-1	Q06561	unc-52	bioGrid	direct		P14923	bar-1		F09C12.2	bioGrid	human_orth			Q23272	atfs-1	Q23175	ceh-32	IntAct	direct
	Q18825	bar-1	B1V8A0	unc-57	bioGrid	direct		P14923	bar-1		F13G3.7	bioGrid	human_orth			Q23272	atfs-1	H2KY91	dac-1	IntAct	direct
	Q18825	bar-1	Q9N5D6	unc-62	bioGrid	direct		P14923	bar-1		F16A11.1	bioGrid	human_orth			Q23272	atfs-1	A0A131MCL4	die-1	IntAct	direct
	Q18825	bar-1	G5EGG0	uso-1	bioGrid	direct		P14923	bar-1		F26H9.5	bioGrid	human_orth			Q23272	atfs-1	Q19291	dmd-5	IntAct	direct
	Q18825	bar-1	G5EDN8	vab-19	bioGrid	direct		P14923	bar-1		F32D8.4	bioGrid	human_orth			Q18605	atfs-1	Q23272	atfs-1	IntAct	direct
	Q18825	bar-1	G5EEK5	vet-6	bioGrid	direct		P14923	bar-1		F32H2.6	bioGrid	human_orth			Q23272	atfs-1	Q95QD7	lin-54	IntAct	direct
	Q18825	bar-1	Q9BL60	vps-20	bioGrid	direct		P14923	bar-1		F42A6.5	bioGrid	human_orth			Q23272	atfs-1	Q22227	mig-5	IntAct	direct
	Q18825	bar-1	Q9NA26	vps-28	bioGrid	direct		P14923	bar-1		F56F11.4	bioGrid	human_orth			Q23272	atfs-1	Q21006	nhr-34	IntAct	direct
	Q18825	bar-1	Q18886	vps-32.1	bioGrid	direct		P14923	bar-1		flna-1	bioGrid	human_orth			Q23272	atfs-1	P91544	p91544_caeel	IntAct	direct
	Q18825	bar-1	Q9BL83	vps-4	bioGrid	direct		P14923	bar-1		flna-1	bioGrid	human_orth			Q23272	atfs-1	Q9GYG1	q9gyg1_caeel	IntAct	direct
	Q18825	bar-1	O18181	W09D10.1	bioGrid	direct		P14923	bar-1		gbf-1	bioGrid	human_orth			Q23272	atfs-1	Q9N352	q9n352_caeel	IntAct	direct
	Q18825	bar-1	Q20059	wdr-48	bioGrid	direct		P14923	bar-1		gcl-1	bioGrid	human_orth			Q23272	atfs-1	P48181	unc-29	IntAct	direct
	Q18825	bar-1	H2KZ22	wip-1	bioGrid	direct		P14923	bar-1		gfl-1	bioGrid	human_orth			Q23272	atfs-1	O17894	unc-39	IntAct	direct
	Q18825	bar-1	G5EEZ4	Y44F5A.1	bioGrid	direct		P14923	bar-1		gpd-1	bioGrid	human_orth			Q23272	atfs-1	Q21006	NHR-34	Mentha	direct
	Q18825	bar-1	Q9TXZ9	ykt-6	bioGrid	direct		P14923	bar-1		grk-1	bioGrid	human_orth			Q23272	atfs-1	P48181	UNC-29	Mentha	direct
	Q18825	bar-1	Q23280	ZC395.10	bioGrid	direct		P14923	bar-1		gsp-1	bioGrid	human_orth			P14923	bar-1		CDH1	bioGrid	human_orth
	Q18825	bar-1	P34604	ZK1098.4	bioGrid	direct		P14923	bar-1		hda-5	bioGrid	human_orth			P14923	bar-1		Dsc1	bioGrid	human_orth
	Q18825	bar-1	Q23525	ZK546.14	bioGrid	direct		P14923	bar-1		hip-1	bioGrid	human_orth			P14923	bar-1		DSG2	bioGrid	human_orth
	Q18825	bar-1	Q9N5V6	ztf-3	bioGrid	direct		P14923	bar-1		hlh-2	bioGrid	human_orth			P14923	bar-1		CDH3	bioGrid	human_orth
	Q18825	bar-1	G5EEM5	zyg-9	bioGrid	direct		P14923	bar-1		hmp-1	bioGrid	human_orth			P14923	bar-1		CDH5	bioGrid	human_orth
	Q27539	clpp-1	O61709	R119.3	bioGrid	direct		P14923	bar-1		hmp-1	bioGrid	human_orth			P14923	bar-1		CDH2	bioGrid	human_orth
	Q27539	clpp-1	E9RKC7	Y95B8A.8	bioGrid	direct		P14923	bar-1		hmp-1	bioGrid	human_orth			P14923	bar-1		PTPN14	bioGrid	human_orth
	Q86MI0	dve-1	Q10669	Sur-2	bioGrid	direct		P14923	bar-1		hrp-1	bioGrid	human_orth			P14923	bar-1		DSG3	bioGrid	human_orth
	Q86MI0	dve-1	G5EDU4	Eor-1	bioGrid	direct		P14923	bar-1		hsp-110	bioGrid	human_orth			P14923	bar-1		DSC2	bioGrid	human_orth
	Q86MI0	dve-1	G5EE70	Eor-2	bioGrid	direct		P14923	bar-1		hsp-110	bioGrid	human_orth			P14923	bar-1		GJB1	bioGrid	human_orth
	G5EG05	egl-20	G5EGT9	lin-18	bioGrid	direct		P14923	bar-1		hsp-4	bioGrid	human_orth			P14923	bar-1		DSC3	bioGrid	human_orth
	P11141	hsp-6	P27604	ahcy-1	bioGrid	direct		P14923	bar-1		hum-2	bioGrid	human_orth			P14923	bar-1		PECAM1	bioGrid	human_orth
	P11141	hsp-6	Q18421	C34C12.8	bioGrid	direct		P14923	bar-1		iars-2	bioGrid	human_orth			P14923	bar-1		DSG1	bioGrid	human_orth
	P11141	hsp-6	P43509	cpr-5	bioGrid	direct		P14923	bar-1		jac-1	bioGrid	human_orth			P14923	bar-1		USP1	bioGrid	human_orth
	P11141	hsp-6	Q8TA83	dnj-10	bioGrid	direct		P14923	bar-1		jac-1	bioGrid	human_orth			P14923	bar-1		INSIG2	bioGrid	human_orth
	P11141	hsp-6	P29691	eef-2	bioGrid	direct		P14923	bar-1		jac-1	bioGrid	human_orth			P14923	bar-1		DES	bioGrid	human_orth
	P11141	hsp-6	Q27527	enol-1	bioGrid	direct		P14923	bar-1		K08E3.4	bioGrid	human_orth			P14923	bar-1		CSDE1	bioGrid	human_orth
	P11141	hsp-6	P34382	far-1	bioGrid	direct		P14923	bar-1		K10H10.6	bioGrid	human_orth			P14923	bar-1		CDH10	bioGrid	human_orth
	P11141	hsp-6	P34383	far-2	bioGrid	direct		P14923	bar-1		lec-6	bioGrid	human_orth			P14923	bar-1		CUL7	bioGrid	human_orth
	P11141	hsp-6	Q23621	gdh-1	bioGrid	direct		P14923	bar-1		let-23	bioGrid	human_orth			P14923	bar-1		CCDC8	bioGrid	human_orth
	P11141	hsp-6	Q09580	gmps-1	bioGrid	direct		P14923	bar-1		let-23	bioGrid	human_orth			P14923	bar-1		RAD51AP1	bioGrid	human_orth
	P11141	hsp-6	Q9NAB4	gst-26	bioGrid	direct		P14923	bar-1		let-268	bioGrid	human_orth			P14923	bar-1		CEP128	bioGrid	human_orth
	P11141	hsp-6	P91253	gst-7	bioGrid	direct		P14923	bar-1		let-60	bioGrid	human_orth			P14923	bar-1		AXIN1	bioGrid	human_orth
	P11141	hsp-6	Q21351	gtbp-1	bioGrid	direct		P14923	bar-1		lev-11	bioGrid	human_orth			P14923	bar-1		SYNPO	bioGrid	human_orth
	P11141	hsp-6	Q05036	hsp-110	bioGrid	direct		P14923	bar-1		lim-9	bioGrid	human_orth			P14923	bar-1		LIMA1	bioGrid	human_orth
	P11141	hsp-6	D5MCN2	larp-1	bioGrid	direct		P14923	bar-1		lin-23	bioGrid	human_orth			P14923	bar-1		Flot1	bioGrid	human_orth
	P11141	hsp-6	Q11184	let-756	bioGrid	direct		P14923	bar-1		lin-45	bioGrid	human_orth			P14923	bar-1		Nhsl1	bioGrid	human_orth
	P11141	hsp-6	O44441	mai-2	bioGrid	direct		P14923	bar-1		mboa-1	bioGrid	human_orth			P14923	bar-1		Cobll1	bioGrid	human_orth
	P11141	hsp-6	O18000	pes-9	bioGrid	direct		P14923	bar-1		mcm-2	bioGrid	human_orth			P14923	bar-1		GPATCH2L	bioGrid	human_orth
	P11141	hsp-6	O17680	sams-1	bioGrid	direct		P14923	bar-1		mcm-5	bioGrid	human_orth			P14923	bar-1		CDH8	bioGrid	human_orth
	P11141	hsp-6	O02161	tin-44	bioGrid	direct		P14923	bar-1		mek-2	bioGrid	human_orth			P14923	bar-1		NPPA	bioGrid	human_orth
	P11141	hsp-6	G5ECG0	tac-1	bioGrid	direct		P14923	bar-1		mes-6	bioGrid	human_orth			P14923	bar-1		PDE4DIP	bioGrid	human_orth
	P11141	hsp-6	P50140	hsp-60	bioGrid	direct		P14923	bar-1		mks-2	bioGrid	human_orth			P14923	bar-1		OAZ3	bioGrid	human_orth
	P11141	hsp-6	Q966I7	K08D12.3	bioGrid	direct		P14923	bar-1		mlc-6	bioGrid	human_orth			P14923	bar-1		BRF2	bioGrid	human_orth
	P11141	hsp-6	Q22100	kat-1	bioGrid	direct		P14923	bar-1		mrpl-9	bioGrid	human_orth			P14923	bar-1		TRIM14	bioGrid	human_orth
	P11141	hsp-6	P21137	kin-1	bioGrid	direct		P14923	bar-1		msh-2	bioGrid	human_orth			P14923	bar-1		RNF4	bioGrid	human_orth
	P11141	hsp-6	Q95XN2	mppa-1	bioGrid	direct		P14923	bar-1		myo-5	bioGrid	human_orth			P14923	bar-1		MYC	bioGrid	human_orth
	P11141	hsp-6	P91917	ola-1	bioGrid	direct		P14923	bar-1		ndk-1	bioGrid	human_orth			P14923	bar-1		NEK2	bioGrid	human_orth
	P11141	hsp-6	Q9N585	ppw-2	bioGrid	direct		P14923	bar-1		nhr-91	bioGrid	human_orth			P14923	bar-1		KRT17	bioGrid	human_orth
	P11141	hsp-6	Q21215	rack-1	bioGrid	direct		P14923	bar-1		panl-2	bioGrid	human_orth			P14923	bar-1		METTL14	bioGrid	human_orth
	P11141	hsp-6	P49196	rps-12	bioGrid	direct		P14923	bar-1		pat-3	bioGrid	human_orth			P14923	bar-1		NFATC4	bioGrid	human_orth
	P11141	hsp-6	P49197	rps-21	bioGrid	direct		P14923	bar-1		pde-3	bioGrid	human_orth			P14923	bar-1		NFKBIE	bioGrid	human_orth
	P11141	hsp-6	Q95Y04	rps-28	bioGrid	direct		P14923	bar-1		phb-1	bioGrid	human_orth			P14923	bar-1		RIBC2	bioGrid	human_orth
	P11141	hsp-6	Q18678	sars-1	bioGrid	direct		P14923	bar-1		phb-2	bioGrid	human_orth			P14923	bar-1		YWHAE	bioGrid	human_orth
	P11141	hsp-6	Q09508	sdha-1	bioGrid	direct		P14923	bar-1		prdx-2	bioGrid	human_orth			P14923	bar-1		aagr-2	bioGrid	human_orth
	P11141	hsp-6	Q9N3T5	spg-7	bioGrid	direct		P14923	bar-1		prp-8	bioGrid	human_orth			P14923	bar-1		abce-1	bioGrid	human_orth
	P11141	hsp-6	Q22562	T19B10.2	bioGrid	direct		P14923	bar-1		ptp-3	bioGrid	human_orth			P14923	bar-1		ahcy-1	bioGrid	human_orth
	P11141	hsp-6	Q21770	wago-1	bioGrid	direct		P14923	bar-1		pyr-1	bioGrid	human_orth			P14923	bar-1		aka-1	bioGrid	human_orth
	P11141	hsp-6	Q965Q1	Y22D7AL.10	bioGrid	direct		P14923	bar-1		R06C7.6	bioGrid	human_orth			P14923	bar-1		aldo-2	bioGrid	human_orth
	P11141	hsp-6	Q65XX4	Y47G6A.15	bioGrid	direct		P14923	bar-1		R11H6.5	bioGrid	human_orth			P14923	bar-1		apr-1	bioGrid	human_orth
	P11141	hsp-6	Q9XWK2	Y54E5A.5	bioGrid	direct		P14923	bar-1		rab-5	bioGrid	human_orth			P14923	bar-1		ard-1	bioGrid	human_orth
	P11141	hsp-6	Q23642	ZK856.7	bioGrid	direct		P14923	bar-1		rab-7	bioGrid	human_orth			P14923	bar-1		bar-1	bioGrid	human_orth
	P50140	hsp-60	Q9N4M4	anc-1	bioGrid	direct		P14923	bar-1		rab-8	bioGrid	human_orth			P14923	bar-1		bir-2	bioGrid	human_orth
	P50140	hsp-60	Q95YF1	C07H6.4	bioGrid	direct		P14923	bar-1		rhi-1	bioGrid	human_orth			P14923	bar-1		bre-4	bioGrid	human_orth
	P50140	hsp-60	Q8ITY4	C50D2.5	bioGrid	direct		P14923	bar-1		rpl-1	bioGrid	human_orth			P14923	bar-1		C14C10.4	bioGrid	human_orth
	P50140	hsp-60	Q9N4U0	cyh-1	bioGrid	direct		P14923	bar-1		rpl-12	bioGrid	human_orth			P14923	bar-1		C24G6.8	bioGrid	human_orth
	P50140	hsp-60	Q20875	ddx-15	bioGrid	direct		P14923	bar-1		rpl-21	bioGrid	human_orth			P14923	bar-1		C31C9.2	bioGrid	human_orth
	P50140	hsp-60	Q18066	dim-1	bioGrid	direct		P14923	bar-1		rpl-28	bioGrid	human_orth			P14923	bar-1		C34F6.10	bioGrid	human_orth
	P50140	hsp-60	Q19853	F28B4.3	bioGrid	direct		P14923	bar-1		rps-1	bioGrid	human_orth			P14923	bar-1		C37A2.7	bioGrid	human_orth
	P50140	hsp-60	H2KZG6	acdh-1	bioGrid	direct		P14923	bar-1		rps-13	bioGrid	human_orth			P14923	bar-1		C52E12.1	bioGrid	human_orth
	P50140	hsp-60	O01530	asp-6	bioGrid	direct		P14923	bar-1		rps-19	bioGrid	human_orth			P14923	bar-1		cap-2	bioGrid	human_orth
	P50140	hsp-60	P34574	chc-1	bioGrid	direct		P14923	bar-1		rps-2	bioGrid	human_orth			P14923	bar-1		cbp-2	bioGrid	human_orth
	P50140	hsp-60	O45148	dlst-1	bioGrid	direct		P14923	bar-1		rsp-8	bioGrid	human_orth			P14923	bar-1		cbp-2	bioGrid	human_orth
	P50140	hsp-60	O44400	F37C4.5	bioGrid	direct		P14923	bar-1		ruvb-2	bioGrid	human_orth			P14923	bar-1		cdc-73	bioGrid	human_orth
	P50140	hsp-60	P27420	hsp-3	bioGrid	direct		P14923	bar-1		sdha-2	bioGrid	human_orth			P14923	bar-1		cdk-1	bioGrid	human_orth
	P50140	hsp-60	P11141	hsp-6	bioGrid	direct		P14923	bar-1		sel-10	bioGrid	human_orth			P14923	bar-1		cdk-2	bioGrid	human_orth
	P50140	hsp-60	O18694	lsm-5	bioGrid	direct		P14923	bar-1		sel-12	bioGrid	human_orth			P14923	bar-1		ced-9	bioGrid	human_orth
	P50140	hsp-60	O76840	mig-6	bioGrid	direct		P14923	bar-1		sma-1	bioGrid	human_orth			P14923	bar-1		cft-1	bioGrid	human_orth
	P50140	hsp-60	G5EBY6	phf-5	bioGrid	direct		P14923	bar-1		spe-15	bioGrid	human_orth			P14923	bar-1		chc-1	bioGrid	human_orth
	P50140	hsp-60	G5ECL3	prp-21	bioGrid	direct		P14923	bar-1		spe-5	bioGrid	human_orth			P14923	bar-1		chd-3	bioGrid	human_orth
	P50140	hsp-60	P34659	snr-5	bioGrid	direct		P14923	bar-1		sup-12	bioGrid	human_orth			P14923	bar-1		chd-3	bioGrid	human_orth
	P50140	hsp-60	G5EEQ8	sftb-1	bioGrid	direct		P14923	bar-1		T05E11.3	bioGrid	human_orth			P14923	bar-1		cku-70	bioGrid	human_orth
	P50140	hsp-60	G5ED97	tag-65	bioGrid	direct		P14923	bar-1		T13H5.1	bioGrid	human_orth			P14923	bar-1		cku-80	bioGrid	human_orth
	P50140	hsp-60	O44985	teg-4	bioGrid	direct		P14923	bar-1		T19B4.3	bioGrid	human_orth			P14923	bar-1		cmd-1	bioGrid	human_orth
	P50140	hsp-60	O16997	sftb-2	bioGrid	direct		P14923	bar-1		tag-335	bioGrid	human_orth			P14923	bar-1		cnp-2	bioGrid	human_orth
	P50140	hsp-60	Q2L6Y6	hsp-75	bioGrid	direct		P14923	bar-1		tbp-1	bioGrid	human_orth			P14923	bar-1		copd-1	bioGrid	human_orth
	P50140	hsp-60	Q20751	iff-2	bioGrid	direct		P14923	bar-1		tdp-1	bioGrid	human_orth			P14923	bar-1		coq-2	bioGrid	human_orth
	P50140	hsp-60	Q9N3S3	rnp-6	bioGrid	direct		P14923	bar-1		trip-4	bioGrid	human_orth			P14923	bar-1		cor-1	bioGrid	human_orth
	P50140	hsp-60	Q9NEW6	rsp-3	bioGrid	direct		P14923	bar-1		trk-1	bioGrid	human_orth			P14923	bar-1		cri-3	bioGrid	human_orth
	P50140	hsp-60	Q09508	sdha-1	bioGrid	direct		P14923	bar-1		trm-1	bioGrid	human_orth			P14923	bar-1		csn-5	bioGrid	human_orth
	P50140	hsp-60	Q95Y51	smr-1	bioGrid	direct		P14923	bar-1		ubxn-1	bioGrid	human_orth			P14923	bar-1		ctl-1	bioGrid	human_orth
	P50140	hsp-60	Q17348	snr-1	bioGrid	direct		P14923	bar-1		unc-94	bioGrid	human_orth			P14923	bar-1		cul-2	bioGrid	human_orth
	P50140	hsp-60	Q10013	snr-3	bioGrid	direct		P14923	bar-1		vdac-1	bioGrid	human_orth			P14923	bar-1		cul-5	bioGrid	human_orth
	P50140	hsp-60	Q18786	snr-4	bioGrid	direct		P14923	bar-1		vem-1	bioGrid	human_orth			P14923	bar-1		cyld-1	bioGrid	human_orth
	P50140	hsp-60	Q9XTU6	snr-6	bioGrid	direct		P14923	bar-1		vha-20	bioGrid	human_orth			P14923	bar-1		D2096.11	bioGrid	human_orth
	P50140	hsp-60	Q9N4G9	snr-7	bioGrid	direct		P14923	bar-1		vps-32.1	bioGrid	human_orth			P14923	bar-1		D2096.11	bioGrid	human_orth
	P50140	hsp-60	Q9N3T5	spg-7	bioGrid	direct		P14923	bar-1		vps-4	bioGrid	human_orth			P14923	bar-1		daf-18	bioGrid	human_orth
	P50140	hsp-60	Q22469	T13H5.4	bioGrid	direct		P14923	bar-1		Y110A7A.7	bioGrid	human_orth			P14923	bar-1		daf-2	bioGrid	human_orth
	P50140	hsp-60	Q93573	tct-1	bioGrid	direct		P14923	bar-1		Y67A10A.7	bioGrid	human_orth			P14923	bar-1		daf-21	bioGrid	human_orth
	P50140	hsp-60	Q9U2U0	uaf-2	bioGrid	direct		P14923	bar-1		Y75B8A.24	bioGrid	human_orth			P14923	bar-1		daf-4	bioGrid	human_orth
	Q4VNJ8	lin-65	O62079	C25F9.5	bioGrid	direct		P14923	bar-1		Y95B8A.8	bioGrid	human_orth			P14923	bar-1		dhp-1	bioGrid	human_orth
	Q7YWX7	mig-14	O44411	nog-1	bioGrid	direct		P14923	bar-1		ZC123.4	bioGrid	human_orth			P14923	bar-1		dlc-1	bioGrid	human_orth
	Q7YWX7	mig-14	Q18025	C15H9.4	bioGrid	direct		P14923	bar-1		ZC477.3	bioGrid	human_orth			P14923	bar-1		dld-1	bioGrid	human_orth
	Q10666	pop-1	Q18825	bar-1	bioGrid	direct		P14923	bar-1		ZK1240.3	bioGrid	human_orth			P14923	bar-1		ebp-1	bioGrid	human_orth
	Q10666	pop-1	Q17979	C14C11.2	bioGrid	direct		P14923	bar-1		ZK1248.19	bioGrid	human_orth			P14923	bar-1		eef-1A.2	bioGrid	human_orth
	Q10666	pop-1	P34545	cbp-1	bioGrid	direct		P14923	bar-1		ZK1307.9	bioGrid	human_orth			P14923	bar-1		eef-2	bioGrid	human_orth
	Q10666	pop-1	Q19503	ceh-40	bioGrid	direct		P14923	bar-1		ZK177.8	bioGrid	human_orth			P14923	bar-1		egl-13	bioGrid	human_orth
	Q10666	pop-1	Q9N4L2	ceh-45	bioGrid	direct		P14923	bar-1		Dsg1a	bioGrid	human_orth			P14923	bar-1		erm-1	bioGrid	human_orth
	Q10666	pop-1	Q9TYL9	copb-1	bioGrid	direct		P14923	bar-1		NARS	bioGrid	human_orth			P14923	bar-1		exo-3	bioGrid	human_orth
	Q10666	pop-1	O17761	ech-8	bioGrid	direct		P14923	bar-1		C21orf59	bioGrid	human_orth			P14923	bar-1		F08H9.4	bioGrid	human_orth
	Q10666	pop-1	P17486	egl-5	bioGrid	direct		P14923	bar-1		ZUFSP	bioGrid	human_orth			P14923	bar-1		F09C12.2	bioGrid	human_orth
	Q10666	pop-1	P17139	emb-9	bioGrid	direct		P14923	bar-1		KIAA1429	bioGrid	human_orth			P14923	bar-1		F13G3.7	bioGrid	human_orth
	Q10666	pop-1	O17670	eya-1	bioGrid	direct		P14923	bar-1		HIV2gp4	bioGrid	human_orth			P14923	bar-1		F16A11.1	bioGrid	human_orth
	Q10666	pop-1	O62203	F32B4.4	bioGrid	direct		P14923	bar-1		HIV2gp3	bioGrid	human_orth			P14923	bar-1		F26H9.5	bioGrid	human_orth
	Q10666	pop-1	Q20422	F45D3.2	bioGrid	direct		P14923	bar-1		TARS	bioGrid	human_orth			P14923	bar-1		F32D8.4	bioGrid	human_orth
	Q10666	pop-1	G5EBJ7	fbp-1	bioGrid	direct		P35222	bar-1		CALCOCO1	bioGrid	human_orth			P14923	bar-1		F32H2.6	bioGrid	human_orth
	Q10666	pop-1	Q95ZK7	gld-3	bioGrid	direct		P35222	bar-1		MATR3	bioGrid	human_orth			P14923	bar-1		F42A6.5	bioGrid	human_orth
	Q10666	pop-1	O17695	hda-1	bioGrid	direct		P35222	bar-1		FAS	bioGrid	human_orth			P14923	bar-1		F56F11.4	bioGrid	human_orth
	Q10666	pop-1	Q22866	lev-11	bioGrid	direct		P35222	bar-1		SLAMF7	bioGrid	human_orth			P14923	bar-1		flna-1	bioGrid	human_orth
	Q10666	pop-1	Q19345	nhr-25	bioGrid	direct		P35222	bar-1		VEZT	bioGrid	human_orth			P14923	bar-1		flna-1	bioGrid	human_orth
	Q10666	pop-1	Q21021	npp-9	bioGrid	direct		P35222	bar-1		CDH1	bioGrid	human_orth			P14923	bar-1		gbf-1	bioGrid	human_orth
	Q10666	pop-1	P41932	par-5	bioGrid	direct		P35222	bar-1		CDH10	bioGrid	human_orth			P14923	bar-1		gcl-1	bioGrid	human_orth
	Q10666	pop-1	O17670	eya-1	bioGrid	direct		P35222	bar-1		THRAP3	bioGrid	human_orth			P14923	bar-1		gfl-1	bioGrid	human_orth
	Q10666	pop-1	Q9XVA3	F08G2.5	bioGrid	direct		P35222	bar-1		USP13	bioGrid	human_orth			P14923	bar-1		gpd-1	bioGrid	human_orth
	Q10666	pop-1	G5EDT1	lin-35	bioGrid	direct		P35222	bar-1		CDH3	bioGrid	human_orth			P14923	bar-1		grk-1	bioGrid	human_orth
	Q10666	pop-1	Q09990	lin-23	bioGrid	direct		P35222	bar-1		RNF4	bioGrid	human_orth			P14923	bar-1		gsp-1	bioGrid	human_orth
	Q10666	pop-1	Q9XVI2	sys-1	bioGrid	direct		P35222	bar-1		BCL3	bioGrid	human_orth			P14923	bar-1		hda-5	bioGrid	human_orth
	Q10666	pop-1	P17486	egl-5	bioGrid	direct		P35222	bar-1		MAPK6	bioGrid	human_orth			P14923	bar-1		hip-1	bioGrid	human_orth
	Q10666	pop-1	Q10666	pop-1	bioGrid	direct		P35222	bar-1		RAD18	bioGrid	human_orth			P14923	bar-1		hlh-2	bioGrid	human_orth
	Q10666	pop-1	Q9U9Y8	lit-1	bioGrid	direct		P35222	bar-1		PTGS2	bioGrid	human_orth			P14923	bar-1		hmp-1	bioGrid	human_orth
	Q10666	pop-1	P34545	cbp-1	bioGrid	direct		P35222	bar-1		KIF22	bioGrid	human_orth			P14923	bar-1		hmp-1	bioGrid	human_orth
	Q10666	pop-1	O62090	pry-1	bioGrid	direct		P35222	bar-1		CDH7	bioGrid	human_orth			P14923	bar-1		hmp-1	bioGrid	human_orth
	Q10666	pop-1	O17695	hda-1	bioGrid	direct		P35222	bar-1		GEMIN5	bioGrid	human_orth			P14923	bar-1		hrp-1	bioGrid	human_orth
	Q10666	pop-1	Q11184	let-756	bioGrid	direct		P35222	bar-1		HNRNPC	bioGrid	human_orth			P14923	bar-1		hsp-110	bioGrid	human_orth
	Q10666	pop-1	P29355	sem-5	bioGrid	direct		P35222	bar-1		CBY1	bioGrid	human_orth			P14923	bar-1		hsp-110	bioGrid	human_orth
	Q10666	pop-1	Q18825	bar-1	bioGrid	direct		P35222	bar-1		CEP128	bioGrid	human_orth			P14923	bar-1		hsp-4	bioGrid	human_orth
	Q10666	pop-1	P13508	glp-1	bioGrid	direct		P35222	bar-1		TBL1X	bioGrid	human_orth			P14923	bar-1		hum-2	bioGrid	human_orth
	Q10666	pop-1	Q10656	egl-15	bioGrid	direct		P35222	bar-1		EMD	bioGrid	human_orth			P14923	bar-1		iars-2	bioGrid	human_orth
	Q10666	pop-1	Q9N5D3	sos-1	bioGrid	direct		P35222	bar-1		AXIN1	bioGrid	human_orth			P14923	bar-1		jac-1	bioGrid	human_orth
	Q10666	pop-1	Q968Y9	daf-2	bioGrid	direct		P35222	bar-1		USP10	bioGrid	human_orth			P14923	bar-1		jac-1	bioGrid	human_orth
	Q10666	pop-1	P22981	let-60	bioGrid	direct		P35222	bar-1		PTN	bioGrid	human_orth			P14923	bar-1		jac-1	bioGrid	human_orth
	Q10666	pop-1	Q10459	mom-2	bioGrid	direct		P35222	bar-1		TAX1BP1	bioGrid	human_orth			P14923	bar-1		K08E3.4	bioGrid	human_orth
	Q10666	pop-1	Q9NAH2	tbx-34	bioGrid	direct		P35222	bar-1		DKK1	bioGrid	human_orth			P14923	bar-1		K10H10.6	bioGrid	human_orth
	Q10666	pop-1	Q9NAE4	zip-7	bioGrid	direct		P35222	bar-1		UBE2S	bioGrid	human_orth			P14923	bar-1		lec-6	bioGrid	human_orth
	Q10666	pop-1	O18214	mab-3	bioGrid	direct		P35222	bar-1		TRIM37	bioGrid	human_orth			P14923	bar-1		let-23	bioGrid	human_orth
	Q10666	pop-1	Q9U1R1	ceh-51	bioGrid	direct		P35222	bar-1		NFKB1	bioGrid	human_orth			P14923	bar-1		let-23	bioGrid	human_orth
	Q10666	pop-1	Q94398	ceh-8	bioGrid	direct		P35222	bar-1		PARP11	bioGrid	human_orth			P14923	bar-1		let-268	bioGrid	human_orth
	Q10666	pop-1	G5EF29	pqn-21	bioGrid	direct		P35222	bar-1		FANCE	bioGrid	human_orth			P14923	bar-1		let-60	bioGrid	human_orth
	Q10666	pop-1	O61708	pqn-59	bioGrid	direct		P35222	bar-1		CDH9	bioGrid	human_orth			P14923	bar-1		lev-11	bioGrid	human_orth
	Q10666	pop-1	Q21648	R02F2.5	bioGrid	direct		P35222	bar-1		CDH6	bioGrid	human_orth			P14923	bar-1		lim-9	bioGrid	human_orth
	Q10666	pop-1	G5EBX2	R07B7.2	bioGrid	direct		P35222	bar-1		BCL6	bioGrid	human_orth			P14923	bar-1		lin-23	bioGrid	human_orth
	Q10666	pop-1	Q94178	ref-2	bioGrid	direct		P35222	bar-1		UBE3A	bioGrid	human_orth			P14923	bar-1		lin-45	bioGrid	human_orth
	Q10666	pop-1	Q9XVI2	sys-1	bioGrid	direct		P35222	bar-1		ARMC8	bioGrid	human_orth			P14923	bar-1		mboa-1	bioGrid	human_orth
	Q10666	pop-1	Q20257	tbx-11	bioGrid	direct		P35222	bar-1		CACYBP	bioGrid	human_orth			P14923	bar-1		mcm-2	bioGrid	human_orth
	Q10666	pop-1	Q9XVD5	tbx-38	bioGrid	direct		P35222	bar-1		NEK2	bioGrid	human_orth			P14923	bar-1		mcm-5	bioGrid	human_orth
	Q10666	pop-1	Q18694	unc-130	bioGrid	direct		P35222	bar-1		KMT2A	bioGrid	human_orth			P14923	bar-1		mek-2	bioGrid	human_orth
	Q10666	pop-1	O02482	unc-37	bioGrid	direct		P35222	bar-1		CITED1	bioGrid	human_orth			P14923	bar-1		mes-6	bioGrid	human_orth
	Q10666	pop-1	G5EE68	unc-75	bioGrid	direct		P35222	bar-1		RALY	bioGrid	human_orth			P14923	bar-1		mks-2	bioGrid	human_orth
	Q10666	pop-1	G5EGG0	uso-1	bioGrid	direct		P35222	bar-1		PRDX5	bioGrid	human_orth			P14923	bar-1		mlc-6	bioGrid	human_orth
	Q10666	pop-1	Q10953	wrm-1	bioGrid	direct		P35222	bar-1		APOE	bioGrid	human_orth			P14923	bar-1		mrpl-9	bioGrid	human_orth
	Q10666	pop-1	Q23079	ZC317.7	bioGrid	direct		P35222	bar-1		TRIM28	bioGrid	human_orth			P14923	bar-1		msh-2	bioGrid	human_orth
	P91302	ubl-5	Q19416	DYLT-1	bioGrid	direct		P35222	bar-1		COX7B	bioGrid	human_orth			P14923	bar-1		myo-5	bioGrid	human_orth
	P91302	ubl-5	Q95XR1	TBCA-1	bioGrid	direct		P35222	bar-1		USP29	bioGrid	human_orth			P14923	bar-1		ndk-1	bioGrid	human_orth
	Q23272	atfs-1	G5ED85	g5ed85_caeel	IntAct	direct		P35222	bar-1		MEN1	bioGrid	human_orth			P14923	bar-1		nhr-91	bioGrid	human_orth
	EBI-13666127	atfs-1	Q94165	ceh-34	IntAct	direct		P35222	bar-1		RNF138	bioGrid	human_orth			P14923	bar-1		panl-2	bioGrid	human_orth
	Q23272	atfs-1	Q23175	ceh-32	IntAct	direct		P35222	bar-1		DSC3	bioGrid	human_orth			P14923	bar-1		pat-3	bioGrid	human_orth
	Q23272	atfs-1	H2KY91	dac-1	IntAct	direct		P35222	bar-1		NT5E	bioGrid	human_orth			P14923	bar-1		pde-3	bioGrid	human_orth
	Q23272	atfs-1	A0A131MCL4	die-1	IntAct	direct		P35222	bar-1		CAPRIN1	bioGrid	human_orth			P14923	bar-1		phb-1	bioGrid	human_orth
	Q23272	atfs-1	Q19291	dmd-5	IntAct	direct		P35222	bar-1		Nhsl1	bioGrid	human_orth			P14923	bar-1		phb-2	bioGrid	human_orth
	Q18605	atfs-1	Q23272	atfs-1	IntAct	direct		P35222	bar-1		USP37	bioGrid	human_orth			P14923	bar-1		prdx-2	bioGrid	human_orth
	Q18825	bar-1	H2FLG9	grsp-2	IntAct	direct		P35222	bar-1		MYC	bioGrid	human_orth			P14923	bar-1		prp-8	bioGrid	human_orth
	Q18825	bar-1	O76672	H34I24.2	IntAct	direct		P35222	bar-1		UACA	bioGrid	human_orth			P14923	bar-1		ptp-3	bioGrid	human_orth
	Q18825	bar-1	Q21127	meg-2	IntAct	direct		P35222	bar-1		PML	bioGrid	human_orth			P14923	bar-1		pyr-1	bioGrid	human_orth
	Q18825	bar-1	Q10666	pop-1	IntAct	direct		P35222	bar-1		CDH11	bioGrid	human_orth			P14923	bar-1		R06C7.6	bioGrid	human_orth
	Q18825	bar-1	G2HK03	pqn-87	IntAct	direct		P35222	bar-1		MED9	bioGrid	human_orth			P14923	bar-1		R11H6.5	bioGrid	human_orth
	Q18825	bar-1	B1V8A0	unc-57	IntAct	direct		P35222	bar-1		PLEKHA6	bioGrid	human_orth			P14923	bar-1		rab-5	bioGrid	human_orth
	Q18825	bar-1	O18181	W09D10.1	IntAct	direct		P35222	bar-1		USP53	bioGrid	human_orth			P14923	bar-1		rab-7	bioGrid	human_orth
	Q86MI0	dve-1	G5EBR5	somi-1	IntAct	direct		P35222	bar-1		CDH18	bioGrid	human_orth			P14923	bar-1		rab-8	bioGrid	human_orth
	Q9GYI1	jmjd-1.2	P08898	his-2	IntAct	direct		P35222	bar-1		UHRF2	bioGrid	human_orth			P14923	bar-1		rhi-1	bioGrid	human_orth
	Q23272	atfs-1	Q95QD7	lin-54	IntAct	direct		P35222	bar-1		MKI67	bioGrid	human_orth			P14923	bar-1		rpl-1	bioGrid	human_orth
	Q4VNJ8	lin-65	G5ECK4	g5eck4_caeel	IntAct	direct		P35222	bar-1		PTPRJ	bioGrid	human_orth			P14923	bar-1		rpl-12	bioGrid	human_orth
	Q7YWX7	mig-14	Q18788	mans-2	IntAct	direct		P35222	bar-1		CDH8	bioGrid	human_orth			P14923	bar-1		rpl-21	bioGrid	human_orth
	Q23272	atfs-1	Q22227	mig-5	IntAct	direct		P35222	bar-1		PTPN14	bioGrid	human_orth			P14923	bar-1		rpl-28	bioGrid	human_orth
	Q23272	atfs-1	Q21006	nhr-34	IntAct	direct		P35222	bar-1		USP43	bioGrid	human_orth			P14923	bar-1		rps-1	bioGrid	human_orth
	Q23272	atfs-1	P91544	p91544_caeel	IntAct	direct		P35222	bar-1		FANCC	bioGrid	human_orth			P14923	bar-1		rps-13	bioGrid	human_orth
	Q23272	atfs-1	Q9GYG1	q9gyg1_caeel	IntAct	direct		P35222	bar-1		LAD1	bioGrid	human_orth			P14923	bar-1		rps-19	bioGrid	human_orth
	Q23272	atfs-1	Q9N352	q9n352_caeel	IntAct	direct		P35222	bar-1		ZNF326	bioGrid	human_orth			P14923	bar-1		rps-2	bioGrid	human_orth
	Q23272	atfs-1	P48181	unc-29	IntAct	direct		P35222	bar-1		USP49	bioGrid	human_orth			P14923	bar-1		rsp-8	bioGrid	human_orth
	Q23272	atfs-1	O17894	unc-39	IntAct	direct		P35222	bar-1		OTUD1	bioGrid	human_orth			P14923	bar-1		ruvb-2	bioGrid	human_orth
	Q23272	atfs-1	Q21006	NHR-34	Mentha	direct		P35222	bar-1		RET	bioGrid	human_orth			P14923	bar-1		sdha-2	bioGrid	human_orth
	Q23272	atfs-1	P48181	UNC-29	Mentha	direct		P35222	bar-1		API5	bioGrid	human_orth			P14923	bar-1		sel-10	bioGrid	human_orth
	Q18825	bar-1	B1V8A0	B1V8A0	Mentha	direct		P35222	bar-1		Mis12	bioGrid	human_orth			P14923	bar-1		sel-12	bioGrid	human_orth
	Q18825	bar-1	Q5FC73	Q5FC73	Mentha	direct		P35222	bar-1		AXIN2	bioGrid	human_orth			P14923	bar-1		sma-1	bioGrid	human_orth
	Q18825	bar-1	Q9N4L2	CEH-45	Mentha	direct		P35222	bar-1		AR	bioGrid	human_orth			P14923	bar-1		spe-15	bioGrid	human_orth
	Q18825	bar-1	Q9U1W1	TFG-1	Mentha	direct		P35222	bar-1		CCDC8	bioGrid	human_orth			P14923	bar-1		spe-5	bioGrid	human_orth
	Q18825	bar-1	Q23158	ATN-1	Mentha	direct		P35222	bar-1		CDH2	bioGrid	human_orth			P14923	bar-1		sup-12	bioGrid	human_orth
	Q18825	bar-1	Q3LRZ3	AXL-1	Mentha	direct		P35222	bar-1		TADA3	bioGrid	human_orth			P14923	bar-1		T05E11.3	bioGrid	human_orth
	Q18825	bar-1	Q21127	MEG-2	Mentha	direct		P35222	bar-1		MARCKSL1	bioGrid	human_orth			P14923	bar-1		T13H5.1	bioGrid	human_orth
	Q18825	bar-1	Q21227	APR-1	Mentha	direct		P35222	bar-1		COX8A	bioGrid	human_orth			P14923	bar-1		T19B4.3	bioGrid	human_orth
	Q18825	bar-1	Q9N5V6	ZTF-3	Mentha	direct		P35222	bar-1		ZBTB33	bioGrid	human_orth			P14923	bar-1		tag-335	bioGrid	human_orth
	Q18825	bar-1	P55216	CTH-2	Mentha	direct		P35222	bar-1		TBL1XR1	bioGrid	human_orth			P14923	bar-1		tbp-1	bioGrid	human_orth
	Q18825	bar-1	O16850	DAF-16	Mentha	direct		P35222	bar-1		CDH5	bioGrid	human_orth			P14923	bar-1		tdp-1	bioGrid	human_orth
	Q18825	bar-1	G2HK03	G2HK03	Mentha	direct		P35222	bar-1		YOD1	bioGrid	human_orth			P14923	bar-1		trip-4	bioGrid	human_orth
	Q18825	bar-1	H2FLG9	H2FLG9	Mentha	direct		P35222	bar-1		NPM1	bioGrid	human_orth			P14923	bar-1		trk-1	bioGrid	human_orth
	Q18825	bar-1	Q09990	LIN-23	Mentha	direct		P35222	bar-1		FANCF	bioGrid	human_orth			P14923	bar-1		trm-1	bioGrid	human_orth
	Q18825	bar-1	G5ECD7	MEL-11	Mentha	direct		P35222	bar-1		DAZAP2	bioGrid	human_orth			P14923	bar-1		ubxn-1	bioGrid	human_orth
	Q18825	bar-1	O18181	O18181	Mentha	direct		P35222	bar-1		AMER1	bioGrid	human_orth			P14923	bar-1		unc-94	bioGrid	human_orth
	Q18825	bar-1	O76672	O76672	Mentha	direct		P35222	bar-1		USP18	bioGrid	human_orth			P14923	bar-1		vdac-1	bioGrid	human_orth
	Q18825	bar-1	P34604	P34604	Mentha	direct		P35222	bar-1		BRCC3	bioGrid	human_orth			P14923	bar-1		vem-1	bioGrid	human_orth
	Q18825	bar-1	Q10666	POP-1	Mentha	direct		P35222	bar-1		RNF220	bioGrid	human_orth			P14923	bar-1		vha-20	bioGrid	human_orth
	Q18825	bar-1	O62090	PRY-1	Mentha	direct		P35222	bar-1		PTMA	bioGrid	human_orth			P14923	bar-1		vps-32.1	bioGrid	human_orth
	Q18825	bar-1	P0CG71	UBQ-1	Mentha	direct		P35222	bar-1		FANCA	bioGrid	human_orth			P14923	bar-1		vps-4	bioGrid	human_orth
	Q18825	bar-1	G5EGG0	USO-1	Mentha	direct		P35222	bar-1		FHIT	bioGrid	human_orth			P14923	bar-1		Y110A7A.7	bioGrid	human_orth
	Q18825	bar-1	G5EEK5	VET-6	Mentha	direct		P35222	bar-1		PTPN1	bioGrid	human_orth			P14923	bar-1		Y67A10A.7	bioGrid	human_orth
	Q86MI0	dve-1	Q9U2R6	NHR-91	Mentha	direct		P35222	bar-1		AJAP1	bioGrid	human_orth			P14923	bar-1		Y75B8A.24	bioGrid	human_orth
	Q86MI0	dve-1	Q86MI0	DVE-1	Mentha	direct		P35222	bar-1		TRIM33	bioGrid	human_orth			P14923	bar-1		Y95B8A.8	bioGrid	human_orth
	G5EG05	egl-20	P27639	INF-1	Mentha	direct		P35222	bar-1		COPS8	bioGrid	human_orth			P14923	bar-1		ZC123.4	bioGrid	human_orth
	G5EG05	egl-20	G5EGK5	CAM-1	Mentha	direct		P35222	bar-1		SMURF1	bioGrid	human_orth			P14923	bar-1		ZC477.3	bioGrid	human_orth
	Q9XVY4	gcn-2	Q9XW88	PHP-3	Mentha	direct		P35222	bar-1		FANCG	bioGrid	human_orth			P14923	bar-1		ZK1240.3	bioGrid	human_orth
	P11141	hsp-6	Q11184	LET-756	Mentha	direct		P35222	bar-1		SAPCD1	bioGrid	human_orth			P14923	bar-1		ZK1248.19	bioGrid	human_orth
	P11141	hsp-6	G5ECG0	TAC-1	Mentha	direct		P35222	bar-1		POU5F1	bioGrid	human_orth			P14923	bar-1		ZK1307.9	bioGrid	human_orth
	P50140	hsp-60	P34529	DCR-1	Mentha	direct		P35222	bar-1		PRKDC	bioGrid	human_orth			P14923	bar-1		ZK177.8	bioGrid	human_orth
	P50140	hsp-60	Q09506	txbp-3	Mentha	direct		P35222	bar-1		PECAM1	bioGrid	human_orth			P14923	bar-1		Dsg1a	bioGrid	human_orth
	P50140	hsp-60	P91182	MAGU-3	Mentha	direct		P35222	bar-1		OTUD7B	bioGrid	human_orth			P14923	bar-1		NARS	bioGrid	human_orth
	Q9GYI0	jmjd-1.2	P08898	HIS-63	Mentha	direct		P35222	bar-1		LINC01194	bioGrid	human_orth			P14923	bar-1		C21orf59	bioGrid	human_orth
	Q4VNJ8	lin-65	O76572	EPHX-1	Mentha	direct		P35222	bar-1		PROP1	bioGrid	human_orth			P14923	bar-1		ZUFSP	bioGrid	human_orth
	Q4VNJ8	lin-65	P03949	ABL-1	Mentha	direct		P35222	bar-1		YWHAE	bioGrid	human_orth			P14923	bar-1		KIAA1429	bioGrid	human_orth
	Q95XN0	lin-65	G5EGG0	USO-1	Mentha	direct		P35222	bar-1		GLIS2	bioGrid	human_orth			P14923	bar-1		HIV2gp4	bioGrid	human_orth
	Q4VNJ8	lin-65	G5EE56	SRC-1	Mentha	direct		P35222	bar-1		HNF1B	bioGrid	human_orth			P14923	bar-1		HIV2gp3	bioGrid	human_orth
	Q4VNJ8	lin-65	G5ED33	EPS-8	Mentha	direct		P35222	bar-1		TADA2A	bioGrid	human_orth			P14923	bar-1		TARS	bioGrid	human_orth
	Q4VNJ8	lin-65	Q19253	TOCA-1	Mentha	direct		P35222	bar-1		HRAS	bioGrid	human_orth			P35222	bar-1		CALCOCO1	bioGrid	human_orth
	Q9U2T9	lin-65	Q4VNJ8	LIN-65	Mentha	direct		P35222	bar-1		HERC2	bioGrid	human_orth			P35222	bar-1		MATR3	bioGrid	human_orth
	Q8I103	lin-65	Q4VNJ8	LIN-65	Mentha	direct		P35222	bar-1		OTUB2	bioGrid	human_orth			P35222	bar-1		FAS	bioGrid	human_orth
	Q4VNJ8	lin-65	Q09989	SDPN-1	Mentha	direct		P35222	bar-1		TJP1	bioGrid	human_orth			P35222	bar-1		SLAMF7	bioGrid	human_orth
	Q8IU04	lin-65	P03949	ABL-1	Mentha	direct		P35222	bar-1		RPS17	bioGrid	human_orth			P35222	bar-1		VEZT	bioGrid	human_orth
	Q4VNJ8	lin-65	G5EC72	ALP-1	Mentha	direct		P35222	bar-1		RPL7A	bioGrid	human_orth			P35222	bar-1		CDH1	bioGrid	human_orth
	Q4VNJ8	lin-65	G5ECK4	G5ECK4	Mentha	direct		P35222	bar-1		aagr-2	bioGrid	human_orth			P35222	bar-1		CDH10	bioGrid	human_orth
	Q95XN0	lin-65	Q9XU77	Q9XU77	Mentha	direct		P35222	bar-1		aap-1	bioGrid	human_orth			P35222	bar-1		THRAP3	bioGrid	human_orth
	Q7YWX7	mig-14	O44411	NOG-1	Mentha	direct		P35222	bar-1		aass-1	bioGrid	human_orth			P35222	bar-1		USP13	bioGrid	human_orth
	Q7YWX7	mig-14	Q18788	Q18788	Mentha	direct		P35222	bar-1		abce-1	bioGrid	human_orth			P35222	bar-1		CDH3	bioGrid	human_orth
	Q7YWX7	mig-14	P91857	RAB-5	Mentha	direct		P35222	bar-1		abcf-2	bioGrid	human_orth			P35222	bar-1		RNF4	bioGrid	human_orth
	Q7YWX7	mig-14	Q18025	C15H9.4	Mentha	direct		P35222	bar-1		abcf-3	bioGrid	human_orth			P35222	bar-1		BCL3	bioGrid	human_orth
	Q7YWX7	mig-14	Q22866	LEV-11	Mentha	direct		P35222	bar-1		abl-1	bioGrid	human_orth			P35222	bar-1		MAPK6	bioGrid	human_orth
	O45007	pop-1	O17670	EYA-1	Mentha	direct		P35222	bar-1		acly-2	bioGrid	human_orth			P35222	bar-1		RAD18	bioGrid	human_orth
	O45007	pop-1	Q9XVA3	Q9XVA3	Mentha	direct		P35222	bar-1		aco-2	bioGrid	human_orth			P35222	bar-1		PTGS2	bioGrid	human_orth
	Q10666	pop-1	P34545	CBP-1	Mentha	direct		P35222	bar-1		act-3	bioGrid	human_orth			P35222	bar-1		KIF22	bioGrid	human_orth
	Q10666	pop-1	O17761	ECH-8	Mentha	direct		P35222	bar-1		act-3	bioGrid	human_orth			P35222	bar-1		CDH7	bioGrid	human_orth
	Q10666	pop-1	P17486	EGL-5	Mentha	direct		P35222	bar-1		adsl-1	bioGrid	human_orth			P35222	bar-1		GEMIN5	bioGrid	human_orth
	Q10666	pop-1	P17139	EMB-9	Mentha	direct		P35222	bar-1		aha-1	bioGrid	human_orth			P35222	bar-1		HNRNPC	bioGrid	human_orth
	Q10666	pop-1	O17670	EYA-1	Mentha	direct		P35222	bar-1		ahcy-1	bioGrid	human_orth			P35222	bar-1		CBY1	bioGrid	human_orth
	Q10666	pop-1	G5EBJ7	FBP-1	Mentha	direct		P35222	bar-1		ahr-1	bioGrid	human_orth			P35222	bar-1		CEP128	bioGrid	human_orth
	Q10666	pop-1	G5EBX2	G5EBX2	Mentha	direct		P35222	bar-1		air-2	bioGrid	human_orth			P35222	bar-1		TBL1X	bioGrid	human_orth
	Q10666	pop-1	H2KYH4	HAM-2	Mentha	direct		P35222	bar-1		aka-1	bioGrid	human_orth			P35222	bar-1		EMD	bioGrid	human_orth
	Q10666	pop-1	O17695	HDA-1	Mentha	direct		P35222	bar-1		alp-1	bioGrid	human_orth			P35222	bar-1		AXIN1	bioGrid	human_orth
	Q10666	pop-1	P34684	LIN-39	Mentha	direct		P35222	bar-1		alx-1	bioGrid	human_orth			P35222	bar-1		USP10	bioGrid	human_orth
	Q10666	pop-1	O18214	MAB-3	Mentha	direct		P35222	bar-1		aly-3	bioGrid	human_orth			P35222	bar-1		PTN	bioGrid	human_orth
	Q10666	pop-1	Q09565	NHR-20	Mentha	direct		P35222	bar-1		ama-1	bioGrid	human_orth			P35222	bar-1		TAX1BP1	bioGrid	human_orth
	Q10666	pop-1	O44719	O44719	Mentha	direct		P35222	bar-1		ant-1.4	bioGrid	human_orth			P35222	bar-1		DKK1	bioGrid	human_orth
	Q10666	pop-1	O62203	O62203	Mentha	direct		P35222	bar-1		apl-1	bioGrid	human_orth			P35222	bar-1		UBE2S	bioGrid	human_orth
	Q10666	pop-1	P41932	PAR-5	Mentha	direct		P35222	bar-1		apr-1	bioGrid	human_orth			P35222	bar-1		TRIM37	bioGrid	human_orth
	Q10666	pop-1	Q93616	LSY-22	Mentha	direct		P35222	bar-1		apr-1	bioGrid	human_orth			P35222	bar-1		NFKB1	bioGrid	human_orth
	Q10666	pop-1	Q95ZK7	GLD-3	Mentha	direct		P35222	bar-1		aptf-1	bioGrid	human_orth			P35222	bar-1		PARP11	bioGrid	human_orth
	Q10666	pop-1	Q17979	Q17979	Mentha	direct		P35222	bar-1		arf-1.2	bioGrid	human_orth			P35222	bar-1		FANCE	bioGrid	human_orth
	Q10666	pop-1	Q23079	Q23079	Mentha	direct		P35222	bar-1		ash-2	bioGrid	human_orth			P35222	bar-1		CDH9	bioGrid	human_orth
	Q10666	pop-1	Q86G90	NPP-9	Mentha	direct		P35222	bar-1		atad-3	bioGrid	human_orth			P35222	bar-1		CDH6	bioGrid	human_orth
	Q10666	pop-1	Q95QR2	NHR-46	Mentha	direct		P35222	bar-1		atf-6	bioGrid	human_orth			P35222	bar-1		BCL6	bioGrid	human_orth
	Q10666	pop-1	Q9TXN8	DMD-8	Mentha	direct		P35222	bar-1		atf-7	bioGrid	human_orth			P35222	bar-1		UBE3A	bioGrid	human_orth
	Q10666	pop-1	Q9TYL9	Q9TYL9	Mentha	direct		P35222	bar-1		athp-1	bioGrid	human_orth			P35222	bar-1		ARMC8	bioGrid	human_orth
	Q10666	pop-1	Q9U9Y8	LIT-1	Mentha	direct		P35222	bar-1		atic-1	bioGrid	human_orth			P35222	bar-1		CACYBP	bioGrid	human_orth
	Q10666	pop-1	Q9XVA3	Q9XVA3	Mentha	direct		P35222	bar-1		atn-1	bioGrid	human_orth			P35222	bar-1		NEK2	bioGrid	human_orth
	Q10666	pop-1	Q9XVI2	SYS-1	Mentha	direct		P35222	bar-1		ATP5A1	bioGrid	human_orth			P35222	bar-1		KMT2A	bioGrid	human_orth
	Q10666	pop-1	Q18056	HLH-27	Mentha	direct		P35222	bar-1		ATP5B	bioGrid	human_orth			P35222	bar-1		CITED1	bioGrid	human_orth
	Q10666	pop-1	Q19418	ZTF-2	Mentha	direct		P35222	bar-1		ATP5C1	bioGrid	human_orth			P35222	bar-1		RALY	bioGrid	human_orth
	Q10666	pop-1	Q22289	TBX-9	Mentha	direct		P35222	bar-1		atx-2	bioGrid	human_orth			P35222	bar-1		PRDX5	bioGrid	human_orth
	Q10666	pop-1	Q22866	LEV-11	Mentha	direct		P35222	bar-1		atx-2	bioGrid	human_orth			P35222	bar-1		APOE	bioGrid	human_orth
	Q10666	pop-1	Q7JNM3	REF-2	Mentha	direct		P35222	bar-1		atx-2	bioGrid	human_orth			P35222	bar-1		TRIM28	bioGrid	human_orth
	Q10666	pop-1	Q18825	BAR-1	Mentha	direct		P35222	bar-1		B0281.8	bioGrid	human_orth			P35222	bar-1		COX7B	bioGrid	human_orth
	Q10666	pop-1	Q20422	Q20422	Mentha	direct		P35222	bar-1		B0495.8	bioGrid	human_orth			P35222	bar-1		USP29	bioGrid	human_orth
	Q10666	pop-1	Q19503	CEH-40	Mentha	direct		P35222	bar-1		baz-2	bioGrid	human_orth			P35222	bar-1		MEN1	bioGrid	human_orth
	Q10666	pop-1	Q10953	WRM-1	Mentha	direct		P35222	bar-1		baz-2	bioGrid	human_orth			P35222	bar-1		RNF138	bioGrid	human_orth
	Q10666	pop-1	Q94398	CEH-8	Mentha	direct		P35222	bar-1		bcc-1	bioGrid	human_orth			P35222	bar-1		DSC3	bioGrid	human_orth
	Q10666	pop-1	Q20257	TBX-11	Mentha	direct		P35222	bar-1		ben-1	bioGrid	human_orth			P35222	bar-1		NT5E	bioGrid	human_orth
	Q10666	pop-1	Q21648	Q21648	Mentha	direct		P35222	bar-1		bro-1	bioGrid	human_orth			P35222	bar-1		CAPRIN1	bioGrid	human_orth
	Q10666	pop-1	Q9U1R1	CEH-51	Mentha	direct		P35222	bar-1		C02B10.5	bioGrid	human_orth			P35222	bar-1		Nhsl1	bioGrid	human_orth
	Q10666	pop-1	Q9NAH2	TBX-34	Mentha	direct		P35222	bar-1		C05D11.1	bioGrid	human_orth			P35222	bar-1		USP37	bioGrid	human_orth
	Q10666	pop-1	Q18694	UNC-130	Mentha	direct		P35222	bar-1		C09E7.5	bioGrid	human_orth			P35222	bar-1		MYC	bioGrid	human_orth
	Q10666	pop-1	Q10666	POP-1	Mentha	direct		P35222	bar-1		C14C10.1	bioGrid	human_orth			P35222	bar-1		UACA	bioGrid	human_orth
	Q10666	pop-1	Q9XVD5	TBX-38	Mentha	direct		P35222	bar-1		C14C10.4	bioGrid	human_orth			P35222	bar-1		PML	bioGrid	human_orth
	Q10666	pop-1	Q9N4L2	CEH-45	Mentha	direct		P35222	bar-1		C21orf59	bioGrid	human_orth			P35222	bar-1		CDH11	bioGrid	human_orth
	Q10666	pop-1	Q9N5D6	UNC-62	Mentha	direct		P35222	bar-1		C27B7.7	bioGrid	human_orth			P35222	bar-1		MED9	bioGrid	human_orth
	Q10666	pop-1	Q9NA56	TBX-39	Mentha	direct		P35222	bar-1		C27B7.7	bioGrid	human_orth			P35222	bar-1		PLEKHA6	bioGrid	human_orth
	Q10666	pop-1	Q9NAE4	ZIP-7	Mentha	direct		P35222	bar-1		C31C9.2	bioGrid	human_orth			P35222	bar-1		USP53	bioGrid	human_orth
	Q10666	pop-1	H2KZ82	PQN-21	Mentha	direct		P35222	bar-1		C34D10.2	bioGrid	human_orth			P35222	bar-1		CDH18	bioGrid	human_orth
	Q10666	pop-1	O61708	PQN-59	Mentha	direct		P35222	bar-1		C34F6.10	bioGrid	human_orth			P35222	bar-1		UHRF2	bioGrid	human_orth
	Q10666	pop-1	P34708	TRA-1	Mentha	direct		P35222	bar-1		C37A2.7	bioGrid	human_orth			P35222	bar-1		MKI67	bioGrid	human_orth
	Q10666	pop-1	O02482	UNC-37	Mentha	direct		P35222	bar-1		C45G9.7	bioGrid	human_orth			P35222	bar-1		PTPRJ	bioGrid	human_orth
	Q10666	pop-1	G5EE68	UNC-75	Mentha	direct		P35222	bar-1		cah-1	bioGrid	human_orth			P35222	bar-1		CDH8	bioGrid	human_orth
	Q10666	pop-1	G5EGG0	USO-1	Mentha	direct		P35222	bar-1		cand-1	bioGrid	human_orth			P35222	bar-1		PTPN14	bioGrid	human_orth
	P91302	ubl-5	Q86G90	NPP-9	Mentha	direct		P35222	bar-1		cap-1	bioGrid	human_orth			P35222	bar-1		USP43	bioGrid	human_orth
	P91302	ubl-5	Q20660	HSP-17	Mentha	direct		P35222	bar-1		cap-1	bioGrid	human_orth			P35222	bar-1		FANCC	bioGrid	human_orth
								P35222	bar-1		cash-1	bioGrid	human_orth			P35222	bar-1		LAD1	bioGrid	human_orth
								P35222	bar-1		cav-2	bioGrid	human_orth			P35222	bar-1		ZNF326	bioGrid	human_orth
								P35222	bar-1		cbp-2	bioGrid	human_orth			P35222	bar-1		USP49	bioGrid	human_orth
								P35222	bar-1		cbp-2	bioGrid	human_orth			P35222	bar-1		OTUD1	bioGrid	human_orth
								P35222	bar-1		cct-1	bioGrid	human_orth			P35222	bar-1		RET	bioGrid	human_orth
								P35222	bar-1		cct-2	bioGrid	human_orth			P35222	bar-1		API5	bioGrid	human_orth
								P35222	bar-1		cct-4	bioGrid	human_orth			P35222	bar-1		Mis12	bioGrid	human_orth
								P35222	bar-1		cdc-37	bioGrid	human_orth			P35222	bar-1		AXIN2	bioGrid	human_orth
								P35222	bar-1		cdc-73	bioGrid	human_orth			P35222	bar-1		AR	bioGrid	human_orth
								P35222	bar-1		cdh3-b	bioGrid	human_orth			P35222	bar-1		CCDC8	bioGrid	human_orth
								P35222	bar-1		cdk-2	bioGrid	human_orth			P35222	bar-1		CDH2	bioGrid	human_orth
								P35222	bar-1		cdk-4	bioGrid	human_orth			P35222	bar-1		TADA3	bioGrid	human_orth
								P35222	bar-1		cdk-9	bioGrid	human_orth			P35222	bar-1		MARCKSL1	bioGrid	human_orth
								P35222	bar-1		cdka-1	bioGrid	human_orth			P35222	bar-1		COX8A	bioGrid	human_orth
								P35222	bar-1		cebp-1	bioGrid	human_orth			P35222	bar-1		ZBTB33	bioGrid	human_orth
								P35222	bar-1		ced-9	bioGrid	human_orth			P35222	bar-1		TBL1XR1	bioGrid	human_orth
								P35222	bar-1		ceh-44	bioGrid	human_orth			P35222	bar-1		CDH5	bioGrid	human_orth
								P35222	bar-1		cey-2	bioGrid	human_orth			P35222	bar-1		YOD1	bioGrid	human_orth
								P35222	bar-1		cfim-2	bioGrid	human_orth			P35222	bar-1		NPM1	bioGrid	human_orth
								P35222	bar-1		cft-1	bioGrid	human_orth			P35222	bar-1		FANCF	bioGrid	human_orth
								P35222	bar-1		chd-7	bioGrid	human_orth			P35222	bar-1		DAZAP2	bioGrid	human_orth
								P35222	bar-1		chn-1	bioGrid	human_orth			P35222	bar-1		AMER1	bioGrid	human_orth
								P35222	bar-1		cin-4	bioGrid	human_orth			P35222	bar-1		USP18	bioGrid	human_orth
								P35222	bar-1		cku-70	bioGrid	human_orth			P35222	bar-1		BRCC3	bioGrid	human_orth
								P35222	bar-1		cku-80	bioGrid	human_orth			P35222	bar-1		RNF220	bioGrid	human_orth
								P35222	bar-1		clic-1	bioGrid	human_orth			P35222	bar-1		PTMA	bioGrid	human_orth
								P35222	bar-1		cmd-1	bioGrid	human_orth			P35222	bar-1		FANCA	bioGrid	human_orth
								P35222	bar-1		cnp-2	bioGrid	human_orth			P35222	bar-1		FHIT	bioGrid	human_orth
								P35222	bar-1		copa-1	bioGrid	human_orth			P35222	bar-1		PTPN1	bioGrid	human_orth
								P35222	bar-1		cope-1	bioGrid	human_orth			P35222	bar-1		AJAP1	bioGrid	human_orth
								P35222	bar-1		cor-1	bioGrid	human_orth			P35222	bar-1		TRIM33	bioGrid	human_orth
								P35222	bar-1		cox-18	bioGrid	human_orth			P35222	bar-1		COPS8	bioGrid	human_orth
								P35222	bar-1		cox-4	bioGrid	human_orth			P35222	bar-1		SMURF1	bioGrid	human_orth
								P35222	bar-1		COX2	bioGrid	human_orth			P35222	bar-1		FANCG	bioGrid	human_orth
								P35222	bar-1		csn-5	bioGrid	human_orth			P35222	bar-1		SAPCD1	bioGrid	human_orth
								P35222	bar-1		csp-3	bioGrid	human_orth			P35222	bar-1		POU5F1	bioGrid	human_orth
								P35222	bar-1		ctbp-1	bioGrid	human_orth			P35222	bar-1		PRKDC	bioGrid	human_orth
								P35222	bar-1		ctbp-1	bioGrid	human_orth			P35222	bar-1		PECAM1	bioGrid	human_orth
								P35222	bar-1		cul-3	bioGrid	human_orth			P35222	bar-1		OTUD7B	bioGrid	human_orth
								P35222	bar-1		cul-4	bioGrid	human_orth			P35222	bar-1		LINC01194	bioGrid	human_orth
								P35222	bar-1		cul-6	bioGrid	human_orth			P35222	bar-1		PROP1	bioGrid	human_orth
								P35222	bar-1		cyb-1	bioGrid	human_orth			P35222	bar-1		YWHAE	bioGrid	human_orth
								P35222	bar-1		cyb-1	bioGrid	human_orth			P35222	bar-1		GLIS2	bioGrid	human_orth
								P35222	bar-1		cye-1	bioGrid	human_orth			P35222	bar-1		HNF1B	bioGrid	human_orth
								P35222	bar-1		cyld-1	bioGrid	human_orth			P35222	bar-1		TADA2A	bioGrid	human_orth
								P35222	bar-1		cyn-9	bioGrid	human_orth			P35222	bar-1		HRAS	bioGrid	human_orth
								P35222	bar-1		D2013.6	bioGrid	human_orth			P35222	bar-1		HERC2	bioGrid	human_orth
								P35222	bar-1		dad-1	bioGrid	human_orth			P35222	bar-1		OTUB2	bioGrid	human_orth
								P35222	bar-1		daf-14	bioGrid	human_orth			P35222	bar-1		TJP1	bioGrid	human_orth
								P35222	bar-1		daf-14	bioGrid	human_orth			P35222	bar-1		RPS17	bioGrid	human_orth
								P35222	bar-1		daf-16	bioGrid	human_orth			P35222	bar-1		RPL7A	bioGrid	human_orth
								P35222	bar-1		daf-16	bioGrid	human_orth			P35222	bar-1		aagr-2	bioGrid	human_orth
								P35222	bar-1		daf-18	bioGrid	human_orth			P35222	bar-1		aap-1	bioGrid	human_orth
								P35222	bar-1		daf-2	bioGrid	human_orth			P35222	bar-1		aass-1	bioGrid	human_orth
								P35222	bar-1		daf-4	bioGrid	human_orth			P35222	bar-1		abce-1	bioGrid	human_orth
								P35222	bar-1		daf-4	bioGrid	human_orth			P35222	bar-1		abcf-2	bioGrid	human_orth
								P35222	bar-1		DARS	bioGrid	human_orth			P35222	bar-1		abcf-3	bioGrid	human_orth
								P35222	bar-1		ddb-1	bioGrid	human_orth			P35222	bar-1		abl-1	bioGrid	human_orth
								P35222	bar-1		ddx-17	bioGrid	human_orth			P35222	bar-1		acly-2	bioGrid	human_orth
								P35222	bar-1		deb-1	bioGrid	human_orth			P35222	bar-1		aco-2	bioGrid	human_orth
								P35222	bar-1		dhc-1	bioGrid	human_orth			P35222	bar-1		act-3	bioGrid	human_orth
								P35222	bar-1		dhhc-14	bioGrid	human_orth			P35222	bar-1		act-3	bioGrid	human_orth
								P35222	bar-1		djr-1.1	bioGrid	human_orth			P35222	bar-1		adsl-1	bioGrid	human_orth
								P35222	bar-1		dnj-9	bioGrid	human_orth			P35222	bar-1		aha-1	bioGrid	human_orth
								P35222	bar-1		dpy-23	bioGrid	human_orth			P35222	bar-1		ahcy-1	bioGrid	human_orth
								P35222	bar-1		dsh-2	bioGrid	human_orth			P35222	bar-1		ahr-1	bioGrid	human_orth
								P35222	bar-1		dsh-2	bioGrid	human_orth			P35222	bar-1		air-2	bioGrid	human_orth
								P35222	bar-1		dsh-2	bioGrid	human_orth			P35222	bar-1		aka-1	bioGrid	human_orth
								P35222	bar-1		dve-1	bioGrid	human_orth			P35222	bar-1		alp-1	bioGrid	human_orth
								P35222	bar-1		E01B7.1	bioGrid	human_orth			P35222	bar-1		alx-1	bioGrid	human_orth
								P35222	bar-1		E01B7.1	bioGrid	human_orth			P35222	bar-1		aly-3	bioGrid	human_orth
								P35222	bar-1		E02H1.1	bioGrid	human_orth			P35222	bar-1		ama-1	bioGrid	human_orth
								P35222	bar-1		eat-6	bioGrid	human_orth			P35222	bar-1		ant-1.4	bioGrid	human_orth
								P35222	bar-1		ebp-1	bioGrid	human_orth			P35222	bar-1		apl-1	bioGrid	human_orth
								P35222	bar-1		ech-5	bioGrid	human_orth			P35222	bar-1		apr-1	bioGrid	human_orth
								P35222	bar-1		eef-1B.1	bioGrid	human_orth			P35222	bar-1		apr-1	bioGrid	human_orth
								P35222	bar-1		eef-2	bioGrid	human_orth			P35222	bar-1		aptf-1	bioGrid	human_orth
								P35222	bar-1		eel-1	bioGrid	human_orth			P35222	bar-1		arf-1.2	bioGrid	human_orth
								P35222	bar-1		eftu-2	bioGrid	human_orth			P35222	bar-1		ash-2	bioGrid	human_orth
								P35222	bar-1		egl-13	bioGrid	human_orth			P35222	bar-1		atad-3	bioGrid	human_orth
								P35222	bar-1		egl-13	bioGrid	human_orth			P35222	bar-1		atf-6	bioGrid	human_orth
								P35222	bar-1		egl-13	bioGrid	human_orth			P35222	bar-1		atf-7	bioGrid	human_orth
								P35222	bar-1		egl-13	bioGrid	human_orth			P35222	bar-1		athp-1	bioGrid	human_orth
								P35222	bar-1		egl-15	bioGrid	human_orth			P35222	bar-1		atic-1	bioGrid	human_orth
								P35222	bar-1		egl-9	bioGrid	human_orth			P35222	bar-1		atn-1	bioGrid	human_orth
								P35222	bar-1		egrh-3	bioGrid	human_orth			P35222	bar-1		ATP5A1	bioGrid	human_orth
								P35222	bar-1		eif-2alpha	bioGrid	human_orth			P35222	bar-1		ATP5B	bioGrid	human_orth
								P35222	bar-1		eif-3.J	bioGrid	human_orth			P35222	bar-1		ATP5C1	bioGrid	human_orth
								P35222	bar-1		eif-6	bioGrid	human_orth			P35222	bar-1		atx-2	bioGrid	human_orth
								P35222	bar-1		emr-1	bioGrid	human_orth			P35222	bar-1		atx-2	bioGrid	human_orth
								P35222	bar-1		enpl-1	bioGrid	human_orth			P35222	bar-1		atx-2	bioGrid	human_orth
								P35222	bar-1		epg-7	bioGrid	human_orth			P35222	bar-1		B0281.8	bioGrid	human_orth
								P35222	bar-1		ERBB2IP	bioGrid	human_orth			P35222	bar-1		B0495.8	bioGrid	human_orth
								P35222	bar-1		erl-1	bioGrid	human_orth			P35222	bar-1		baz-2	bioGrid	human_orth
								P35222	bar-1		erm-1	bioGrid	human_orth			P35222	bar-1		baz-2	bioGrid	human_orth
								P35222	bar-1		erm-1	bioGrid	human_orth			P35222	bar-1		bcc-1	bioGrid	human_orth
								P35222	bar-1		exc-7	bioGrid	human_orth			P35222	bar-1		ben-1	bioGrid	human_orth
								P35222	bar-1		F07C6.4	bioGrid	human_orth			P35222	bar-1		bro-1	bioGrid	human_orth
								P35222	bar-1		F08H9.4	bioGrid	human_orth			P35222	bar-1		C02B10.5	bioGrid	human_orth
								P35222	bar-1		F08H9.4	bioGrid	human_orth			P35222	bar-1		C05D11.1	bioGrid	human_orth
								P35222	bar-1		F10G8.8	bioGrid	human_orth			P35222	bar-1		C09E7.5	bioGrid	human_orth
								P35222	bar-1		F11E6.8	bioGrid	human_orth			P35222	bar-1		C14C10.1	bioGrid	human_orth
								P35222	bar-1		F13B9.1	bioGrid	human_orth			P35222	bar-1		C14C10.4	bioGrid	human_orth
								P35222	bar-1		F21G4.6	bioGrid	human_orth			P35222	bar-1		C21orf59	bioGrid	human_orth
								P35222	bar-1		F22B3.4	bioGrid	human_orth			P35222	bar-1		C27B7.7	bioGrid	human_orth
								P35222	bar-1		F26F4.5	bioGrid	human_orth			P35222	bar-1		C27B7.7	bioGrid	human_orth
								P35222	bar-1		F26F4.5	bioGrid	human_orth			P35222	bar-1		C31C9.2	bioGrid	human_orth
								P35222	bar-1		F27C1.6	bioGrid	human_orth			P35222	bar-1		C34D10.2	bioGrid	human_orth
								P35222	bar-1		F32B4.5	bioGrid	human_orth			P35222	bar-1		C34F6.10	bioGrid	human_orth
								P35222	bar-1		F33D11.10	bioGrid	human_orth			P35222	bar-1		C37A2.7	bioGrid	human_orth
								P35222	bar-1		F35B3.7	bioGrid	human_orth			P35222	bar-1		C45G9.7	bioGrid	human_orth
								P35222	bar-1		F36A2.13	bioGrid	human_orth			P35222	bar-1		cah-1	bioGrid	human_orth
								P35222	bar-1		F39B2.5	bioGrid	human_orth			P35222	bar-1		cand-1	bioGrid	human_orth
								P35222	bar-1		F42A6.5	bioGrid	human_orth			P35222	bar-1		cap-1	bioGrid	human_orth
								P35222	bar-1		F52C6.12	bioGrid	human_orth			P35222	bar-1		cap-1	bioGrid	human_orth
								P35222	bar-1		F53A10.2	bioGrid	human_orth			P35222	bar-1		cash-1	bioGrid	human_orth
								P35222	bar-1		F53A10.2	bioGrid	human_orth			P35222	bar-1		cav-2	bioGrid	human_orth
								P35222	bar-1		F56D2.5	bioGrid	human_orth			P35222	bar-1		cbp-2	bioGrid	human_orth
								P35222	bar-1		F56F11.4	bioGrid	human_orth			P35222	bar-1		cbp-2	bioGrid	human_orth
								P35222	bar-1		F58B3.6	bioGrid	human_orth			P35222	bar-1		cct-1	bioGrid	human_orth
								P35222	bar-1		F58E10.3	bioGrid	human_orth			P35222	bar-1		cct-2	bioGrid	human_orth
								P35222	bar-1		F59C12.3	bioGrid	human_orth			P35222	bar-1		cct-4	bioGrid	human_orth
								P35222	bar-1		fars-1	bioGrid	human_orth			P35222	bar-1		cdc-37	bioGrid	human_orth
								P35222	bar-1		fbn-1	bioGrid	human_orth			P35222	bar-1		cdc-73	bioGrid	human_orth
								P35222	bar-1		fkb-5	bioGrid	human_orth			P35222	bar-1		cdh3-b	bioGrid	human_orth
								P35222	bar-1		fkh-8	bioGrid	human_orth			P35222	bar-1		cdk-2	bioGrid	human_orth
								P35222	bar-1		flap-1	bioGrid	human_orth			P35222	bar-1		cdk-4	bioGrid	human_orth
								P35222	bar-1		flap-1	bioGrid	human_orth			P35222	bar-1		cdk-9	bioGrid	human_orth
								P35222	bar-1		fli-1	bioGrid	human_orth			P35222	bar-1		cdka-1	bioGrid	human_orth
								P35222	bar-1		frk-1	bioGrid	human_orth			P35222	bar-1		cebp-1	bioGrid	human_orth
								P35222	bar-1		frm-5	bioGrid	human_orth			P35222	bar-1		ced-9	bioGrid	human_orth
								P35222	bar-1		fsn-1	bioGrid	human_orth			P35222	bar-1		ceh-44	bioGrid	human_orth
								P35222	bar-1		ftt-2	bioGrid	human_orth			P35222	bar-1		cey-2	bioGrid	human_orth
								P35222	bar-1		ftt-2	bioGrid	human_orth			P35222	bar-1		cfim-2	bioGrid	human_orth
								P35222	bar-1		ftt-2	bioGrid	human_orth			P35222	bar-1		cft-1	bioGrid	human_orth
								P35222	bar-1		fubl-1	bioGrid	human_orth			P35222	bar-1		chd-7	bioGrid	human_orth
								P35222	bar-1		fust-1	bioGrid	human_orth			P35222	bar-1		chn-1	bioGrid	human_orth
								P35222	bar-1		fust-1	bioGrid	human_orth			P35222	bar-1		cin-4	bioGrid	human_orth
								P35222	bar-1		GBAS	bioGrid	human_orth			P35222	bar-1		cku-70	bioGrid	human_orth
								P35222	bar-1		gbf-1	bioGrid	human_orth			P35222	bar-1		cku-80	bioGrid	human_orth
								P35222	bar-1		gbf-1	bioGrid	human_orth			P35222	bar-1		clic-1	bioGrid	human_orth
								P35222	bar-1		gex-2	bioGrid	human_orth			P35222	bar-1		cmd-1	bioGrid	human_orth
								P35222	bar-1		GNB2L1	bioGrid	human_orth			P35222	bar-1		cnp-2	bioGrid	human_orth
								P35222	bar-1		gpd-1	bioGrid	human_orth			P35222	bar-1		copa-1	bioGrid	human_orth
								P35222	bar-1		gpn-1	bioGrid	human_orth			P35222	bar-1		cope-1	bioGrid	human_orth
								P35222	bar-1		gsk-3	bioGrid	human_orth			P35222	bar-1		cor-1	bioGrid	human_orth
								P35222	bar-1		gsk-3	bioGrid	human_orth			P35222	bar-1		cox-18	bioGrid	human_orth
								P35222	bar-1		gsnl-1	bioGrid	human_orth			P35222	bar-1		cox-4	bioGrid	human_orth
								P35222	bar-1		gsp-1	bioGrid	human_orth			P35222	bar-1		COX2	bioGrid	human_orth
								P35222	bar-1		gtbp-1	bioGrid	human_orth			P35222	bar-1		csn-5	bioGrid	human_orth
								P35222	bar-1		H34C03.2	bioGrid	human_orth			P35222	bar-1		csp-3	bioGrid	human_orth
								P35222	bar-1		H34C03.2	bioGrid	human_orth			P35222	bar-1		ctbp-1	bioGrid	human_orth
								P35222	bar-1		H34C03.2	bioGrid	human_orth			P35222	bar-1		ctbp-1	bioGrid	human_orth
								P35222	bar-1		H34C03.2	bioGrid	human_orth			P35222	bar-1		cul-3	bioGrid	human_orth
								P35222	bar-1		hcp-1	bioGrid	human_orth			P35222	bar-1		cul-4	bioGrid	human_orth
								P35222	bar-1		hda-4	bioGrid	human_orth			P35222	bar-1		cul-6	bioGrid	human_orth
								P35222	bar-1		hda-4	bioGrid	human_orth			P35222	bar-1		cyb-1	bioGrid	human_orth
								P35222	bar-1		hda-4	bioGrid	human_orth			P35222	bar-1		cyb-1	bioGrid	human_orth
								P35222	bar-1		hda-5	bioGrid	human_orth			P35222	bar-1		cye-1	bioGrid	human_orth
								P35222	bar-1		hda-6	bioGrid	human_orth			P35222	bar-1		cyld-1	bioGrid	human_orth
								P35222	bar-1		hecd-1	bioGrid	human_orth			P35222	bar-1		cyn-9	bioGrid	human_orth
								P35222	bar-1		hel-1	bioGrid	human_orth			P35222	bar-1		D2013.6	bioGrid	human_orth
								P35222	bar-1		herc-1	bioGrid	human_orth			P35222	bar-1		dad-1	bioGrid	human_orth
								P35222	bar-1		hif-1	bioGrid	human_orth			P35222	bar-1		daf-14	bioGrid	human_orth
								P35222	bar-1		hif-1	bioGrid	human_orth			P35222	bar-1		daf-14	bioGrid	human_orth
								P35222	bar-1		hint-1	bioGrid	human_orth			P35222	bar-1		daf-16	bioGrid	human_orth
								P35222	bar-1		HIST1H1C	bioGrid	human_orth			P35222	bar-1		daf-16	bioGrid	human_orth
								P35222	bar-1		HIST1H3A	bioGrid	human_orth			P35222	bar-1		daf-18	bioGrid	human_orth
								P35222	bar-1		HIST1H4A	bioGrid	human_orth			P35222	bar-1		daf-2	bioGrid	human_orth
								P35222	bar-1		hlh-2	bioGrid	human_orth			P35222	bar-1		daf-4	bioGrid	human_orth
								P35222	bar-1		hlh-2	bioGrid	human_orth			P35222	bar-1		daf-4	bioGrid	human_orth
								P35222	bar-1		hmbx-1	bioGrid	human_orth			P35222	bar-1		DARS	bioGrid	human_orth
								P35222	bar-1		hmg-1.2	bioGrid	human_orth			P35222	bar-1		ddb-1	bioGrid	human_orth
								P35222	bar-1		hmg-1.2	bioGrid	human_orth			P35222	bar-1		ddx-17	bioGrid	human_orth
								P35222	bar-1		hmg-5	bioGrid	human_orth			P35222	bar-1		deb-1	bioGrid	human_orth
								P35222	bar-1		hmp-1	bioGrid	human_orth			P35222	bar-1		dhc-1	bioGrid	human_orth
								P35222	bar-1		hmp-1	bioGrid	human_orth			P35222	bar-1		dhhc-14	bioGrid	human_orth
								P35222	bar-1		hmp-1	bioGrid	human_orth			P35222	bar-1		djr-1.1	bioGrid	human_orth
								P35222	bar-1		hmp-2	bioGrid	human_orth			P35222	bar-1		dnj-9	bioGrid	human_orth
								P35222	bar-1		hpl-1	bioGrid	human_orth			P35222	bar-1		dpy-23	bioGrid	human_orth
								P35222	bar-1		hpl-1	bioGrid	human_orth			P35222	bar-1		dsh-2	bioGrid	human_orth
								P35222	bar-1		hrp-1	bioGrid	human_orth			P35222	bar-1		dsh-2	bioGrid	human_orth
								P35222	bar-1		hrp-1	bioGrid	human_orth			P35222	bar-1		dsh-2	bioGrid	human_orth
								P35222	bar-1		hrp-2	bioGrid	human_orth			P35222	bar-1		dve-1	bioGrid	human_orth
								P35222	bar-1		hrpk-1	bioGrid	human_orth			P35222	bar-1		E01B7.1	bioGrid	human_orth
								P35222	bar-1		hsp-1	bioGrid	human_orth			P35222	bar-1		E01B7.1	bioGrid	human_orth
								P35222	bar-1		hsp-1	bioGrid	human_orth			P35222	bar-1		E02H1.1	bioGrid	human_orth
								P35222	bar-1		hsp-110	bioGrid	human_orth			P35222	bar-1		eat-6	bioGrid	human_orth
								P35222	bar-1		hsp-110	bioGrid	human_orth			P35222	bar-1		ebp-1	bioGrid	human_orth
								P35222	bar-1		hsp-4	bioGrid	human_orth			P35222	bar-1		ech-5	bioGrid	human_orth
								P35222	bar-1		hsp-6	bioGrid	human_orth			P35222	bar-1		eef-1B.1	bioGrid	human_orth
								P35222	bar-1		hsp-60	bioGrid	human_orth			P35222	bar-1		eef-2	bioGrid	human_orth
								P35222	bar-1		hum-1	bioGrid	human_orth			P35222	bar-1		eel-1	bioGrid	human_orth
								P35222	bar-1		hum-1	bioGrid	human_orth			P35222	bar-1		eftu-2	bioGrid	human_orth
								P35222	bar-1		hum-2	bioGrid	human_orth			P35222	bar-1		egl-13	bioGrid	human_orth
								P35222	bar-1		hum-2	bioGrid	human_orth			P35222	bar-1		egl-13	bioGrid	human_orth
								P35222	bar-1		icd-1	bioGrid	human_orth			P35222	bar-1		egl-13	bioGrid	human_orth
								P35222	bar-1		idhb-1	bioGrid	human_orth			P35222	bar-1		egl-13	bioGrid	human_orth
								P35222	bar-1		ifa-1	bioGrid	human_orth			P35222	bar-1		egl-15	bioGrid	human_orth
								P35222	bar-1		ikke-1	bioGrid	human_orth			P35222	bar-1		egl-9	bioGrid	human_orth
								P35222	bar-1		ikke-1	bioGrid	human_orth			P35222	bar-1		egrh-3	bioGrid	human_orth
								P35222	bar-1		immt-1	bioGrid	human_orth			P35222	bar-1		eif-2alpha	bioGrid	human_orth
								P35222	bar-1		imph-1	bioGrid	human_orth			P35222	bar-1		eif-3.J	bioGrid	human_orth
								P35222	bar-1		isw-1	bioGrid	human_orth			P35222	bar-1		eif-6	bioGrid	human_orth
								P35222	bar-1		jac-1	bioGrid	human_orth			P35222	bar-1		emr-1	bioGrid	human_orth
								P35222	bar-1		jac-1	bioGrid	human_orth			P35222	bar-1		enpl-1	bioGrid	human_orth
								P35222	bar-1		jac-1	bioGrid	human_orth			P35222	bar-1		epg-7	bioGrid	human_orth
								P35222	bar-1		jac-1	bioGrid	human_orth			P35222	bar-1		ERBB2IP	bioGrid	human_orth
								P35222	bar-1		jac-1	bioGrid	human_orth			P35222	bar-1		erl-1	bioGrid	human_orth
								P35222	bar-1		jnk-1	bioGrid	human_orth			P35222	bar-1		erm-1	bioGrid	human_orth
								P35222	bar-1		jnk-1	bioGrid	human_orth			P35222	bar-1		erm-1	bioGrid	human_orth
								P35222	bar-1		josd-1	bioGrid	human_orth			P35222	bar-1		exc-7	bioGrid	human_orth
								P35222	bar-1		josd-1	bioGrid	human_orth			P35222	bar-1		F07C6.4	bioGrid	human_orth
								P35222	bar-1		K02F3.2	bioGrid	human_orth			P35222	bar-1		F08H9.4	bioGrid	human_orth
								P35222	bar-1		K04C2.2	bioGrid	human_orth			P35222	bar-1		F08H9.4	bioGrid	human_orth
								P35222	bar-1		K04D7.4	bioGrid	human_orth			P35222	bar-1		F10G8.8	bioGrid	human_orth
								P35222	bar-1		K07C5.3	bioGrid	human_orth			P35222	bar-1		F11E6.8	bioGrid	human_orth
								P35222	bar-1		K07E3.4	bioGrid	human_orth			P35222	bar-1		F13B9.1	bioGrid	human_orth
								P35222	bar-1		K07H8.10	bioGrid	human_orth			P35222	bar-1		F21G4.6	bioGrid	human_orth
								P35222	bar-1		K07H8.9	bioGrid	human_orth			P35222	bar-1		F22B3.4	bioGrid	human_orth
								P35222	bar-1		K08C9.7	bioGrid	human_orth			P35222	bar-1		F26F4.5	bioGrid	human_orth
								P35222	bar-1		K08C9.7	bioGrid	human_orth			P35222	bar-1		F26F4.5	bioGrid	human_orth
								P35222	bar-1		K11H3.3	bioGrid	human_orth			P35222	bar-1		F27C1.6	bioGrid	human_orth
								P35222	bar-1		KIAA1429	bioGrid	human_orth			P35222	bar-1		F32B4.5	bioGrid	human_orth
								P35222	bar-1		kin-19	bioGrid	human_orth			P35222	bar-1		F33D11.10	bioGrid	human_orth
								P35222	bar-1		klc-2	bioGrid	human_orth			P35222	bar-1		F35B3.7	bioGrid	human_orth
								P35222	bar-1		klf-2	bioGrid	human_orth			P35222	bar-1		F36A2.13	bioGrid	human_orth
								P35222	bar-1		klp-20	bioGrid	human_orth			P35222	bar-1		F39B2.5	bioGrid	human_orth
								P35222	bar-1		lact-9	bioGrid	human_orth			P35222	bar-1		F42A6.5	bioGrid	human_orth
								P35222	bar-1		laf-1	bioGrid	human_orth			P35222	bar-1		F52C6.12	bioGrid	human_orth
								P35222	bar-1		LARS	bioGrid	human_orth			P35222	bar-1		F53A10.2	bioGrid	human_orth
								P35222	bar-1		ldh-1	bioGrid	human_orth			P35222	bar-1		F53A10.2	bioGrid	human_orth
								P35222	bar-1		lec-6	bioGrid	human_orth			P35222	bar-1		F56D2.5	bioGrid	human_orth
								P35222	bar-1		lec-6	bioGrid	human_orth			P35222	bar-1		F56F11.4	bioGrid	human_orth
								P35222	bar-1		leo-1	bioGrid	human_orth			P35222	bar-1		F58B3.6	bioGrid	human_orth
								P35222	bar-1		let-23	bioGrid	human_orth			P35222	bar-1		F58E10.3	bioGrid	human_orth
								P35222	bar-1		let-23	bioGrid	human_orth			P35222	bar-1		F59C12.3	bioGrid	human_orth
								P35222	bar-1		let-418	bioGrid	human_orth			P35222	bar-1		fars-1	bioGrid	human_orth
								P35222	bar-1		let-60	bioGrid	human_orth			P35222	bar-1		fbn-1	bioGrid	human_orth
								P35222	bar-1		lev-11	bioGrid	human_orth			P35222	bar-1		fkb-5	bioGrid	human_orth
								P35222	bar-1		lev-11	bioGrid	human_orth			P35222	bar-1		fkh-8	bioGrid	human_orth
								P35222	bar-1		lgg-2	bioGrid	human_orth			P35222	bar-1		flap-1	bioGrid	human_orth
								P35222	bar-1		lim-8	bioGrid	human_orth			P35222	bar-1		flap-1	bioGrid	human_orth
								P35222	bar-1		lim-8	bioGrid	human_orth			P35222	bar-1		fli-1	bioGrid	human_orth
								P35222	bar-1		lim-9	bioGrid	human_orth			P35222	bar-1		frk-1	bioGrid	human_orth
								P35222	bar-1		lin-18	bioGrid	human_orth			P35222	bar-1		frm-5	bioGrid	human_orth
								P35222	bar-1		lin-23	bioGrid	human_orth			P35222	bar-1		fsn-1	bioGrid	human_orth
								P35222	bar-1		lin-23	bioGrid	human_orth			P35222	bar-1		ftt-2	bioGrid	human_orth
								P35222	bar-1		lin-31	bioGrid	human_orth			P35222	bar-1		ftt-2	bioGrid	human_orth
								P35222	bar-1		lit-1	bioGrid	human_orth			P35222	bar-1		ftt-2	bioGrid	human_orth
								P35222	bar-1		lmn-1	bioGrid	human_orth			P35222	bar-1		fubl-1	bioGrid	human_orth
								P35222	bar-1		lmp-2	bioGrid	human_orth			P35222	bar-1		fust-1	bioGrid	human_orth
								P35222	bar-1		lpd-5	bioGrid	human_orth			P35222	bar-1		fust-1	bioGrid	human_orth
								P35222	bar-1		lrp-1	bioGrid	human_orth			P35222	bar-1		GBAS	bioGrid	human_orth
								P35222	bar-1		M04D5.1	bioGrid	human_orth			P35222	bar-1		gbf-1	bioGrid	human_orth
								P35222	bar-1		M04D5.1	bioGrid	human_orth			P35222	bar-1		gbf-1	bioGrid	human_orth
								P35222	bar-1		M142.5	bioGrid	human_orth			P35222	bar-1		gex-2	bioGrid	human_orth
								P35222	bar-1		mab-9	bioGrid	human_orth			P35222	bar-1		GNB2L1	bioGrid	human_orth
								P35222	bar-1		mag-1	bioGrid	human_orth			P35222	bar-1		gpd-1	bioGrid	human_orth
								P35222	bar-1		magi-1	bioGrid	human_orth			P35222	bar-1		gpn-1	bioGrid	human_orth
								P35222	bar-1		magi-1	bioGrid	human_orth			P35222	bar-1		gsk-3	bioGrid	human_orth
								P35222	bar-1		magi-1	bioGrid	human_orth			P35222	bar-1		gsk-3	bioGrid	human_orth
								P35222	bar-1		magu-4	bioGrid	human_orth			P35222	bar-1		gsnl-1	bioGrid	human_orth
								P35222	bar-1		mat-1	bioGrid	human_orth			P35222	bar-1		gsp-1	bioGrid	human_orth
								P35222	bar-1		math-33	bioGrid	human_orth			P35222	bar-1		gtbp-1	bioGrid	human_orth
								P35222	bar-1		mcm-2	bioGrid	human_orth			P35222	bar-1		H34C03.2	bioGrid	human_orth
								P35222	bar-1		mcm-5	bioGrid	human_orth			P35222	bar-1		H34C03.2	bioGrid	human_orth
								P35222	bar-1		mcm-7	bioGrid	human_orth			P35222	bar-1		H34C03.2	bioGrid	human_orth
								P35222	bar-1		mec-12	bioGrid	human_orth			P35222	bar-1		H34C03.2	bioGrid	human_orth
								P35222	bar-1		mel-11	bioGrid	human_orth			P35222	bar-1		hcp-1	bioGrid	human_orth
								P35222	bar-1		mel-11	bioGrid	human_orth			P35222	bar-1		hda-4	bioGrid	human_orth
								P35222	bar-1		mel-32	bioGrid	human_orth			P35222	bar-1		hda-4	bioGrid	human_orth
								P35222	bar-1		men-1	bioGrid	human_orth			P35222	bar-1		hda-4	bioGrid	human_orth
								P35222	bar-1		mes-2	bioGrid	human_orth			P35222	bar-1		hda-5	bioGrid	human_orth
								P35222	bar-1		misc-1	bioGrid	human_orth			P35222	bar-1		hda-6	bioGrid	human_orth
								P35222	bar-1		miz-1	bioGrid	human_orth			P35222	bar-1		hecd-1	bioGrid	human_orth
								P35222	bar-1		mlc-2	bioGrid	human_orth			P35222	bar-1		hel-1	bioGrid	human_orth
								P35222	bar-1		mlc-6	bioGrid	human_orth			P35222	bar-1		herc-1	bioGrid	human_orth
								P35222	bar-1		myo-1	bioGrid	human_orth			P35222	bar-1		hif-1	bioGrid	human_orth
								P35222	bar-1		ndx-2	bioGrid	human_orth			P35222	bar-1		hif-1	bioGrid	human_orth
								P35222	bar-1		nhr-259	bioGrid	human_orth			P35222	bar-1		hint-1	bioGrid	human_orth
								P35222	bar-1		nhr-41	bioGrid	human_orth			P35222	bar-1		HIST1H1C	bioGrid	human_orth
								P35222	bar-1		nhr-41	bioGrid	human_orth			P35222	bar-1		HIST1H3A	bioGrid	human_orth
								P35222	bar-1		nhr-6	bioGrid	human_orth			P35222	bar-1		HIST1H4A	bioGrid	human_orth
								P35222	bar-1		nhr-85	bioGrid	human_orth			P35222	bar-1		hlh-2	bioGrid	human_orth
								P35222	bar-1		nhr-91	bioGrid	human_orth			P35222	bar-1		hlh-2	bioGrid	human_orth
								P35222	bar-1		nhr-91	bioGrid	human_orth			P35222	bar-1		hmbx-1	bioGrid	human_orth
								P35222	bar-1		nnt-1	bioGrid	human_orth			P35222	bar-1		hmg-1.2	bioGrid	human_orth
								P35222	bar-1		nono-1	bioGrid	human_orth			P35222	bar-1		hmg-1.2	bioGrid	human_orth
								P35222	bar-1		npp-10	bioGrid	human_orth			P35222	bar-1		hmg-5	bioGrid	human_orth
								P35222	bar-1		npp-13	bioGrid	human_orth			P35222	bar-1		hmp-1	bioGrid	human_orth
								P35222	bar-1		npp-14	bioGrid	human_orth			P35222	bar-1		hmp-1	bioGrid	human_orth
								P35222	bar-1		npp-20	bioGrid	human_orth			P35222	bar-1		hmp-1	bioGrid	human_orth
								P35222	bar-1		npp-9	bioGrid	human_orth			P35222	bar-1		hmp-2	bioGrid	human_orth
								P35222	bar-1		nprl-2	bioGrid	human_orth			P35222	bar-1		hpl-1	bioGrid	human_orth
								P35222	bar-1		nrfl-1	bioGrid	human_orth			P35222	bar-1		hpl-1	bioGrid	human_orth
								P35222	bar-1		nrfl-1	bioGrid	human_orth			P35222	bar-1		hrp-1	bioGrid	human_orth
								P35222	bar-1		ntl-2	bioGrid	human_orth			P35222	bar-1		hrp-1	bioGrid	human_orth
								P35222	bar-1		nud-1	bioGrid	human_orth			P35222	bar-1		hrp-2	bioGrid	human_orth
								P35222	bar-1		nuo-1	bioGrid	human_orth			P35222	bar-1		hrpk-1	bioGrid	human_orth
								P35222	bar-1		nxf-1	bioGrid	human_orth			P35222	bar-1		hsp-1	bioGrid	human_orth
								P35222	bar-1		otub-1	bioGrid	human_orth			P35222	bar-1		hsp-1	bioGrid	human_orth
								P35222	bar-1		paa-1	bioGrid	human_orth			P35222	bar-1		hsp-110	bioGrid	human_orth
								P35222	bar-1		pab-1	bioGrid	human_orth			P35222	bar-1		hsp-110	bioGrid	human_orth
								P35222	bar-1		pab-1	bioGrid	human_orth			P35222	bar-1		hsp-4	bioGrid	human_orth
								P35222	bar-1		panl-2	bioGrid	human_orth			P35222	bar-1		hsp-6	bioGrid	human_orth
								P35222	bar-1		par-3	bioGrid	human_orth			P35222	bar-1		hsp-60	bioGrid	human_orth
								P35222	bar-1		PARK2	bioGrid	human_orth			P35222	bar-1		hum-1	bioGrid	human_orth
								P35222	bar-1		parp-1	bioGrid	human_orth			P35222	bar-1		hum-1	bioGrid	human_orth
								P35222	bar-1		pas-5	bioGrid	human_orth			P35222	bar-1		hum-2	bioGrid	human_orth
								P35222	bar-1		pat-4	bioGrid	human_orth			P35222	bar-1		hum-2	bioGrid	human_orth
								P35222	bar-1		pbs-1	bioGrid	human_orth			P35222	bar-1		icd-1	bioGrid	human_orth
								P35222	bar-1		pbs-1	bioGrid	human_orth			P35222	bar-1		idhb-1	bioGrid	human_orth
								P35222	bar-1		pcn-1	bioGrid	human_orth			P35222	bar-1		ifa-1	bioGrid	human_orth
								P35222	bar-1		pes-7	bioGrid	human_orth			P35222	bar-1		ikke-1	bioGrid	human_orth
								P35222	bar-1		pgk-1	bioGrid	human_orth			P35222	bar-1		ikke-1	bioGrid	human_orth
								P35222	bar-1		phb-2	bioGrid	human_orth			P35222	bar-1		immt-1	bioGrid	human_orth
								P35222	bar-1		phf-15	bioGrid	human_orth			P35222	bar-1		imph-1	bioGrid	human_orth
								P35222	bar-1		piki-1	bioGrid	human_orth			P35222	bar-1		isw-1	bioGrid	human_orth
								P35222	bar-1		pinn-1	bioGrid	human_orth			P35222	bar-1		jac-1	bioGrid	human_orth
								P35222	bar-1		pkd-2	bioGrid	human_orth			P35222	bar-1		jac-1	bioGrid	human_orth
								P35222	bar-1		plk-1	bioGrid	human_orth			P35222	bar-1		jac-1	bioGrid	human_orth
								P35222	bar-1		pmr-1	bioGrid	human_orth			P35222	bar-1		jac-1	bioGrid	human_orth
								P35222	bar-1		pno-1	bioGrid	human_orth			P35222	bar-1		jac-1	bioGrid	human_orth
								P35222	bar-1		pop-1	bioGrid	human_orth			P35222	bar-1		jnk-1	bioGrid	human_orth
								P35222	bar-1		pop-1	bioGrid	human_orth			P35222	bar-1		jnk-1	bioGrid	human_orth
								P35222	bar-1		PPP2R4	bioGrid	human_orth			P35222	bar-1		josd-1	bioGrid	human_orth
								P35222	bar-1		prp-19	bioGrid	human_orth			P35222	bar-1		josd-1	bioGrid	human_orth
								P35222	bar-1		prp-6	bioGrid	human_orth			P35222	bar-1		K02F3.2	bioGrid	human_orth
								P35222	bar-1		psf-1	bioGrid	human_orth			P35222	bar-1		K04C2.2	bioGrid	human_orth
								P35222	bar-1		ptp-1	bioGrid	human_orth			P35222	bar-1		K04D7.4	bioGrid	human_orth
								P35222	bar-1		ptp-3	bioGrid	human_orth			P35222	bar-1		K07C5.3	bioGrid	human_orth
								P35222	bar-1		pxl-1	bioGrid	human_orth			P35222	bar-1		K07E3.4	bioGrid	human_orth
								P35222	bar-1		pyk-2	bioGrid	human_orth			P35222	bar-1		K07H8.10	bioGrid	human_orth
								P35222	bar-1		pyr-1	bioGrid	human_orth			P35222	bar-1		K07H8.9	bioGrid	human_orth
								P35222	bar-1		rab-11.1	bioGrid	human_orth			P35222	bar-1		K08C9.7	bioGrid	human_orth
								P35222	bar-1		rab-8	bioGrid	human_orth			P35222	bar-1		K08C9.7	bioGrid	human_orth
								P35222	bar-1		rac-2	bioGrid	human_orth			P35222	bar-1		K11H3.3	bioGrid	human_orth
								P35222	bar-1		rae-1	bioGrid	human_orth			P35222	bar-1		KIAA1429	bioGrid	human_orth
								P35222	bar-1		RARS	bioGrid	human_orth			P35222	bar-1		kin-19	bioGrid	human_orth
								P35222	bar-1		ras-1	bioGrid	human_orth			P35222	bar-1		klc-2	bioGrid	human_orth
								P35222	bar-1		rbbp-5	bioGrid	human_orth			P35222	bar-1		klf-2	bioGrid	human_orth
								P35222	bar-1		rbm-17	bioGrid	human_orth			P35222	bar-1		klp-20	bioGrid	human_orth
								P35222	bar-1		ref-2	bioGrid	human_orth			P35222	bar-1		lact-9	bioGrid	human_orth
								P35222	bar-1		ret-1	bioGrid	human_orth			P35222	bar-1		laf-1	bioGrid	human_orth
								P35222	bar-1		rha-1	bioGrid	human_orth			P35222	bar-1		LARS	bioGrid	human_orth
								P35222	bar-1		rla-0	bioGrid	human_orth			P35222	bar-1		ldh-1	bioGrid	human_orth
								P35222	bar-1		rnp-5	bioGrid	human_orth			P35222	bar-1		lec-6	bioGrid	human_orth
								P35222	bar-1		rnt-1	bioGrid	human_orth			P35222	bar-1		lec-6	bioGrid	human_orth
								P35222	bar-1		rnt-1	bioGrid	human_orth			P35222	bar-1		leo-1	bioGrid	human_orth
								P35222	bar-1		rpa-1	bioGrid	human_orth			P35222	bar-1		let-23	bioGrid	human_orth
								P35222	bar-1		rpa-4	bioGrid	human_orth			P35222	bar-1		let-23	bioGrid	human_orth
								P35222	bar-1		rpac-40	bioGrid	human_orth			P35222	bar-1		let-418	bioGrid	human_orth
								P35222	bar-1		rpl-1	bioGrid	human_orth			P35222	bar-1		let-60	bioGrid	human_orth
								P35222	bar-1		rpl-10	bioGrid	human_orth			P35222	bar-1		lev-11	bioGrid	human_orth
								P35222	bar-1		rpl-11.2	bioGrid	human_orth			P35222	bar-1		lev-11	bioGrid	human_orth
								P35222	bar-1		rpl-12	bioGrid	human_orth			P35222	bar-1		lgg-2	bioGrid	human_orth
								P35222	bar-1		rpl-13	bioGrid	human_orth			P35222	bar-1		lim-8	bioGrid	human_orth
								P35222	bar-1		rpl-18	bioGrid	human_orth			P35222	bar-1		lim-8	bioGrid	human_orth
								P35222	bar-1		rpl-2	bioGrid	human_orth			P35222	bar-1		lim-9	bioGrid	human_orth
								P35222	bar-1		rpl-20	bioGrid	human_orth			P35222	bar-1		lin-18	bioGrid	human_orth
								P35222	bar-1		rpl-23	bioGrid	human_orth			P35222	bar-1		lin-23	bioGrid	human_orth
								P35222	bar-1		rpl-25.1	bioGrid	human_orth			P35222	bar-1		lin-23	bioGrid	human_orth
								P35222	bar-1		rpl-28	bioGrid	human_orth			P35222	bar-1		lin-31	bioGrid	human_orth
								P35222	bar-1		rpl-3	bioGrid	human_orth			P35222	bar-1		lit-1	bioGrid	human_orth
								P35222	bar-1		rpl-30	bioGrid	human_orth			P35222	bar-1		lmn-1	bioGrid	human_orth
								P35222	bar-1		rpl-31	bioGrid	human_orth			P35222	bar-1		lmp-2	bioGrid	human_orth
								P35222	bar-1		rpl-33	bioGrid	human_orth			P35222	bar-1		lpd-5	bioGrid	human_orth
								P35222	bar-1		rpl-4	bioGrid	human_orth			P35222	bar-1		lrp-1	bioGrid	human_orth
								P35222	bar-1		rpl-9	bioGrid	human_orth			P35222	bar-1		M04D5.1	bioGrid	human_orth
								P35222	bar-1		rpn-10	bioGrid	human_orth			P35222	bar-1		M04D5.1	bioGrid	human_orth
								P35222	bar-1		rpn-2	bioGrid	human_orth			P35222	bar-1		M142.5	bioGrid	human_orth
								P35222	bar-1		rpn-3	bioGrid	human_orth			P35222	bar-1		mab-9	bioGrid	human_orth
								P35222	bar-1		rpn-8	bioGrid	human_orth			P35222	bar-1		mag-1	bioGrid	human_orth
								P35222	bar-1		rps-0	bioGrid	human_orth			P35222	bar-1		magi-1	bioGrid	human_orth
								P35222	bar-1		rps-1	bioGrid	human_orth			P35222	bar-1		magi-1	bioGrid	human_orth
								P35222	bar-1		rps-10	bioGrid	human_orth			P35222	bar-1		magi-1	bioGrid	human_orth
								P35222	bar-1		rps-11	bioGrid	human_orth			P35222	bar-1		magu-4	bioGrid	human_orth
								P35222	bar-1		rps-14	bioGrid	human_orth			P35222	bar-1		mat-1	bioGrid	human_orth
								P35222	bar-1		rps-16	bioGrid	human_orth			P35222	bar-1		math-33	bioGrid	human_orth
								P35222	bar-1		rps-2	bioGrid	human_orth			P35222	bar-1		mcm-2	bioGrid	human_orth
								P35222	bar-1		rps-20	bioGrid	human_orth			P35222	bar-1		mcm-5	bioGrid	human_orth
								P35222	bar-1		rps-22	bioGrid	human_orth			P35222	bar-1		mcm-7	bioGrid	human_orth
								P35222	bar-1		rps-24	bioGrid	human_orth			P35222	bar-1		mec-12	bioGrid	human_orth
								P35222	bar-1		rps-27	bioGrid	human_orth			P35222	bar-1		mel-11	bioGrid	human_orth
								P35222	bar-1		rps-28	bioGrid	human_orth			P35222	bar-1		mel-11	bioGrid	human_orth
								P35222	bar-1		rps-3	bioGrid	human_orth			P35222	bar-1		mel-32	bioGrid	human_orth
								P35222	bar-1		rps-4	bioGrid	human_orth			P35222	bar-1		men-1	bioGrid	human_orth
								P35222	bar-1		rps-5	bioGrid	human_orth			P35222	bar-1		mes-2	bioGrid	human_orth
								P35222	bar-1		rps-6	bioGrid	human_orth			P35222	bar-1		misc-1	bioGrid	human_orth
								P35222	bar-1		rps-8	bioGrid	human_orth			P35222	bar-1		miz-1	bioGrid	human_orth
								P35222	bar-1		rpt-4	bioGrid	human_orth			P35222	bar-1		mlc-2	bioGrid	human_orth
								P35222	bar-1		rpt-5	bioGrid	human_orth			P35222	bar-1		mlc-6	bioGrid	human_orth
								P35222	bar-1		rsp-8	bioGrid	human_orth			P35222	bar-1		myo-1	bioGrid	human_orth
								P35222	bar-1		rsr-2	bioGrid	human_orth			P35222	bar-1		ndx-2	bioGrid	human_orth
								P35222	bar-1		ruvb-1	bioGrid	human_orth			P35222	bar-1		nhr-259	bioGrid	human_orth
								P35222	bar-1		ruvb-2	bioGrid	human_orth			P35222	bar-1		nhr-41	bioGrid	human_orth
								P35222	bar-1		sec-24.1	bioGrid	human_orth			P35222	bar-1		nhr-41	bioGrid	human_orth
								P35222	bar-1		sec-24.2	bioGrid	human_orth			P35222	bar-1		nhr-6	bioGrid	human_orth
								P35222	bar-1		sek-1	bioGrid	human_orth			P35222	bar-1		nhr-85	bioGrid	human_orth
								P35222	bar-1		sel-10	bioGrid	human_orth			P35222	bar-1		nhr-91	bioGrid	human_orth
								P35222	bar-1		sel-12	bioGrid	human_orth			P35222	bar-1		nhr-91	bioGrid	human_orth
								P35222	bar-1		set-12	bioGrid	human_orth			P35222	bar-1		nnt-1	bioGrid	human_orth
								P35222	bar-1		set-16	bioGrid	human_orth			P35222	bar-1		nono-1	bioGrid	human_orth
								P35222	bar-1		sgk-1	bioGrid	human_orth			P35222	bar-1		npp-10	bioGrid	human_orth
								P35222	bar-1		siah-1	bioGrid	human_orth			P35222	bar-1		npp-13	bioGrid	human_orth
								P35222	bar-1		sir-2.1	bioGrid	human_orth			P35222	bar-1		npp-14	bioGrid	human_orth
								P35222	bar-1		skr-20	bioGrid	human_orth			P35222	bar-1		npp-20	bioGrid	human_orth
								P35222	bar-1		sli-1	bioGrid	human_orth			P35222	bar-1		npp-9	bioGrid	human_orth
								P35222	bar-1		sma-2	bioGrid	human_orth			P35222	bar-1		nprl-2	bioGrid	human_orth
								P35222	bar-1		sma-2	bioGrid	human_orth			P35222	bar-1		nrfl-1	bioGrid	human_orth
								P35222	bar-1		snr-3	bioGrid	human_orth			P35222	bar-1		nrfl-1	bioGrid	human_orth
								P35222	bar-1		snr-4	bioGrid	human_orth			P35222	bar-1		ntl-2	bioGrid	human_orth
								P35222	bar-1		soc-1	bioGrid	human_orth			P35222	bar-1		nud-1	bioGrid	human_orth
								P35222	bar-1		sox-2	bioGrid	human_orth			P35222	bar-1		nuo-1	bioGrid	human_orth
								P35222	bar-1		spd-1	bioGrid	human_orth			P35222	bar-1		nxf-1	bioGrid	human_orth
								P35222	bar-1		spr-2	bioGrid	human_orth			P35222	bar-1		otub-1	bioGrid	human_orth
								P35222	bar-1		src-1	bioGrid	human_orth			P35222	bar-1		paa-1	bioGrid	human_orth
								P35222	bar-1		src-1	bioGrid	human_orth			P35222	bar-1		pab-1	bioGrid	human_orth
								P35222	bar-1		ssl-1	bioGrid	human_orth			P35222	bar-1		pab-1	bioGrid	human_orth
								P35222	bar-1		sta-1	bioGrid	human_orth			P35222	bar-1		panl-2	bioGrid	human_orth
								P35222	bar-1		sti-1	bioGrid	human_orth			P35222	bar-1		par-3	bioGrid	human_orth
								P35222	bar-1		sucl-2	bioGrid	human_orth			P35222	bar-1		PARK2	bioGrid	human_orth
								P35222	bar-1		sup-46	bioGrid	human_orth			P35222	bar-1		parp-1	bioGrid	human_orth
								P35222	bar-1		swsn-4	bioGrid	human_orth			P35222	bar-1		pas-5	bioGrid	human_orth
								P35222	bar-1		swsn-6	bioGrid	human_orth			P35222	bar-1		pat-4	bioGrid	human_orth
								P35222	bar-1		T02H6.11	bioGrid	human_orth			P35222	bar-1		pbs-1	bioGrid	human_orth
								P35222	bar-1		T05E11.3	bioGrid	human_orth			P35222	bar-1		pbs-1	bioGrid	human_orth
								P35222	bar-1		T05E11.3	bioGrid	human_orth			P35222	bar-1		pcn-1	bioGrid	human_orth
								P35222	bar-1		T09B4.6	bioGrid	human_orth			P35222	bar-1		pes-7	bioGrid	human_orth
								P35222	bar-1		T13H5.1	bioGrid	human_orth			P35222	bar-1		pgk-1	bioGrid	human_orth
								P35222	bar-1		T13H5.1	bioGrid	human_orth			P35222	bar-1		phb-2	bioGrid	human_orth
								P35222	bar-1		T22D1.3	bioGrid	human_orth			P35222	bar-1		phf-15	bioGrid	human_orth
								P35222	bar-1		T24B8.7	bioGrid	human_orth			P35222	bar-1		piki-1	bioGrid	human_orth
								P35222	bar-1		tag-304	bioGrid	human_orth			P35222	bar-1		pinn-1	bioGrid	human_orth
								P35222	bar-1		tbb-4	bioGrid	human_orth			P35222	bar-1		pkd-2	bioGrid	human_orth
								P35222	bar-1		tdp-1	bioGrid	human_orth			P35222	bar-1		plk-1	bioGrid	human_orth
								P35222	bar-1		tes-1	bioGrid	human_orth			P35222	bar-1		pmr-1	bioGrid	human_orth
								P35222	bar-1		tln-1	bioGrid	human_orth			P35222	bar-1		pno-1	bioGrid	human_orth
								P35222	bar-1		tpa-1	bioGrid	human_orth			P35222	bar-1		pop-1	bioGrid	human_orth
								P35222	bar-1		tpa-1	bioGrid	human_orth			P35222	bar-1		pop-1	bioGrid	human_orth
								P35222	bar-1		trk-1	bioGrid	human_orth			P35222	bar-1		PPP2R4	bioGrid	human_orth
								P35222	bar-1		trr-1	bioGrid	human_orth			P35222	bar-1		prp-19	bioGrid	human_orth
								P35222	bar-1		trx-2	bioGrid	human_orth			P35222	bar-1		prp-6	bioGrid	human_orth
								P35222	bar-1		tsn-1	bioGrid	human_orth			P35222	bar-1		psf-1	bioGrid	human_orth
								P35222	bar-1		ttbk-4	bioGrid	human_orth			P35222	bar-1		ptp-1	bioGrid	human_orth
								P35222	bar-1		ubc-1	bioGrid	human_orth			P35222	bar-1		ptp-3	bioGrid	human_orth
								P35222	bar-1		ubc-13	bioGrid	human_orth			P35222	bar-1		pxl-1	bioGrid	human_orth
								P35222	bar-1		ubc-18	bioGrid	human_orth			P35222	bar-1		pyk-2	bioGrid	human_orth
								P35222	bar-1		ubc-3	bioGrid	human_orth			P35222	bar-1		pyr-1	bioGrid	human_orth
								P35222	bar-1		ubc-3	bioGrid	human_orth			P35222	bar-1		rab-11.1	bioGrid	human_orth
								P35222	bar-1		ubh-2	bioGrid	human_orth			P35222	bar-1		rab-8	bioGrid	human_orth
								P35222	bar-1		ubh-2	bioGrid	human_orth			P35222	bar-1		rac-2	bioGrid	human_orth
								P35222	bar-1		ubh-2	bioGrid	human_orth			P35222	bar-1		rae-1	bioGrid	human_orth
								P35222	bar-1		ubh-4	bioGrid	human_orth			P35222	bar-1		RARS	bioGrid	human_orth
								P35222	bar-1		ubxn-3	bioGrid	human_orth			P35222	bar-1		ras-1	bioGrid	human_orth
								P35222	bar-1		unc-112	bioGrid	human_orth			P35222	bar-1		rbbp-5	bioGrid	human_orth
								P35222	bar-1		unc-116	bioGrid	human_orth			P35222	bar-1		rbm-17	bioGrid	human_orth
								P35222	bar-1		unc-15	bioGrid	human_orth			P35222	bar-1		ref-2	bioGrid	human_orth
								P35222	bar-1		unc-30	bioGrid	human_orth			P35222	bar-1		ret-1	bioGrid	human_orth
								P35222	bar-1		unc-34	bioGrid	human_orth			P35222	bar-1		rha-1	bioGrid	human_orth
								P35222	bar-1		unc-37	bioGrid	human_orth			P35222	bar-1		rla-0	bioGrid	human_orth
								P35222	bar-1		unc-37	bioGrid	human_orth			P35222	bar-1		rnp-5	bioGrid	human_orth
								P35222	bar-1		unc-60	bioGrid	human_orth			P35222	bar-1		rnt-1	bioGrid	human_orth
								P35222	bar-1		unc-94	bioGrid	human_orth			P35222	bar-1		rnt-1	bioGrid	human_orth
								P35222	bar-1		uso-1	bioGrid	human_orth			P35222	bar-1		rpa-1	bioGrid	human_orth
								P35222	bar-1		usp-33	bioGrid	human_orth			P35222	bar-1		rpa-4	bioGrid	human_orth
								P35222	bar-1		usp-33	bioGrid	human_orth			P35222	bar-1		rpac-40	bioGrid	human_orth
								P35222	bar-1		USP36	bioGrid	human_orth			P35222	bar-1		rpl-1	bioGrid	human_orth
								P35222	bar-1		vdac-1	bioGrid	human_orth			P35222	bar-1		rpl-10	bioGrid	human_orth
								P35222	bar-1		vig-1	bioGrid	human_orth			P35222	bar-1		rpl-11.2	bioGrid	human_orth
								P35222	bar-1		W03A5.4	bioGrid	human_orth			P35222	bar-1		rpl-12	bioGrid	human_orth
								P35222	bar-1		WHSC1	bioGrid	human_orth			P35222	bar-1		rpl-13	bioGrid	human_orth
								P35222	bar-1		wts-1	bioGrid	human_orth			P35222	bar-1		rpl-18	bioGrid	human_orth
								P35222	bar-1		wwp-1	bioGrid	human_orth			P35222	bar-1		rpl-2	bioGrid	human_orth
								P35222	bar-1		xpo-1	bioGrid	human_orth			P35222	bar-1		rpl-20	bioGrid	human_orth
								P35222	bar-1		Y106G6D.5	bioGrid	human_orth			P35222	bar-1		rpl-23	bioGrid	human_orth
								P35222	bar-1		Y108G3AL.2	bioGrid	human_orth			P35222	bar-1		rpl-25.1	bioGrid	human_orth
								P35222	bar-1		Y110A7A.2	bioGrid	human_orth			P35222	bar-1		rpl-28	bioGrid	human_orth
								P35222	bar-1		Y11D7A.14	bioGrid	human_orth			P35222	bar-1		rpl-3	bioGrid	human_orth
								P35222	bar-1		Y22D7AL.10	bioGrid	human_orth			P35222	bar-1		rpl-30	bioGrid	human_orth
								P35222	bar-1		Y41E3.11	bioGrid	human_orth			P35222	bar-1		rpl-31	bioGrid	human_orth
								P35222	bar-1		Y43F8B.19	bioGrid	human_orth			P35222	bar-1		rpl-33	bioGrid	human_orth
								P35222	bar-1		Y45G5AM.2	bioGrid	human_orth			P35222	bar-1		rpl-4	bioGrid	human_orth
								P35222	bar-1		Y48G10A.3	bioGrid	human_orth			P35222	bar-1		rpl-9	bioGrid	human_orth
								P35222	bar-1		Y50C1A.1	bioGrid	human_orth			P35222	bar-1		rpn-10	bioGrid	human_orth
								P35222	bar-1		Y55F3AM.3	bioGrid	human_orth			P35222	bar-1		rpn-2	bioGrid	human_orth
								P35222	bar-1		Y55F3BR.1	bioGrid	human_orth			P35222	bar-1		rpn-3	bioGrid	human_orth
								P35222	bar-1		Y67D2.2	bioGrid	human_orth			P35222	bar-1		rpn-8	bioGrid	human_orth
								P35222	bar-1		Y71F9B.9	bioGrid	human_orth			P35222	bar-1		rps-0	bioGrid	human_orth
								P35222	bar-1		Y94H6A.7	bioGrid	human_orth			P35222	bar-1		rps-1	bioGrid	human_orth
								P35222	bar-1		Y95B8A.8	bioGrid	human_orth			P35222	bar-1		rps-10	bioGrid	human_orth
								P35222	bar-1		Y95B8A.8	bioGrid	human_orth			P35222	bar-1		rps-11	bioGrid	human_orth
								P35222	bar-1		yap-1	bioGrid	human_orth			P35222	bar-1		rps-14	bioGrid	human_orth
								P35222	bar-1		ZK1248.19	bioGrid	human_orth			P35222	bar-1		rps-16	bioGrid	human_orth
								P35222	bar-1		ZK512.4	bioGrid	human_orth			P35222	bar-1		rps-2	bioGrid	human_orth
								P35222	bar-1		ztf-11	bioGrid	human_orth			P35222	bar-1		rps-20	bioGrid	human_orth
								P35222	bar-1		ztf-14	bioGrid	human_orth			P35222	bar-1		rps-22	bioGrid	human_orth
								Q16740	clpp-1		EGFR	bioGrid	human_orth			P35222	bar-1		rps-24	bioGrid	human_orth
								Q16740	clpp-1		FBXO17	bioGrid	human_orth			P35222	bar-1		rps-27	bioGrid	human_orth
								Q16740	clpp-1		FBXO17	bioGrid	human_orth			P35222	bar-1		rps-28	bioGrid	human_orth
								Q16740	clpp-1		ZNF133	bioGrid	human_orth			P35222	bar-1		rps-3	bioGrid	human_orth
								Q16740	clpp-1		IMPDH1	bioGrid	human_orth			P35222	bar-1		rps-4	bioGrid	human_orth
								Q16740	clpp-1		TRIM43	bioGrid	human_orth			P35222	bar-1		rps-5	bioGrid	human_orth
								Q16740	clpp-1		SCO1	bioGrid	human_orth			P35222	bar-1		rps-6	bioGrid	human_orth
								Q16740	clpp-1		COX14	bioGrid	human_orth			P35222	bar-1		rps-8	bioGrid	human_orth
								Q16740	clpp-1		TRMT61B	bioGrid	human_orth			P35222	bar-1		rpt-4	bioGrid	human_orth
								Q16740	clpp-1		AURKAIP1	bioGrid	human_orth			P35222	bar-1		rpt-5	bioGrid	human_orth
								Q16740	clpp-1		LDHB	bioGrid	human_orth			P35222	bar-1		rsp-8	bioGrid	human_orth
								Q16740	clpp-1		mel-32	bioGrid	human_orth			P35222	bar-1		rsr-2	bioGrid	human_orth
								Q16740	clpp-1		GAP43	bioGrid	human_orth			P35222	bar-1		ruvb-1	bioGrid	human_orth
								Q16740	clpp-1		COL6A1	bioGrid	human_orth			P35222	bar-1		ruvb-2	bioGrid	human_orth
								Q16740	clpp-1		COL11A1	bioGrid	human_orth			P35222	bar-1		sec-24.1	bioGrid	human_orth
								Q16740	clpp-1		aha-1	bioGrid	human_orth			P35222	bar-1		sec-24.2	bioGrid	human_orth
								Q16740	clpp-1		aha-1	bioGrid	human_orth			P35222	bar-1		sek-1	bioGrid	human_orth
								Q16740	clpp-1		C35A11.4	bioGrid	human_orth			P35222	bar-1		sel-10	bioGrid	human_orth
								Q16740	clpp-1		C35D10.5	bioGrid	human_orth			P35222	bar-1		sel-12	bioGrid	human_orth
								Q16740	clpp-1		calu-2	bioGrid	human_orth			P35222	bar-1		set-12	bioGrid	human_orth
								Q16740	clpp-1		D2030.2	bioGrid	human_orth			P35222	bar-1		set-16	bioGrid	human_orth
								Q16740	clpp-1		ech-1.1	bioGrid	human_orth			P35222	bar-1		sgk-1	bioGrid	human_orth
								Q16740	clpp-1		fdps-1	bioGrid	human_orth			P35222	bar-1		siah-1	bioGrid	human_orth
								Q16740	clpp-1		hsp-110	bioGrid	human_orth			P35222	bar-1		sir-2.1	bioGrid	human_orth
								Q16740	clpp-1		hsp-60	bioGrid	human_orth			P35222	bar-1		skr-20	bioGrid	human_orth
								Q16740	clpp-1		lin-23	bioGrid	human_orth			P35222	bar-1		sli-1	bioGrid	human_orth
								Q16740	clpp-1		M01E5.2	bioGrid	human_orth			P35222	bar-1		sma-2	bioGrid	human_orth
								Q16740	clpp-1		M04B2.4	bioGrid	human_orth			P35222	bar-1		sma-2	bioGrid	human_orth
								Q16740	clpp-1		M153.1	bioGrid	human_orth			P35222	bar-1		snr-3	bioGrid	human_orth
								Q16740	clpp-1		M153.1	bioGrid	human_orth			P35222	bar-1		snr-4	bioGrid	human_orth
								Q16740	clpp-1		men-1	bioGrid	human_orth			P35222	bar-1		soc-1	bioGrid	human_orth
								Q16740	clpp-1		mrpl-12	bioGrid	human_orth			P35222	bar-1		sox-2	bioGrid	human_orth
								Q16740	clpp-1		mrps-30	bioGrid	human_orth			P35222	bar-1		spd-1	bioGrid	human_orth
								Q16740	clpp-1		mrps-30	bioGrid	human_orth			P35222	bar-1		spr-2	bioGrid	human_orth
								Q16740	clpp-1		nuo-4	bioGrid	human_orth			P35222	bar-1		src-1	bioGrid	human_orth
								Q16740	clpp-1		nuo-4	bioGrid	human_orth			P35222	bar-1		src-1	bioGrid	human_orth
								Q16740	clpp-1		oatr-1	bioGrid	human_orth			P35222	bar-1		ssl-1	bioGrid	human_orth
								Q16740	clpp-1		pacs-1	bioGrid	human_orth			P35222	bar-1		sta-1	bioGrid	human_orth
								Q16740	clpp-1		pdhk-2	bioGrid	human_orth			P35222	bar-1		sti-1	bioGrid	human_orth
								Q16740	clpp-1		prdx-3	bioGrid	human_orth			P35222	bar-1		sucl-2	bioGrid	human_orth
								Q16740	clpp-1		pyp-1	bioGrid	human_orth			P35222	bar-1		sup-46	bioGrid	human_orth
								Q16740	clpp-1		pyp-1	bioGrid	human_orth			P35222	bar-1		swsn-4	bioGrid	human_orth
								Q16740	clpp-1		snrp-27	bioGrid	human_orth			P35222	bar-1		swsn-6	bioGrid	human_orth
								Q16740	clpp-1		swsn-9	bioGrid	human_orth			P35222	bar-1		T02H6.11	bioGrid	human_orth
								Q16740	clpp-1		T05H10.1	bioGrid	human_orth			P35222	bar-1		T05E11.3	bioGrid	human_orth
								Q16740	clpp-1		wah-1	bioGrid	human_orth			P35222	bar-1		T05E11.3	bioGrid	human_orth
								Q16740	clpp-1		Y17G9B.5	bioGrid	human_orth			P35222	bar-1		T09B4.6	bioGrid	human_orth
								Q16740	clpp-1		Y17G9B.5	bioGrid	human_orth			P35222	bar-1		T13H5.1	bioGrid	human_orth
								Q16740	clpp-1		Y45F3A.9	bioGrid	human_orth			P35222	bar-1		T13H5.1	bioGrid	human_orth
								Q01826	dve-1		CHD3	bioGrid	human_orth			P35222	bar-1		T22D1.3	bioGrid	human_orth
								Q01826	dve-1		CTNNB1	bioGrid	human_orth			P35222	bar-1		T24B8.7	bioGrid	human_orth
								Q01826	dve-1		PIAS1	bioGrid	human_orth			P35222	bar-1		tag-304	bioGrid	human_orth
								Q01826	dve-1		PIAS3	bioGrid	human_orth			P35222	bar-1		tbb-4	bioGrid	human_orth
								Q01826	dve-1		PIAS4	bioGrid	human_orth			P35222	bar-1		tdp-1	bioGrid	human_orth
								Q01826	dve-1		PML	bioGrid	human_orth			P35222	bar-1		tes-1	bioGrid	human_orth
								Q01826	dve-1		SMARCA5	bioGrid	human_orth			P35222	bar-1		tln-1	bioGrid	human_orth
								Q01826	dve-1		TAL1	bioGrid	human_orth			P35222	bar-1		tpa-1	bioGrid	human_orth
								Q01826	dve-1		QPRT	bioGrid	human_orth			P35222	bar-1		tpa-1	bioGrid	human_orth
								Q01826	dve-1		TEAD2	bioGrid	human_orth			P35222	bar-1		trk-1	bioGrid	human_orth
								Q01826	dve-1		FOXA1	bioGrid	human_orth			P35222	bar-1		trr-1	bioGrid	human_orth
								Q01826	dve-1		FOXB1	bioGrid	human_orth			P35222	bar-1		trx-2	bioGrid	human_orth
								Q01826	dve-1		FOXC1	bioGrid	human_orth			P35222	bar-1		tsn-1	bioGrid	human_orth
								Q01826	dve-1		FOXC2	bioGrid	human_orth			P35222	bar-1		ttbk-4	bioGrid	human_orth
								Q01826	dve-1		FOXD3	bioGrid	human_orth			P35222	bar-1		ubc-1	bioGrid	human_orth
								Q01826	dve-1		FOXE1	bioGrid	human_orth			P35222	bar-1		ubc-13	bioGrid	human_orth
								Q01826	dve-1		FOXF1	bioGrid	human_orth			P35222	bar-1		ubc-18	bioGrid	human_orth
								Q01826	dve-1		FOXG1	bioGrid	human_orth			P35222	bar-1		ubc-3	bioGrid	human_orth
								Q01826	dve-1		FOXL1	bioGrid	human_orth			P35222	bar-1		ubc-3	bioGrid	human_orth
								Q01826	dve-1		FOXN1	bioGrid	human_orth			P35222	bar-1		ubh-2	bioGrid	human_orth
								Q01826	dve-1		FOXO1	bioGrid	human_orth			P35222	bar-1		ubh-2	bioGrid	human_orth
								Q01826	dve-1		FOXP1	bioGrid	human_orth			P35222	bar-1		ubh-2	bioGrid	human_orth
								Q01826	dve-1		FOXP3	bioGrid	human_orth			P35222	bar-1		ubh-4	bioGrid	human_orth
								Q01826	dve-1		FOXQ1	bioGrid	human_orth			P35222	bar-1		ubxn-3	bioGrid	human_orth
								Q01826	dve-1		FOXS1	bioGrid	human_orth			P35222	bar-1		unc-112	bioGrid	human_orth
								Q01826	dve-1		NFATC1	bioGrid	human_orth			P35222	bar-1		unc-116	bioGrid	human_orth
								Q01826	dve-1		NFATC2	bioGrid	human_orth			P35222	bar-1		unc-15	bioGrid	human_orth
								Q01826	dve-1		SMURF2	bioGrid	human_orth			P35222	bar-1		unc-30	bioGrid	human_orth
								Q01826	dve-1		SUMO1	bioGrid	human_orth			P35222	bar-1		unc-34	bioGrid	human_orth
								Q01826	dve-1		SUMO1P1	bioGrid	human_orth			P35222	bar-1		unc-37	bioGrid	human_orth
								Q01826	dve-1		TOPORS	bioGrid	human_orth			P35222	bar-1		unc-37	bioGrid	human_orth
								Q01826	dve-1		UBR5	bioGrid	human_orth			P35222	bar-1		unc-60	bioGrid	human_orth
								Q01826	dve-1		KIAA1429	bioGrid	human_orth			P35222	bar-1		unc-94	bioGrid	human_orth
								Q01826	dve-1		baz-2	bioGrid	human_orth			P35222	bar-1		uso-1	bioGrid	human_orth
								Q01826	dve-1		baz-2	bioGrid	human_orth			P35222	bar-1		usp-33	bioGrid	human_orth
								Q01826	dve-1		cbp-2	bioGrid	human_orth			P35222	bar-1		usp-33	bioGrid	human_orth
								Q01826	dve-1		ceh-44	bioGrid	human_orth			P35222	bar-1		USP36	bioGrid	human_orth
								Q01826	dve-1		csp-3	bioGrid	human_orth			P35222	bar-1		vdac-1	bioGrid	human_orth
								Q01826	dve-1		ctbp-1	bioGrid	human_orth			P35222	bar-1		vig-1	bioGrid	human_orth
								Q01826	dve-1		F19B2.6	bioGrid	human_orth			P35222	bar-1		W03A5.4	bioGrid	human_orth
								Q01826	dve-1		hda-4	bioGrid	human_orth			P35222	bar-1		WHSC1	bioGrid	human_orth
								Q01826	dve-1		hda-5	bioGrid	human_orth			P35222	bar-1		wts-1	bioGrid	human_orth
								Q01826	dve-1		hpl-1	bioGrid	human_orth			P35222	bar-1		wwp-1	bioGrid	human_orth
								Q01826	dve-1		lag-1	bioGrid	human_orth			P35222	bar-1		xpo-1	bioGrid	human_orth
								Q01826	dve-1		lin-40	bioGrid	human_orth			P35222	bar-1		Y106G6D.5	bioGrid	human_orth
								Q01826	dve-1		miz-1	bioGrid	human_orth			P35222	bar-1		Y108G3AL.2	bioGrid	human_orth
								Q01826	dve-1		rpb-11	bioGrid	human_orth			P35222	bar-1		Y110A7A.2	bioGrid	human_orth
								Q01826	dve-1		sin-3	bioGrid	human_orth			P35222	bar-1		Y11D7A.14	bioGrid	human_orth
								Q01826	dve-1		sir-2.1	bioGrid	human_orth			P35222	bar-1		Y22D7AL.10	bioGrid	human_orth
								Q01826	dve-1		sox-2	bioGrid	human_orth			P35222	bar-1		Y41E3.11	bioGrid	human_orth
								Q01826	dve-1		T05H10.1	bioGrid	human_orth			P35222	bar-1		Y43F8B.19	bioGrid	human_orth
								Q01826	dve-1		tatn-1	bioGrid	human_orth			P35222	bar-1		Y45G5AM.2	bioGrid	human_orth
								Q01826	dve-1		tpa-1	bioGrid	human_orth			P35222	bar-1		Y48G10A.3	bioGrid	human_orth
								Q01826	dve-1		ubc-9	bioGrid	human_orth			P35222	bar-1		Y50C1A.1	bioGrid	human_orth
								Q01826	dve-1		Y43F8B.19	bioGrid	human_orth			P35222	bar-1		Y55F3AM.3	bioGrid	human_orth
								Q9UBV4	egl-20		cnx-1	bioGrid	human_orth			P35222	bar-1		Y55F3BR.1	bioGrid	human_orth
								Q9UBV4	egl-20		mig-14	bioGrid	human_orth			P35222	bar-1		Y67D2.2	bioGrid	human_orth
								Q9UBV4	egl-20		nhr-41	bioGrid	human_orth			P35222	bar-1		Y71F9B.9	bioGrid	human_orth
								Q9UBV4	egl-20		fubl-1	bioGrid	human_orth			P35222	bar-1		Y94H6A.7	bioGrid	human_orth
								Q9UBV4	egl-20		tor-2	bioGrid	human_orth			P35222	bar-1		Y95B8A.8	bioGrid	human_orth
								Q9UBV4	egl-20		sul-2	bioGrid	human_orth			P35222	bar-1		Y95B8A.8	bioGrid	human_orth
								Q9UBV4	egl-20		F26A1.14	bioGrid	human_orth			P35222	bar-1		yap-1	bioGrid	human_orth
								Q9UBV4	egl-20		mec-7	bioGrid	human_orth			P35222	bar-1		ZK1248.19	bioGrid	human_orth
								Q9UBV4	egl-20		WNT11	bioGrid	human_orth			P35222	bar-1		ZK512.4	bioGrid	human_orth
								Q9UBV4	egl-20		BCL6	bioGrid	human_orth			P35222	bar-1		ztf-11	bioGrid	human_orth
								Q9UBV4	egl-20		cwn-2	bioGrid	human_orth			P35222	bar-1		ztf-14	bioGrid	human_orth
								Q9P2K8	gcn-2		arr-1	bioGrid	human_orth			P14923	bar-1	P61221	abce-1	Mentha	human_orth
								Q9P2K8	gcn-2		C14C10.4	bioGrid	human_orth			P14923	bar-1	O95405	aka-1	Mentha	human_orth
								Q9P2K8	gcn-2		edc-4	bioGrid	human_orth			P14923	bar-1	P25054	apr-1	Mentha	human_orth
								Q9P2K8	gcn-2		emr-1	bioGrid	human_orth			P14923	bar-1	O15169	AXIN1	Mentha	human_orth
								Q9P2K8	gcn-2		F41E7.6	bioGrid	human_orth			P14923	bar-1	Q13490	bir-2	Mentha	human_orth
								Q9P2K8	gcn-2		hrpl-1	bioGrid	human_orth			P14923	bar-1	P15291	bre-4	Mentha	human_orth
								Q9P2K8	gcn-2		hsp-75	bioGrid	human_orth			P14923	bar-1	Q9HAW0	BRF2	Mentha	human_orth
								Q9P2K8	gcn-2		R08C7.8	bioGrid	human_orth			P14923	bar-1	P57076	C21ORF59	Mentha	human_orth
								Q9P2K8	gcn-2		R08C7.8	bioGrid	human_orth			P14923	bar-1	P04040	CAT	Mentha	human_orth
								Q9P2K8	gcn-2		rpt-5	bioGrid	human_orth			P14923	bar-1	Q92793	cbp-2	Mentha	human_orth
								Q9P2K8	gcn-2		tkt-1	bioGrid	human_orth			P14923	bar-1	Q09472	cbp-2	Mentha	human_orth
								Q9P2K8	gcn-2		usp-46	bioGrid	human_orth			P14923	bar-1	P13994	CCDC130	Mentha	human_orth
								Q9P2K8	gcn-2		Y56A3A.16	bioGrid	human_orth			P14923	bar-1	Q9H0W5	CCDC8	Mentha	human_orth
								Q9P2K8	gcn-2		Y71F9B.9	bioGrid	human_orth			P14923	bar-1	Q6P1J9	cdc-73	Mentha	human_orth
								Q9P2K8	gcn-2		GGNBP1	bioGrid	human_orth			P14923	bar-1	P12830	CDH1	Mentha	human_orth
								Q9P2K8	gcn-2		FAM153B	bioGrid	human_orth			P14923	bar-1	Q9Y6N8	CDH10	Mentha	human_orth
								Q9P2K8	gcn-2		TARS	bioGrid	human_orth			P14923	bar-1	P19022	CDH2	Mentha	human_orth
								Q9P2K8	gcn-2		MATR3	bioGrid	human_orth			P14923	bar-1	P22223	CDH3	Mentha	human_orth
								Q9P2K8	gcn-2		SEPT11	bioGrid	human_orth			P14923	bar-1	P33151	CDH5	Mentha	human_orth
								Q9P2K8	gcn-2		PALM2	bioGrid	human_orth			P14923	bar-1	P55286	CDH8	Mentha	human_orth
								Q9P2K8	gcn-2		MDM4	bioGrid	human_orth			P14923	bar-1	P24941	cdk-1	Mentha	human_orth
								Q9P2K8	gcn-2		C6orf141	bioGrid	human_orth			P14923	bar-1	P06493	CDK1	Mentha	human_orth
								Q9P2K8	gcn-2		TNIP2	bioGrid	human_orth			P14923	bar-1	Q96JB5	cdkr-3	Mentha	human_orth
								Q9P2K8	gcn-2		TNRC6A	bioGrid	human_orth			P14923	bar-1	Q6ZU80	CEP128	Mentha	human_orth
								Q9P2K8	gcn-2		KIAA1429	bioGrid	human_orth			P14923	bar-1	Q92887	cft-1	Mentha	human_orth
								Q9NRK6	haf-1		BAK1	bioGrid	human_orth			P14923	bar-1	P26196	cgh-1	Mentha	human_orth
								Q9NRK6	haf-1		CEACAM21	bioGrid	human_orth			P14923	bar-1	P15941	cnp-2	Mentha	human_orth
								Q9NRK6	haf-1		cft-1	bioGrid	human_orth			P14923	bar-1	Q92905	csn-5	Mentha	human_orth
								Q9NRK6	haf-1		CTAGE5	bioGrid	human_orth			P14923	bar-1	Q13617	cul-2	Mentha	human_orth
								Q9NRK6	haf-1		DKK3	bioGrid	human_orth			P14923	bar-1	Q13620	cul-5	Mentha	human_orth
								Q9NRK6	haf-1		F42G8.10	bioGrid	human_orth			P14923	bar-1	Q14999	CUL7	Mentha	human_orth
								Q9NRK6	haf-1		HLA-DPA1	bioGrid	human_orth			P14923	bar-1	Q9NQC7	cyld-1	Mentha	human_orth
								Q9NRK6	haf-1		IL9R	bioGrid	human_orth			P14923	bar-1	P60484	daf-18	Mentha	human_orth
								Q9NRK6	haf-1		lmtr-2	bioGrid	human_orth			P14923	bar-1	P17661	DES	Mentha	human_orth
								Q9NRK6	haf-1		nhr-41	bioGrid	human_orth			P14923	bar-1	P63167	dlc-1	Mentha	human_orth
								Q9NRK6	haf-1		NRG1	bioGrid	human_orth			P14923	bar-1	Q08554	DSC1	Mentha	human_orth
								Q9NRK6	haf-1		phb-1	bioGrid	human_orth			P14923	bar-1	Q02413	DSG1	Mentha	human_orth
								Q9NRK6	haf-1		RNF4	bioGrid	human_orth			P14923	bar-1	Q14126	DSG2	Mentha	human_orth
								Q9NRK6	haf-1		SNX4	bioGrid	human_orth			P14923	bar-1	P32926	DSG3	Mentha	human_orth
								Q9NRK6	haf-1		SYCE3	bioGrid	human_orth			P14923	bar-1	O75530	EED	Mentha	human_orth
								Q9NRK6	haf-1		tctn-1	bioGrid	human_orth			P14923	bar-1	Q9NQB0	egl-13	Mentha	human_orth
								Q9NRK6	haf-1		TRDN	bioGrid	human_orth			P14923	bar-1	P26038	erm-1	Mentha	human_orth
								Q9NRK6	haf-1		UPK1A	bioGrid	human_orth			P14923	bar-1	Q13164	F09C12.2	Mentha	human_orth
								Q9NRK6	haf-1		vpr	bioGrid	human_orth			P14923	bar-1	Q96H78	F13G3.7	Mentha	human_orth
								Q9NRK6	haf-1		Y17G9B.5	bioGrid	human_orth			P14923	bar-1	P38398	F42A6.5	Mentha	human_orth
								Q9NRK6	haf-1		Y38F1A.2	bioGrid	human_orth			P14923	bar-1	Q13011	F58A6.1	Mentha	human_orth
								Q9NRK6	haf-1		Y63D3A.7	bioGrid	human_orth			P14923	bar-1	P21333	flna-1	Mentha	human_orth
								Q9NRK6	haf-1		zipt-15	bioGrid	human_orth			P14923	bar-1	Q7Z6J6	frm-2	Mentha	human_orth
								Q9NRK6	haf-1		KCNC4	bioGrid	human_orth			P14923	bar-1	Q96IK5	gcl-1	Mentha	human_orth
								Q9NRK6	haf-1		ELAVL1	bioGrid	human_orth			P14923	bar-1	O95619	gfl-1	Mentha	human_orth
								Q9NRK6	haf-1		SLC24A5	bioGrid	human_orth			P14923	bar-1	P01241	GH1	Mentha	human_orth
								Q9NRK6	haf-1		KCNA5	bioGrid	human_orth			P14923	bar-1	P08034	GJB1	Mentha	human_orth
								Q9NRK6	haf-1		IMPDH1	bioGrid	human_orth			P14923	bar-1	Q9NWQ4	GPATCH2L	Mentha	human_orth
								P38646	hsp-6		AHNAK	bioGrid	human_orth			P14923	bar-1	P34947	grk-1	Mentha	human_orth
								P38646	hsp-6		BZW2	bioGrid	human_orth			P14923	bar-1	P35221	hmp-1	Mentha	human_orth
								P38646	hsp-6		CCDC58	bioGrid	human_orth			P14923	bar-1	P26232	hmp-1	Mentha	human_orth
								P38646	hsp-6		CDKN2A	bioGrid	human_orth			P14923	bar-1	Q9UI47	hmp-1	Mentha	human_orth
								P38646	hsp-6		DNAJA3	bioGrid	human_orth			P14923	bar-1	P35222	hmp-2	Mentha	human_orth
								P38646	hsp-6		GPRC5A	bioGrid	human_orth			P14923	bar-1	P09651	hrp-1	Mentha	human_orth
								P38646	hsp-6		HSP90AA2P	bioGrid	human_orth			P14923	bar-1	P35579	hum-2	Mentha	human_orth
								P38646	hsp-6		FGF1	bioGrid	human_orth			P14923	bar-1	Q9NSE4	iars-2	Mentha	human_orth
								P38646	hsp-6		TP53	bioGrid	human_orth			P14923	bar-1	Q9Y5U4	INSIG2	Mentha	human_orth
								P38646	hsp-6		HAX1	bioGrid	human_orth			P14923	bar-1	Q99959	jac-1	Mentha	human_orth
								P38646	hsp-6		SIRT3	bioGrid	human_orth			P14923	bar-1	Q9Y446	jac-1	Mentha	human_orth
								P38646	hsp-6		FBXO6	bioGrid	human_orth			P14923	bar-1	Q16643	K08E3.4	Mentha	human_orth
								P38646	hsp-6		SMURF1	bioGrid	human_orth			P14923	bar-1	Q9NZC7	K10H10.6	Mentha	human_orth
								P38646	hsp-6		HSPBP1	bioGrid	human_orth			P14923	bar-1	P00533	let-23	Mentha	human_orth
								P38646	hsp-6		CDH1	bioGrid	human_orth			P14923	bar-1	P04626	let-23	Mentha	human_orth
								P38646	hsp-6		TP73	bioGrid	human_orth			P14923	bar-1	O00182	LGALS9	Mentha	human_orth
								P38646	hsp-6		IQCB1	bioGrid	human_orth			P14923	bar-1	Q9H0R8	lgg-2	Mentha	human_orth
								P38646	hsp-6		NOS2	bioGrid	human_orth			P14923	bar-1	P60520	lgg-2	Mentha	human_orth
								P38646	hsp-6		ZSWIM7	bioGrid	human_orth			P14923	bar-1	Q9GZQ8	lgg-2	Mentha	human_orth
								P38646	hsp-6		NELFB	bioGrid	human_orth			P14923	bar-1	Q14192	lim-9	Mentha	human_orth
								P38646	hsp-6		ASS1	bioGrid	human_orth			P14923	bar-1	Q9UHB6	LIMA1	Mentha	human_orth
								P38646	hsp-6		TNFAIP8	bioGrid	human_orth			P14923	bar-1	A0A0S2Z4M1	lin-23	Mentha	human_orth
								P38646	hsp-6		CDKN1A	bioGrid	human_orth			P14923	bar-1	Q9Y297	lin-23	Mentha	human_orth
								P38646	hsp-6		CEP57	bioGrid	human_orth			P14923	bar-1	P35610	mboa-1	Mentha	human_orth
								P38646	hsp-6		HAUS2	bioGrid	human_orth			P14923	bar-1	P49736	mcm-2	Mentha	human_orth
								P38646	hsp-6		CEP76	bioGrid	human_orth			P14923	bar-1	P33992	mcm-5	Mentha	human_orth
								P38646	hsp-6		NEDD1	bioGrid	human_orth			P14923	bar-1	P33993	mcm-7	Mentha	human_orth
								P38646	hsp-6		TUBGCP2	bioGrid	human_orth			P14923	bar-1	Q71U36	mec-12	Mentha	human_orth
								P38646	hsp-6		TUBGCP4	bioGrid	human_orth			P14923	bar-1	Q86X19	mks-2	Mentha	human_orth
								P38646	hsp-6		CUL7	bioGrid	human_orth			P14923	bar-1	Q9BYD2	mrpl-9	Mentha	human_orth
								P38646	hsp-6		CCDC8	bioGrid	human_orth			P14923	bar-1	Q14934	NFATC4	Mentha	human_orth
								P38646	hsp-6		ID2	bioGrid	human_orth			P14923	bar-1	Q96F31	NFKBIE	Mentha	human_orth
								P38646	hsp-6		GAN	bioGrid	human_orth			P14923	bar-1	O00221	NFKBIE	Mentha	human_orth
								P38646	hsp-6		SKI	bioGrid	human_orth			P14923	bar-1	P03372	nhr-91	Mentha	human_orth
								P38646	hsp-6		ALKBH3	bioGrid	human_orth			P14923	bar-1	P01160	NPPA	Mentha	human_orth
								P38646	hsp-6		NANOG	bioGrid	human_orth			P14923	bar-1	Q9UMX2	OAZ3	Mentha	human_orth
								P38646	hsp-6		POU5F1	bioGrid	human_orth			P14923	bar-1	O75147	OBSL1	Mentha	human_orth
								P38646	hsp-6		NFATC1	bioGrid	human_orth			P14923	bar-1	Q504Q3	panl-2	Mentha	human_orth
								P38646	hsp-6		NFATC2	bioGrid	human_orth			P14923	bar-1	P16144	pat-3	Mentha	human_orth
								P38646	hsp-6		NHSL2	bioGrid	human_orth			P14923	bar-1	Q5VU43	PDE4DIP	Mentha	human_orth
								P38646	hsp-6		KIAA1191	bioGrid	human_orth			P14923	bar-1	P16284	PECAM1	Mentha	human_orth
								P38646	hsp-6		LRRC36	bioGrid	human_orth			P14923	bar-1	Q99623	phb-2	Mentha	human_orth
								P38646	hsp-6		FAM167A	bioGrid	human_orth			P14923	bar-1	Q6IQ23	PLEKHA7	Mentha	human_orth
								P38646	hsp-6		TTC25	bioGrid	human_orth			P14923	bar-1	P0CG20	PRR35	Mentha	human_orth
								P38646	hsp-6		C2orf68	bioGrid	human_orth			P14923	bar-1	P10586	ptp-3	Mentha	human_orth
								P38646	hsp-6		MTF1	bioGrid	human_orth			P14923	bar-1	Q15678	PTPN14	Mentha	human_orth
								P38646	hsp-6		FBXO7	bioGrid	human_orth			P14923	bar-1	Q12913	PTPRJ	Mentha	human_orth
								P38646	hsp-6		MED9	bioGrid	human_orth			P14923	bar-1	Q9Y3E5	PTRH2	Mentha	human_orth
								P38646	hsp-6		RAD18	bioGrid	human_orth			P14923	bar-1	O75787	R03E1.2	Mentha	human_orth
								P38646	hsp-6		RNF4	bioGrid	human_orth			P14923	bar-1	P98179	R06C1.4	Mentha	human_orth
								P38646	hsp-6		RNF31	bioGrid	human_orth			P14923	bar-1	Q96HA8	R06C7.6	Mentha	human_orth
								P38646	hsp-6		FGF11	bioGrid	human_orth			P14923	bar-1	Q12905	R11H6.5	Mentha	human_orth
								P38646	hsp-6		HEXIM1	bioGrid	human_orth			P14923	bar-1	P51149	rab-7	Mentha	human_orth
								P38646	hsp-6		LARP7	bioGrid	human_orth			P14923	bar-1	Q92930	rab-8	Mentha	human_orth
								P38646	hsp-6		RECQL4	bioGrid	human_orth			P14923	bar-1	Q96B01	RAD51AP1	Mentha	human_orth
								P38646	hsp-6		MYC	bioGrid	human_orth			P14923	bar-1	P52565	rhi-1	Mentha	human_orth
								P38646	hsp-6		NEK2	bioGrid	human_orth			P14923	bar-1	Q9H4K1	RIBC2	Mentha	human_orth
								P38646	hsp-6		METTL3	bioGrid	human_orth			P14923	bar-1	P46778	rpl-21	Mentha	human_orth
								P38646	hsp-6		METTL14	bioGrid	human_orth			P14923	bar-1	Q9UHP6	RTDR1	Mentha	human_orth
								P38646	hsp-6		WTAP	bioGrid	human_orth			P14923	bar-1	P31040	sdha-2	Mentha	human_orth
								P38646	hsp-6		SIRPA	bioGrid	human_orth			P14923	bar-1	Q9BX46	sub-12	Mentha	human_orth
								P38646	hsp-6		TET2	bioGrid	human_orth			P14923	bar-1	Q00005	sur-6	Mentha	human_orth
								P38646	hsp-6		TGM2	bioGrid	human_orth			P14923	bar-1	Q8N3V7	SYNPO	Mentha	human_orth
								P38646	hsp-6		LINC01554	bioGrid	human_orth			P14923	bar-1	Q15262	T13H5.1	Mentha	human_orth
								P38646	hsp-6		ICAM1	bioGrid	human_orth			P14923	bar-1	Q13148	tdp-1	Mentha	human_orth
								P38646	hsp-6		MAVS	bioGrid	human_orth			P14923	bar-1	P04629	trk-1	Mentha	human_orth
								P38646	hsp-6		RAP1GDS1	bioGrid	human_orth			P14923	bar-1	O94782	USP1	Mentha	human_orth
								P38646	hsp-6		SLAIN1	bioGrid	human_orth			P14923	bar-1	P15924	vab-10	Mentha	human_orth
								P38646	hsp-6		STMN1	bioGrid	human_orth			P14923	bar-1	Q15149	vab-10	Mentha	human_orth
								P38646	hsp-6		aagr-4	bioGrid	human_orth			P14923	bar-1	Q9UMX5	vem-1	Mentha	human_orth
								P38646	hsp-6		aco-2	bioGrid	human_orth			P14923	bar-1	Q9Y3E0	Y110A7A.7	Mentha	human_orth
								P38646	hsp-6		act-3	bioGrid	human_orth			P14923	bar-1	Q12906	Y95B8A.8	Mentha	human_orth
								P38646	hsp-6		aipr-1	bioGrid	human_orth			P14923	bar-1	Q9GZV5	yap-1	Mentha	human_orth
								P38646	hsp-6		air-2	bioGrid	human_orth			P14923	bar-1	Q96Q40	ZC123.4	Mentha	human_orth
								P38646	hsp-6		air-2	bioGrid	human_orth			P14923	bar-1	Q96ER9	ZC477.3	Mentha	human_orth
								P38646	hsp-6		aly-3	bioGrid	human_orth			P14923	bar-1	Q9NSA3	ZK1248.19	Mentha	human_orth
								P38646	hsp-6		apl-1	bioGrid	human_orth			P35222	bar-1	P27986	aap-1	Mentha	human_orth
								P38646	hsp-6		ard-1	bioGrid	human_orth			P35222	bar-1	P00519	abl-1	Mentha	human_orth
								P38646	hsp-6		arr-1	bioGrid	human_orth			P35222	bar-1	P60709	act-3	Mentha	human_orth
								P38646	hsp-6		atg-10	bioGrid	human_orth			P35222	bar-1	Q8WYP5	AHCTF1	Mentha	human_orth
								P38646	hsp-6		atg-16.1	bioGrid	human_orth			P35222	bar-1	P35869	ahr-1	Mentha	human_orth
								P38646	hsp-6		atx-3	bioGrid	human_orth			P35222	bar-1	O14965	air-2	Mentha	human_orth
								P38646	hsp-6		B0303.3	bioGrid	human_orth			P35222	bar-1	Q9UKB5	AJAP1	Mentha	human_orth
								P38646	hsp-6		bar-1	bioGrid	human_orth			P35222	bar-1	O95405	aka-1	Mentha	human_orth
								P38646	hsp-6		bicd-1	bioGrid	human_orth			P35222	bar-1	Q5JTC6	AMER1	Mentha	human_orth
								P38646	hsp-6		blmp-1	bioGrid	human_orth			P35222	bar-1	O14617	apd-3	Mentha	human_orth
								P38646	hsp-6		C05D11.5	bioGrid	human_orth			P35222	bar-1	P05067	apl-1	Mentha	human_orth
								P38646	hsp-6		C06A5.3	bioGrid	human_orth			P35222	bar-1	Q9UKG1	APPL1	Mentha	human_orth
								P38646	hsp-6		C15C7.7	bioGrid	human_orth			P35222	bar-1	O95996	apr-1	Mentha	human_orth
								P38646	hsp-6		C34C12.8	bioGrid	human_orth			P35222	bar-1	P05549	aptf-1	Mentha	human_orth
								P38646	hsp-6		C34D10.2	bioGrid	human_orth			P35222	bar-1	P10275	AR	Mentha	human_orth
								P38646	hsp-6		C34F6.10	bioGrid	human_orth			P35222	bar-1	Q4LE39	arid-1	Mentha	human_orth
								P38646	hsp-6		C37C3.2	bioGrid	human_orth			P35222	bar-1	Q8IUR7	ARMC8	Mentha	human_orth
								P38646	hsp-6		C39E9.11	bioGrid	human_orth			P35222	bar-1	Q9UBL3	ash-2	Mentha	human_orth
								P38646	hsp-6		C42C1.13	bioGrid	human_orth			P35222	bar-1	P16220	atf-6	Mentha	human_orth
								P38646	hsp-6		C42C1.13	bioGrid	human_orth			P35222	bar-1	P15336	atf-7	Mentha	human_orth
								P38646	hsp-6		C52E12.1	bioGrid	human_orth			P35222	bar-1	O43707	atn-1	Mentha	human_orth
								P38646	hsp-6		cand-1	bioGrid	human_orth			P35222	bar-1	Q86UU0	atx-2	Mentha	human_orth
								P38646	hsp-6		cdc-73	bioGrid	human_orth			P35222	bar-1	Q9Y2T1	AXIN2	Mentha	human_orth
								P38646	hsp-6		cdk-2	bioGrid	human_orth			P35222	bar-1	Q92830	baz-2	Mentha	human_orth
								P38646	hsp-6		cdk-9	bioGrid	human_orth			P35222	bar-1	Q92831	baz-2	Mentha	human_orth
								P38646	hsp-6		ced-2	bioGrid	human_orth			P35222	bar-1	P20749	BCL3	Mentha	human_orth
								P38646	hsp-6		cft-1	bioGrid	human_orth			P35222	bar-1	P41182	BCL6	Mentha	human_orth
								P38646	hsp-6		chn-1	bioGrid	human_orth			P35222	bar-1	A1Z199	BCR	Mentha	human_orth
								P38646	hsp-6		clp-1	bioGrid	human_orth			P35222	bar-1	Q9BRQ0	C02B10.5	Mentha	human_orth
								P38646	hsp-6		cox-5A	bioGrid	human_orth			P35222	bar-1	P57076	C21ORF59	Mentha	human_orth
								P38646	hsp-6		cri-3	bioGrid	human_orth			P35222	bar-1	Q9BWV1	C27B7.7	Mentha	human_orth
								P38646	hsp-6		csk-1	bioGrid	human_orth			P35222	bar-1	Q4KMG0	C27B7.7	Mentha	human_orth
								P38646	hsp-6		csn-5	bioGrid	human_orth			P35222	bar-1	Q9C0B0	C34D10.2	Mentha	human_orth
								P38646	hsp-6		csn-6	bioGrid	human_orth			P35222	bar-1	O94972	C34F11.1	Mentha	human_orth
								P38646	hsp-6		cul-2	bioGrid	human_orth			P35222	bar-1	O75147	C34F6.10	Mentha	human_orth
								P38646	hsp-6		cul-3	bioGrid	human_orth			P35222	bar-1	P05387	C37A2.7	Mentha	human_orth
								P38646	hsp-6		cul-4	bioGrid	human_orth			P35222	bar-1	O14907	C45G9.7	Mentha	human_orth
								P38646	hsp-6		cul-5	bioGrid	human_orth			P35222	bar-1	Q9HB71	CACYBP	Mentha	human_orth
								P38646	hsp-6		cul-5	bioGrid	human_orth			P35222	bar-1	Q16790	cah-1	Mentha	human_orth
								P38646	hsp-6		cul-6	bioGrid	human_orth			P35222	bar-1	Q86X55	CARM1	Mentha	human_orth
								P38646	hsp-6		cyd-1	bioGrid	human_orth			P35222	bar-1	Q13033	cash-1	Mentha	human_orth
								P38646	hsp-6		cyld-1	bioGrid	human_orth			P35222	bar-1	Q03135	cav-2	Mentha	human_orth
								P38646	hsp-6		daf-12	bioGrid	human_orth			P35222	bar-1	Q92793	cbp-2	Mentha	human_orth
								P38646	hsp-6		daf-21	bioGrid	human_orth			P35222	bar-1	Q09472	cbp-2	Mentha	human_orth
								P38646	hsp-6		dcn-1	bioGrid	human_orth			P35222	bar-1	Q9Y3M2	CBY1	Mentha	human_orth
								P38646	hsp-6		deb-1	bioGrid	human_orth			P35222	bar-1	Q9H0W5	CCDC8	Mentha	human_orth
								P38646	hsp-6		dnj-1	bioGrid	human_orth			P35222	bar-1	Q96B97	cdap-2	Mentha	human_orth
								P38646	hsp-6		dnj-1	bioGrid	human_orth			P35222	bar-1	Q6P1J9	cdc-73	Mentha	human_orth
								P38646	hsp-6		dnj-1	bioGrid	human_orth			P35222	bar-1	Q9Y6N8	CDH10	Mentha	human_orth
								P38646	hsp-6		dnj-12	bioGrid	human_orth			P35222	bar-1	P55287	CDH11	Mentha	human_orth
								P38646	hsp-6		dnj-12	bioGrid	human_orth			P35222	bar-1	Q13634	CDH18	Mentha	human_orth
								P38646	hsp-6		dnj-13	bioGrid	human_orth			P35222	bar-1	P19022	CDH2	Mentha	human_orth
								P38646	hsp-6		dnj-19	bioGrid	human_orth			P35222	bar-1	P22223	CDH3	Mentha	human_orth
								P38646	hsp-6		dnj-21	bioGrid	human_orth			P35222	bar-1	P33151	CDH5	Mentha	human_orth
								P38646	hsp-6		dnj-22	bioGrid	human_orth			P35222	bar-1	P55285	CDH6	Mentha	human_orth
								P38646	hsp-6		dnj-23	bioGrid	human_orth			P35222	bar-1	Q9ULB5	CDH7	Mentha	human_orth
								P38646	hsp-6		dnj-30	bioGrid	human_orth			P35222	bar-1	P55286	CDH8	Mentha	human_orth
								P38646	hsp-6		dnj-7	bioGrid	human_orth			P35222	bar-1	Q9ULB4	CDH9	Mentha	human_orth
								P38646	hsp-6		dpy-23	bioGrid	human_orth			P35222	bar-1	P24941	cdk-2	Mentha	human_orth
								P38646	hsp-6		dut-1	bioGrid	human_orth			P35222	bar-1	Q00534	cdk-4	Mentha	human_orth
								P38646	hsp-6		dvc-1	bioGrid	human_orth			P35222	bar-1	Q15078	cdka-1	Mentha	human_orth
								P38646	hsp-6		dyf-11	bioGrid	human_orth			P35222	bar-1	Q15583	ceh-60	Mentha	human_orth
								P38646	hsp-6		ech-1.1	bioGrid	human_orth			P35222	bar-1	Q6ZU80	CEP128	Mentha	human_orth
								P38646	hsp-6		ech-7	bioGrid	human_orth			P35222	bar-1	Q9HCK8	chd-7	Mentha	human_orth
								P38646	hsp-6		eef-1A.2	bioGrid	human_orth			P35222	bar-1	Q99966	CITED1	Mentha	human_orth
								P38646	hsp-6		eftu-2	bioGrid	human_orth			P35222	bar-1	P09496	clic-1	Mentha	human_orth
								P38646	hsp-6		ehs-1	bioGrid	human_orth			P35222	bar-1	P08575	clr-1	Mentha	human_orth
								P38646	hsp-6		eif-6	bioGrid	human_orth			P35222	bar-1	P15941	cnp-2	Mentha	human_orth
								P38646	hsp-6		emb-5	bioGrid	human_orth			P35222	bar-1	Q99627	COPS8	Mentha	human_orth
								P38646	hsp-6		enol-1	bioGrid	human_orth			P35222	bar-1	Q92905	csn-5	Mentha	human_orth
								P38646	hsp-6		F08H9.4	bioGrid	human_orth			P35222	bar-1	P42574	csp-3	Mentha	human_orth
								P38646	hsp-6		F10B5.2	bioGrid	human_orth			P35222	bar-1	Q13043	cst-2	Mentha	human_orth
								P38646	hsp-6		F15C11.2	bioGrid	human_orth			P35222	bar-1	Q13363	ctbp-1	Mentha	human_orth
								P38646	hsp-6		F32B4.5	bioGrid	human_orth			P35222	bar-1	Q13618	cul-3	Mentha	human_orth
								P38646	hsp-6		F32D8.4	bioGrid	human_orth			P35222	bar-1	Q13619	cul-4	Mentha	human_orth
								P38646	hsp-6		F33D11.10	bioGrid	human_orth			P35222	bar-1	Q13616	cul-6	Mentha	human_orth
								P38646	hsp-6		F42A6.5	bioGrid	human_orth			P35222	bar-1	P20248	cyb-2.1	Mentha	human_orth
								P38646	hsp-6		F53A3.7	bioGrid	human_orth			P35222	bar-1	P24864	cye-1	Mentha	human_orth
								P38646	hsp-6		F54A3.2	bioGrid	human_orth			P35222	bar-1	Q969T9	D2013.6	Mentha	human_orth
								P38646	hsp-6		F54F2.9	bioGrid	human_orth			P35222	bar-1	Q13485	daf-14	Mentha	human_orth
								P38646	hsp-6		fndc-1	bioGrid	human_orth			P35222	bar-1	O15105	daf-14	Mentha	human_orth
								P38646	hsp-6		ftt-2	bioGrid	human_orth			P35222	bar-1	O43524	daf-16	Mentha	human_orth
								P38646	hsp-6		fust-1	bioGrid	human_orth			P35222	bar-1	P98177	daf-16	Mentha	human_orth
								P38646	hsp-6		fzy-1	bioGrid	human_orth			P35222	bar-1	P08069	daf-2	Mentha	human_orth
								P38646	hsp-6		gem-4	bioGrid	human_orth			P35222	bar-1	P08238	daf-21	Mentha	human_orth
								P38646	hsp-6		gop-2	bioGrid	human_orth			P35222	bar-1	P37173	daf-4	Mentha	human_orth
								P38646	hsp-6		gpd-1	bioGrid	human_orth			P35222	bar-1	Q16531	ddb-1	Mentha	human_orth
								P38646	hsp-6		gpn-1	bioGrid	human_orth			P35222	bar-1	Q13308	ddr-1	Mentha	human_orth
								P38646	hsp-6		gpx-3	bioGrid	human_orth			P35222	bar-1	Q92499	DDX1	Mentha	human_orth
								P38646	hsp-6		gspd-1	bioGrid	human_orth			P35222	bar-1	P18206	deb-1	Mentha	human_orth
								P38646	hsp-6		gtbp-1	bioGrid	human_orth			P35222	bar-1	P23467	dep-1	Mentha	human_orth
								P38646	hsp-6		hap-1	bioGrid	human_orth			P35222	bar-1	Q16827	dep-1	Mentha	human_orth
								P38646	hsp-6		hbl-1	bioGrid	human_orth			P35222	bar-1	O94907	DKK1	Mentha	human_orth
								P38646	hsp-6		hda-4	bioGrid	human_orth			P35222	bar-1	O75937	dnj-30	Mentha	human_orth
								P38646	hsp-6		hda-6	bioGrid	human_orth			P35222	bar-1	P26358	DNMT1	Mentha	human_orth
								P38646	hsp-6		hrp-1	bioGrid	human_orth			P35222	bar-1	Q8TEK3	dot-1.4	Mentha	human_orth
								P38646	hsp-6		hrpl-1	bioGrid	human_orth			P35222	bar-1	Q96CW1	dpy-23	Mentha	human_orth
								P38646	hsp-6		hsp-1	bioGrid	human_orth			P35222	bar-1	Q14574	DSC3	Mentha	human_orth
								P38646	hsp-6		hsp-110	bioGrid	human_orth			P35222	bar-1	O14640	dsh-2	Mentha	human_orth
								P38646	hsp-6		hsp-110	bioGrid	human_orth			P35222	bar-1	O14641	dsh-2	Mentha	human_orth
								P38646	hsp-6		hsp-110	bioGrid	human_orth			P35222	bar-1	Q92997	dsh-2	Mentha	human_orth
								P38646	hsp-6		hsp-110	bioGrid	human_orth			P35222	bar-1	Q01826	dve-1	Mentha	human_orth
								P38646	hsp-6		hsp-4	bioGrid	human_orth			P35222	bar-1	Q15691	ebp-1	Mentha	human_orth
								P38646	hsp-6		hsp-60	bioGrid	human_orth			P35222	bar-1	Q7Z6Z7	eel-1	Mentha	human_orth
								P38646	hsp-6		ife-1	bioGrid	human_orth			P35222	bar-1	O00716	efl-1	Mentha	human_orth
								P38646	hsp-6		igdb-2	bioGrid	human_orth			P35222	bar-1	P35712	egl-13	Mentha	human_orth
								P38646	hsp-6		irk-1	bioGrid	human_orth			P35222	bar-1	P36402	egl-13	Mentha	human_orth
								P38646	hsp-6		irk-2	bioGrid	human_orth			P35222	bar-1	Q9NQB0	egl-13	Mentha	human_orth
								P38646	hsp-6		K08C9.7	bioGrid	human_orth			P35222	bar-1	P11362	egl-15	Mentha	human_orth
								P38646	hsp-6		K08D12.3	bioGrid	human_orth			P35222	bar-1	P18146	egrh-3	Mentha	human_orth
								P38646	hsp-6		kin-25	bioGrid	human_orth			P35222	bar-1	P50402	EMD	Mentha	human_orth
								P38646	hsp-6		ksr-1	bioGrid	human_orth			P35222	bar-1	P42167	emr-1	Mentha	human_orth
								P38646	hsp-6		ldh-1	bioGrid	human_orth			P35222	bar-1	Q8TDY2	epg-7	Mentha	human_orth
								P38646	hsp-6		ldh-1	bioGrid	human_orth			P35222	bar-1	Q96RT1	ERBB2IP	Mentha	human_orth
								P38646	hsp-6		ldp-1	bioGrid	human_orth			P35222	bar-1	P15311	erm-1	Mentha	human_orth
								P38646	hsp-6		let-23	bioGrid	human_orth			P35222	bar-1	P26038	erm-1	Mentha	human_orth
								P38646	hsp-6		let-418	bioGrid	human_orth			P35222	bar-1	P14921	ets-9	Mentha	human_orth
								P38646	hsp-6		let-502	bioGrid	human_orth			P35222	bar-1	Q15717	exec-7	Mentha	human_orth
								P38646	hsp-6		let-60	bioGrid	human_orth			P35222	bar-1	Q8TAM6	F07C6.4	Mentha	human_orth
								P38646	hsp-6		let-805	bioGrid	human_orth			P35222	bar-1	P02511	F08H9.4	Mentha	human_orth
								P38646	hsp-6		lfi-1	bioGrid	human_orth			P35222	bar-1	P08581	F11E6.8	Mentha	human_orth
								P38646	hsp-6		lin-45	bioGrid	human_orth			P35222	bar-1	P42858	F21G4.6	Mentha	human_orth
								P38646	hsp-6		lsm-8	bioGrid	human_orth			P35222	bar-1	Q719H9	F32B4.5	Mentha	human_orth
								P38646	hsp-6		M04B2.4	bioGrid	human_orth			P35222	bar-1	P38398	F42A6.5	Mentha	human_orth
								P38646	hsp-6		M04F3.4	bioGrid	human_orth			P35222	bar-1	P51668	F52C6.12	Mentha	human_orth
								P38646	hsp-6		mag-1	bioGrid	human_orth			P35222	bar-1	Q9UBS8	F56D2.5	Mentha	human_orth
								P38646	hsp-6		mcm-2	bioGrid	human_orth			P35222	bar-1	O00458	F58B3.6	Mentha	human_orth
								P38646	hsp-6		mcm-5	bioGrid	human_orth			P35222	bar-1	Q15038	F58E10.3	Mentha	human_orth
								P38646	hsp-6		mel-23	bioGrid	human_orth			P35222	bar-1	Q4VCS5	F59C12.3	Mentha	human_orth
								P38646	hsp-6		mes-6	bioGrid	human_orth			P35222	bar-1	O15360	FANCA	Mentha	human_orth
								P38646	hsp-6		mex-6	bioGrid	human_orth			P35222	bar-1	Q00597	FANCC	Mentha	human_orth
								P38646	hsp-6		mfb-1	bioGrid	human_orth			P35222	bar-1	Q9HB96	FANCE	Mentha	human_orth
								P38646	hsp-6		ned-8	bioGrid	human_orth			P35222	bar-1	Q9NPI8	FANCF	Mentha	human_orth
								P38646	hsp-6		nfm-1	bioGrid	human_orth			P35222	bar-1	O15287	FANCG	Mentha	human_orth
								P38646	hsp-6		nhr-41	bioGrid	human_orth			P35222	bar-1	P25445	FAS	Mentha	human_orth
								P38646	hsp-6		nhr-41	bioGrid	human_orth			P35222	bar-1	P46531	fbn-1	Mentha	human_orth
								P38646	hsp-6		nhr-85	bioGrid	human_orth			P35222	bar-1	P49789	FHIT	Mentha	human_orth
								P38646	hsp-6		nhr-91	bioGrid	human_orth			P35222	bar-1	Q08050	fkh-8	Mentha	human_orth
								P38646	hsp-6		nhr-91	bioGrid	human_orth			P35222	bar-1	Q7Z6J6	frm-2	Mentha	human_orth
								P38646	hsp-6		nxf-1	bioGrid	human_orth			P35222	bar-1	Q12923	frm-5	Mentha	human_orth
								P38646	hsp-6		otub-1	bioGrid	human_orth			P35222	bar-1	P0C2W1	fsn-1	Mentha	human_orth
								P38646	hsp-6		panl-2	bioGrid	human_orth			P35222	bar-1	P31947	ftt-2	Mentha	human_orth
								P38646	hsp-6		pas-7	bioGrid	human_orth			P35222	bar-1	P63104	ftt-2	Mentha	human_orth
								P38646	hsp-6		pfas-1	bioGrid	human_orth			P35222	bar-1	P35637	fust-1	Mentha	human_orth
								P38646	hsp-6		phb-1	bioGrid	human_orth			P35222	bar-1	Q9UEW8	gck-3	Mentha	human_orth
								P38646	hsp-6		phb-2	bioGrid	human_orth			P35222	bar-1	Q8TEQ6	GEMIN5	Mentha	human_orth
								P38646	hsp-6		pqn-51	bioGrid	human_orth			P35222	bar-1	Q9BZE0	GLIS2	Mentha	human_orth
								P38646	hsp-6		prdx-3	bioGrid	human_orth			P35222	bar-1	P49840	gsk-3	Mentha	human_orth
								P38646	hsp-6		prp-8	bioGrid	human_orth			P35222	bar-1	P49841	gsk-3	Mentha	human_orth
								P38646	hsp-6		psf-3	bioGrid	human_orth			P35222	bar-1	Q9Y4E8	H34C03.2	Mentha	human_orth
								P38646	hsp-6		ptb-1	bioGrid	human_orth			P35222	bar-1	Q13107	H34C03.2	Mentha	human_orth
								P38646	hsp-6		ptp-2	bioGrid	human_orth			P35222	bar-1	Q13547	hda-4	Mentha	human_orth
								P38646	hsp-6		ptp-3	bioGrid	human_orth			P35222	bar-1	P56524	hda-4	Mentha	human_orth
								P38646	hsp-6		pyr-1	bioGrid	human_orth			P35222	bar-1	Q8WUI4	hda-4	Mentha	human_orth
								P38646	hsp-6		R12G8.1	bioGrid	human_orth			P35222	bar-1	Q9UBN7	hda-6	Mentha	human_orth
								P38646	hsp-6		rab-1	bioGrid	human_orth			P35222	bar-1	O95714	HERC2	Mentha	human_orth
								P38646	hsp-6		rab-7	bioGrid	human_orth			P35222	bar-1	Q9UII4	HERC5	Mentha	human_orth
								P38646	hsp-6		rbm-12	bioGrid	human_orth			P35222	bar-1	Q14526	HIC1	Mentha	human_orth
								P38646	hsp-6		rbx-1	bioGrid	human_orth			P35222	bar-1	Q99814	hif-1	Mentha	human_orth
								P38646	hsp-6		riok-1	bioGrid	human_orth			P35222	bar-1	Q16665	hif-1	Mentha	human_orth
								P38646	hsp-6		rle-1	bioGrid	human_orth			P35222	bar-1	P49773	hint-1	Mentha	human_orth
								P38646	hsp-6		rle-1	bioGrid	human_orth			P35222	bar-1	P16403	HIST1H1C	Mentha	human_orth
								P38646	hsp-6		rme-4	bioGrid	human_orth			P35222	bar-1	P15884	hlh-2	Mentha	human_orth
								P38646	hsp-6		rme-8	bioGrid	human_orth			P35222	bar-1	P26232	hmp-1	Mentha	human_orth
								P38646	hsp-6		rnt-1	bioGrid	human_orth			P35222	bar-1	Q9UI47	hmp-1	Mentha	human_orth
								P38646	hsp-6		rsks-1	bioGrid	human_orth			P35222	bar-1	P14923	hmp-2	Mentha	human_orth
								P38646	hsp-6		rsks-1	bioGrid	human_orth			P35222	bar-1	P09651	hrp-1	Mentha	human_orth
								P38646	hsp-6		sago-2	bioGrid	human_orth			P35222	bar-1	P22626	hrp-1	Mentha	human_orth
								P38646	hsp-6		sdha-2	bioGrid	human_orth			P35222	bar-1	P61978	hrpk-1	Mentha	human_orth
								P38646	hsp-6		sem-5	bioGrid	human_orth			P35222	bar-1	P0DMV8	hsp-1	Mentha	human_orth
								P38646	hsp-6		ser-5	bioGrid	human_orth			P35222	bar-1	P0DMV9	hsp-1	Mentha	human_orth
								P38646	hsp-6		sex-1	bioGrid	human_orth			P35222	bar-1	P11142	hsp-110	Mentha	human_orth
								P38646	hsp-6		shc-1	bioGrid	human_orth			P35222	bar-1	Q13402	hum-2	Mentha	human_orth
								P38646	hsp-6		sir-2.1	bioGrid	human_orth			P35222	bar-1	P20290	icd-1	Mentha	human_orth
								P38646	hsp-6		sir-2.4	bioGrid	human_orth			P35222	bar-1	P07195	idh-1	Mentha	human_orth
								P38646	hsp-6		sli-1	bioGrid	human_orth			P35222	bar-1	P02545	ifa-1	Mentha	human_orth
								P38646	hsp-6		smo-1	bioGrid	human_orth			P35222	bar-1	P20700	ifa-3	Mentha	human_orth
								P38646	hsp-6		snai-1	bioGrid	human_orth			P35222	bar-1	O15111	ikke-1	Mentha	human_orth
								P38646	hsp-6		sod-4	bioGrid	human_orth			P35222	bar-1	O14920	ikke-1	Mentha	human_orth
								P38646	hsp-6		sqd-1	bioGrid	human_orth			P35222	bar-1	O60264	isw-1	Mentha	human_orth
								P38646	hsp-6		stl-1	bioGrid	human_orth			P35222	bar-1	O60716	jac-1	Mentha	human_orth
								P38646	hsp-6		T05H4.4	bioGrid	human_orth			P35222	bar-1	Q99569	jac-1	Mentha	human_orth
								P38646	hsp-6		T20H4.5	bioGrid	human_orth			P35222	bar-1	P45983	jnk-1	Mentha	human_orth
								P38646	hsp-6		tag-175	bioGrid	human_orth			P35222	bar-1	P45984	jnk-1	Mentha	human_orth
								P38646	hsp-6		tax-6	bioGrid	human_orth			P35222	bar-1	P23470	K04D7.4	Mentha	human_orth
								P38646	hsp-6		tbg-1	bioGrid	human_orth			P35222	bar-1	P23471	K04D7.4	Mentha	human_orth
								P38646	hsp-6		tig-3	bioGrid	human_orth			P35222	bar-1	P05161	K08C9.7	Mentha	human_orth
								P38646	hsp-6		tin-44	bioGrid	human_orth			P35222	bar-1	Q8TDN6	K12H4.3	Mentha	human_orth
								P38646	hsp-6		tkt-1	bioGrid	human_orth			P35222	bar-1	P17948	kin-16	Mentha	human_orth
								P38646	hsp-6		tlf-1	bioGrid	human_orth			P35222	bar-1	P49674	kin-20	Mentha	human_orth
								P38646	hsp-6		tpa-1	bioGrid	human_orth			P35222	bar-1	O75564	klf-1	Mentha	human_orth
								P38646	hsp-6		trk-1	bioGrid	human_orth			P35222	bar-1	Q13887	klf-2	Mentha	human_orth
								P38646	hsp-6		ttbk-4	bioGrid	human_orth			P35222	bar-1	Q03164	KMT2A	Mentha	human_orth
								P38646	hsp-6		uaf-1	bioGrid	human_orth			P35222	bar-1	Q6VAB6	ksr-1	Mentha	human_orth
								P38646	hsp-6		ubc-12	bioGrid	human_orth			P35222	bar-1	O00182	lec-6	Mentha	human_orth
								P38646	hsp-6		ubh-2	bioGrid	human_orth			P35222	bar-1	Q8WVC0	leo-1	Mentha	human_orth
								P38646	hsp-6		ubxn-2	bioGrid	human_orth			P35222	bar-1	P00533	let-23	Mentha	human_orth
								P38646	hsp-6		ubxn-3	bioGrid	human_orth			P35222	bar-1	P04626	let-23	Mentha	human_orth
								P38646	hsp-6		unc-112	bioGrid	human_orth			P35222	bar-1	Q14160	let-413	Mentha	human_orth
								P38646	hsp-6		unc-26	bioGrid	human_orth			P35222	bar-1	P62837	let-70	Mentha	human_orth
								P38646	hsp-6		unc-60	bioGrid	human_orth			P35222	bar-1	Q9GZQ8	lgg-2	Mentha	human_orth
								P38646	hsp-6		wah-1	bioGrid	human_orth			P35222	bar-1	Q14192	lim-9	Mentha	human_orth
								P38646	hsp-6		xpo-1	bioGrid	human_orth			P35222	bar-1	P34925	lin-18	Mentha	human_orth
								P38646	hsp-6		Y105E8A.14	bioGrid	human_orth			P35222	bar-1	Q9Y297	lin-23	Mentha	human_orth
								P38646	hsp-6		Y106G6D.5	bioGrid	human_orth			P35222	bar-1	Q9UKB1	lin-23	Mentha	human_orth
								P38646	hsp-6		Y17G7B.18	bioGrid	human_orth			P35222	bar-1	Q99853	lin-31	Mentha	human_orth
								P38646	hsp-6		Y22D7AL.10	bioGrid	human_orth			P35222	bar-1	P55197	lin-49	Mentha	human_orth
								P38646	hsp-6		Y41E3.11	bioGrid	human_orth			P35222	bar-1	Q96JM7	lin-61	Mentha	human_orth
								P38646	hsp-6		Y43F8C.7	bioGrid	human_orth			P35222	bar-1	Q9UBE8	lit-1	Mentha	human_orth
								P38646	hsp-6		Y45F3A.9	bioGrid	human_orth			P35222	bar-1	P11279	lmp-2	Mentha	human_orth
								P38646	hsp-6		Y48B6A.13	bioGrid	human_orth			P35222	bar-1	Q2LD37	lpd-3	Mentha	human_orth
								P38646	hsp-6		Y54G2A.18	bioGrid	human_orth			P35222	bar-1	P98164	lrp-1	Mentha	human_orth
								P38646	hsp-6		Y57A10A.29	bioGrid	human_orth			P35222	bar-1	O75581	lrp-1	Mentha	human_orth
								P38646	hsp-6		Y71F9B.9	bioGrid	human_orth			P35222	bar-1	O60341	lsd-1	Mentha	human_orth
								P38646	hsp-6		Y71H2AM.1	bioGrid	human_orth			P35222	bar-1	Q99593	mab-9	Mentha	human_orth
								P38646	hsp-6		Y73C8B.1	bioGrid	human_orth			P35222	bar-1	Q96QZ7	magi-1	Mentha	human_orth
								P38646	hsp-6		Y95B8A.8	bioGrid	human_orth			P35222	bar-1	Q86UL8	magi-1	Mentha	human_orth
								P38646	hsp-6		ykt-6	bioGrid	human_orth			P35222	bar-1	Q8TDM6	magu-4	Mentha	human_orth
								P38646	hsp-6		ztf-14	bioGrid	human_orth			P35222	bar-1	Q16659	MAPK6	Mentha	human_orth
								P38646	hsp-6		ATP5O	bioGrid	human_orth			P35222	bar-1	P30260	mat-1	Mentha	human_orth
								P38646	hsp-6		GNB2L1	bioGrid	human_orth			P35222	bar-1	Q93009	math-33	Mentha	human_orth
								P38646	hsp-6		H2AFX	bioGrid	human_orth			P35222	bar-1	P49736	mcm-2	Mentha	human_orth
								P38646	hsp-6		ICT1	bioGrid	human_orth			P35222	bar-1	P33993	mcm-7	Mentha	human_orth
								P38646	hsp-6		SPG20	bioGrid	human_orth			P35222	bar-1	Q71U36	mec-12	Mentha	human_orth
								P38646	hsp-6		MINOS1	bioGrid	human_orth			P35222	bar-1	O00255	MEN1	Mentha	human_orth
								P38646	hsp-6		PARK2	bioGrid	human_orth			P35222	bar-1	Q15910	mes-2	Mentha	human_orth
								P38646	hsp-6		nef	bioGrid	human_orth			P35222	bar-1	Q9UKE5	mig-15	Mentha	human_orth
								P38646	hsp-6		HHV8GK18_gp79	bioGrid	human_orth			P35222	bar-1	Q15596	NCOA2	Mentha	human_orth
								P38646	hsp-6		IMA1	bioGrid	human_orth			P35222	bar-1	Q9UKK9	ndx-2	Mentha	human_orth
								P38646	hsp-6		TAE1	bioGrid	human_orth			P35222	bar-1	P51955	NEK2	Mentha	human_orth
								P38646	hsp-6		FAM188B	bioGrid	human_orth			P35222	bar-1	P19838	NFKB1	Mentha	human_orth
								P38646	hsp-6		KIAA1429	bioGrid	human_orth			P35222	bar-1	Q13285	nhr-259	Mentha	human_orth
								P38646	hsp-6		HIV2gp4	bioGrid	human_orth			P35222	bar-1	P41235	nhr-41	Mentha	human_orth
								P38646	hsp-6		ATP5A1	bioGrid	human_orth			P35222	bar-1	P19793	nhr-41	Mentha	human_orth
								P38646	hsp-6		ATP5B	bioGrid	human_orth			P35222	bar-1	P22736	nhr-6	Mentha	human_orth
								P38646	hsp-6		HIST1H4A	bioGrid	human_orth			P35222	bar-1	P03372	nhr-91	Mentha	human_orth
								P10809	hsp-60		AK3	bioGrid	human_orth			P35222	bar-1	Q92731	nhr-91	Mentha	human_orth
								P10809	hsp-60		ATPAF1	bioGrid	human_orth			P35222	bar-1	Q92519	nipi-3	Mentha	human_orth
								P10809	hsp-60		AURKAIP1	bioGrid	human_orth			P35222	bar-1	P29474	NOS3	Mentha	human_orth
								P10809	hsp-60		BAK1	bioGrid	human_orth			P35222	bar-1	P52948	npp-10	Mentha	human_orth
								P10809	hsp-60		C17orf80	bioGrid	human_orth			P35222	bar-1	P37198	npp-11	Mentha	human_orth
								P10809	hsp-60		CEP70	bioGrid	human_orth			P35222	bar-1	P49790	npp-7	Mentha	human_orth
								P10809	hsp-60		COLGALT1	bioGrid	human_orth			P35222	bar-1	P49792	npp-9	Mentha	human_orth
								P10809	hsp-60		COX5B	bioGrid	human_orth			P35222	bar-1	O14745	nrfl-1	Mentha	human_orth
								P10809	hsp-60		DNAJA3	bioGrid	human_orth			P35222	bar-1	Q15599	nrfl-1	Mentha	human_orth
								P10809	hsp-60		ECI1	bioGrid	human_orth			P35222	bar-1	Q9UBU9	nxf-1	Mentha	human_orth
								P10809	hsp-60		HSP90AB1	bioGrid	human_orth			P35222	bar-1	Q8TEW0	par-3	Mentha	human_orth
								P10809	hsp-60		RPAP1	bioGrid	human_orth			P35222	bar-1	O60260	PARK2	Mentha	human_orth
								P10809	hsp-60		MYC	bioGrid	human_orth			P35222	bar-1	P09874	parp-1	Mentha	human_orth
								P10809	hsp-60		CD4	bioGrid	human_orth			P35222	bar-1	Q9UGN5	parp-2	Mentha	human_orth
								P10809	hsp-60		ASB9	bioGrid	human_orth			P35222	bar-1	Q13418	pat-4	Mentha	human_orth
								P10809	hsp-60		CLU	bioGrid	human_orth			P35222	bar-1	P35813	pdp-1	Mentha	human_orth
								P10809	hsp-60		CDH1	bioGrid	human_orth			P35222	bar-1	P16284	PECAM1	Mentha	human_orth
								P10809	hsp-60		NOS2	bioGrid	human_orth			P35222	bar-1	P46940	pes-7	Mentha	human_orth
								P10809	hsp-60		RAD52	bioGrid	human_orth			P35222	bar-1	Q99623	phb-2	Mentha	human_orth
								P10809	hsp-60		BCR	bioGrid	human_orth			P35222	bar-1	Q6IE81	phf-15	Mentha	human_orth
								P10809	hsp-60		FBXO6	bioGrid	human_orth			P35222	bar-1	Q13526	pinn-1	Mentha	human_orth
								P10809	hsp-60		MAPK14	bioGrid	human_orth			P35222	bar-1	P98161	pkd-2	Mentha	human_orth
								P10809	hsp-60		PTMS	bioGrid	human_orth			P35222	bar-1	Q6IQ23	PLEKHA7	Mentha	human_orth
								P10809	hsp-60		C11orf58	bioGrid	human_orth			P35222	bar-1	P53350	plk-1	Mentha	human_orth
								P10809	hsp-60		LGR4	bioGrid	human_orth			P35222	bar-1	P29590	PML	Mentha	human_orth
								P10809	hsp-60		CDC20	bioGrid	human_orth			P35222	bar-1	O00570	pop-1	Mentha	human_orth
								P10809	hsp-60		TUBGCP3	bioGrid	human_orth			P35222	bar-1	Q9HCS4	pop-1	Mentha	human_orth
								P10809	hsp-60		CCDC8	bioGrid	human_orth			P35222	bar-1	Q01860	POU5F1	Mentha	human_orth
								P10809	hsp-60		TRIM63	bioGrid	human_orth			P35222	bar-1	O75360	PROP1	Mentha	human_orth
								P10809	hsp-60		LRRC28	bioGrid	human_orth			P35222	bar-1	O94906	prp-6	Mentha	human_orth
								P10809	hsp-60		FBXO17	bioGrid	human_orth			P35222	bar-1	Q15233	psf-1	Mentha	human_orth
								P10809	hsp-60		OXNAD1	bioGrid	human_orth			P35222	bar-1	O95758	ptb-1	Mentha	human_orth
								P10809	hsp-60		AMBRA1	bioGrid	human_orth			P35222	bar-1	P35354	PTGS2	Mentha	human_orth
								P10809	hsp-60		PREP	bioGrid	human_orth			P35222	bar-1	P21246	PTN	Mentha	human_orth
								P10809	hsp-60		NTRK1	bioGrid	human_orth			P35222	bar-1	Q06124	ptp-2	Mentha	human_orth
								P10809	hsp-60		SCARNA22	bioGrid	human_orth			P35222	bar-1	P10586	ptp-3	Mentha	human_orth
								P10809	hsp-60		DDB2	bioGrid	human_orth			P35222	bar-1	P18031	PTPN1	Mentha	human_orth
								P10809	hsp-60		GBA	bioGrid	human_orth			P35222	bar-1	Q15678	PTPN14	Mentha	human_orth
								P10809	hsp-60		FBXO7	bioGrid	human_orth			P35222	bar-1	Q12913	PTPRJ	Mentha	human_orth
								P10809	hsp-60		BCOR	bioGrid	human_orth			P35222	bar-1	Q92729	PTPRU	Mentha	human_orth
								P10809	hsp-60		RFWD3	bioGrid	human_orth			P35222	bar-1	P49023	pxl-1	Mentha	human_orth
								P10809	hsp-60		CEP170P1	bioGrid	human_orth			P35222	bar-1	P14618	pyk-2	Mentha	human_orth
								P10809	hsp-60		Gnb1	bioGrid	human_orth			P35222	bar-1	Q92930	rab-8	Mentha	human_orth
								P10809	hsp-60		Hax1	bioGrid	human_orth			P35222	bar-1	Q9UI14	RABAC1	Mentha	human_orth
								P10809	hsp-60		GAN	bioGrid	human_orth			P35222	bar-1	Q12967	RALGDS	Mentha	human_orth
								P10809	hsp-60		SKI	bioGrid	human_orth			P35222	bar-1	Q15291	rbbp-5	Mentha	human_orth
								P10809	hsp-60		CRY2	bioGrid	human_orth			P35222	bar-1	P62877	rbx-1	Mentha	human_orth
								P10809	hsp-60		RC3H1	bioGrid	human_orth			P35222	bar-1	O60481	ref-2	Mentha	human_orth
								P10809	hsp-60		GTPBP8	bioGrid	human_orth			P35222	bar-1	Q04206	RELA	Mentha	human_orth
								P10809	hsp-60		DCAF4	bioGrid	human_orth			P35222	bar-1	Q08211	rha-1	Mentha	human_orth
								P10809	hsp-60		TRIM43	bioGrid	human_orth			P35222	bar-1	Q5VTB9	RNF220	Mentha	human_orth
								P10809	hsp-60		TRIB2	bioGrid	human_orth			P35222	bar-1	P78317	RNF4	Mentha	human_orth
								P10809	hsp-60		METTL17	bioGrid	human_orth			P35222	bar-1	Q13761	rnt-1	Mentha	human_orth
								P10809	hsp-60		ALOXE3	bioGrid	human_orth			P35222	bar-1	P46778	rpl-21	Mentha	human_orth
								P10809	hsp-60		RSC1A1	bioGrid	human_orth			P35222	bar-1	P62945	RPL41	Mentha	human_orth
								P10809	hsp-60		FAM107A	bioGrid	human_orth			P35222	bar-1	Q9UNS2	rpn-3	Mentha	human_orth
								P10809	hsp-60		PRNP	bioGrid	human_orth			P35222	bar-1	P08865	rps-0	Mentha	human_orth
								P10809	hsp-60		IFNAR1	bioGrid	human_orth			P35222	bar-1	P31749	rsks-1	Mentha	human_orth
								P10809	hsp-60		RIPK4	bioGrid	human_orth			P35222	bar-1	P38159	rsp-8	Mentha	human_orth
								P10809	hsp-60		PHOSPHO1	bioGrid	human_orth			P35222	bar-1	Q9Y265	ruvb-1	Mentha	human_orth
								P10809	hsp-60		RAD18	bioGrid	human_orth			P35222	bar-1	Q9Y230	ruvb-2	Mentha	human_orth
								P10809	hsp-60		PIH1D1	bioGrid	human_orth			P35222	bar-1	Q15796	sam-2	Mentha	human_orth
								P10809	hsp-60		RNF4	bioGrid	human_orth			P35222	bar-1	P84022	sam-2	Mentha	human_orth
								P10809	hsp-60		RNF31	bioGrid	human_orth			P35222	bar-1	Q5SSQ6	SAPCD1	Mentha	human_orth
								P10809	hsp-60		LARP7	bioGrid	human_orth			P35222	bar-1	Q9Y2U5	sek-1	Mentha	human_orth
								P10809	hsp-60		RNF123	bioGrid	human_orth			P35222	bar-1	Q969H0	sel-10	Mentha	human_orth
								P10809	hsp-60		RECQL4	bioGrid	human_orth			P35222	bar-1	P49768	sel-12	Mentha	human_orth
								P10809	hsp-60		TRMT61B	bioGrid	human_orth			P35222	bar-1	O43463	set-12	Mentha	human_orth
								P10809	hsp-60		KRT17	bioGrid	human_orth			P35222	bar-1	O14686	set-16	Mentha	human_orth
								P10809	hsp-60		METTL14	bioGrid	human_orth			P35222	bar-1	P37231	sex-1	Mentha	human_orth
								P10809	hsp-60		ESR2	bioGrid	human_orth			P35222	bar-1	Q8IUQ4	siah-1	Mentha	human_orth
								P10809	hsp-60		TET2	bioGrid	human_orth			P35222	bar-1	Q96EB6	sir-2.1	Mentha	human_orth
								P10809	hsp-60		LINC01554	bioGrid	human_orth			P35222	bar-1	P63208	skr-20	Mentha	human_orth
								P10809	hsp-60		RAB10	bioGrid	human_orth			P35222	bar-1	Q9NQ25	SLAMF7	Mentha	human_orth
								P10809	hsp-60		KRT31	bioGrid	human_orth			P35222	bar-1	P22681	sli-1	Mentha	human_orth
								P10809	hsp-60		KRT40	bioGrid	human_orth			P35222	bar-1	Q9HCE7	SMURF1	Mentha	human_orth
								P10809	hsp-60		KRTAP10-3	bioGrid	human_orth			P35222	bar-1	P62314	snr-3	Mentha	human_orth
								P10809	hsp-60		KRTAP10-8	bioGrid	human_orth			P35222	bar-1	P48431	sox-2	Mentha	human_orth
								P10809	hsp-60		LAMB1	bioGrid	human_orth			P35222	bar-1	P07947	src-1	Mentha	human_orth
								P10809	hsp-60		LETM1	bioGrid	human_orth			P35222	bar-1	Q96L91	ssl-1	Mentha	human_orth
								P10809	hsp-60		MRPL1	bioGrid	human_orth			P35222	bar-1	P52272	sup-46	Mentha	human_orth
								P10809	hsp-60		MRPL14	bioGrid	human_orth			P35222	bar-1	P51532	swsn-4	Mentha	human_orth
								P10809	hsp-60		MRPL27	bioGrid	human_orth			P35222	bar-1	P50616	T09B4.6	Mentha	human_orth
								P10809	hsp-60		MRPL53	bioGrid	human_orth			P35222	bar-1	Q15262	T13H5.1	Mentha	human_orth
								P10809	hsp-60		MRPS21	bioGrid	human_orth			P35222	bar-1	P39687	T19H12.2	Mentha	human_orth
								P10809	hsp-60		MRPS36	bioGrid	human_orth			P35222	bar-1	Q93008	T24B8.7	Mentha	human_orth
								P10809	hsp-60		MTIF2	bioGrid	human_orth			P35222	bar-1	O75478	TADA2A	Mentha	human_orth
								P10809	hsp-60		NDUFS5	bioGrid	human_orth			P35222	bar-1	O75528	TADA3	Mentha	human_orth
								P10809	hsp-60		NME4	bioGrid	human_orth			P35222	bar-1	Q02952	tag-199	Mentha	human_orth
								P10809	hsp-60		PREPL	bioGrid	human_orth			P35222	bar-1	P60484	tag-83	Mentha	human_orth
								P10809	hsp-60		PTPN2	bioGrid	human_orth			P35222	bar-1	O60907	TBL1X	Mentha	human_orth
								P10809	hsp-60		SLC25A39	bioGrid	human_orth			P35222	bar-1	Q9BZK7	TBL1XR1	Mentha	human_orth
								P10809	hsp-60		SPRYD4	bioGrid	human_orth			P35222	bar-1	Q9UPQ9	TNRC6B	Mentha	human_orth
								P10809	hsp-60		THEM4	bioGrid	human_orth			P35222	bar-1	P11388	top-2	Mentha	human_orth
								P10809	hsp-60		THG1L	bioGrid	human_orth			P35222	bar-1	P17252	tpa-1	Mentha	human_orth
								P10809	hsp-60		abl-1	bioGrid	human_orth			P35222	bar-1	P05129	tpa-1	Mentha	human_orth
								P10809	hsp-60		acs-3	bioGrid	human_orth			P35222	bar-1	Q9BUZ4	trf-1	Mentha	human_orth
								P10809	hsp-60		acs-7	bioGrid	human_orth			P35222	bar-1	Q9UPN9	TRIM33	Mentha	human_orth
								P10809	hsp-60		act-1	bioGrid	human_orth			P35222	bar-1	P04629	trk-1	Mentha	human_orth
								P10809	hsp-60		air-2	bioGrid	human_orth			P35222	bar-1	Q9Y4A5	trr-1	Mentha	human_orth
								P10809	hsp-60		B0281.8	bioGrid	human_orth			P35222	bar-1	P22314	uba-1	Mentha	human_orth
								P10809	hsp-60		B0281.8	bioGrid	human_orth			P35222	bar-1	P63146	ubc-1	Mentha	human_orth
								P10809	hsp-60		bar-1	bioGrid	human_orth			P35222	bar-1	Q712K3	ubc-3	Mentha	human_orth
								P10809	hsp-60		C01G10.8	bioGrid	human_orth			P35222	bar-1	Q05086	UBE3A	Mentha	human_orth
								P10809	hsp-60		C04G2.8	bioGrid	human_orth			P35222	bar-1	P09936	ubh-2	Mentha	human_orth
								P10809	hsp-60		C14C10.4	bioGrid	human_orth			P35222	bar-1	P0CG48	ubq-1	Mentha	human_orth
								P10809	hsp-60		C16C10.1	bioGrid	human_orth			P35222	bar-1	Q9UNN5	ubxn-3	Mentha	human_orth
								P10809	hsp-60		C50B6.9	bioGrid	human_orth			P35222	bar-1	Q03431	ugt-7	Mentha	human_orth
								P10809	hsp-60		C50B8.1	bioGrid	human_orth			P35222	bar-1	Q96PU4	UHRF2	Mentha	human_orth
								P10809	hsp-60		cah-3	bioGrid	human_orth			P35222	bar-1	Q96AC1	unc-112	Mentha	human_orth
								P10809	hsp-60		cdk-2	bioGrid	human_orth			P35222	bar-1	Q99697	unc-30	Mentha	human_orth
								P10809	hsp-60		chd-3	bioGrid	human_orth			P35222	bar-1	Q04724	unc-37	Mentha	human_orth
								P10809	hsp-60		cul-4	bioGrid	human_orth			P35222	bar-1	P29317	vab-1	Mentha	human_orth
								P10809	hsp-60		cyd-1	bioGrid	human_orth			P35222	bar-1	Q9HBM0	VEZT	Mentha	human_orth
								P10809	hsp-60		cyn-1	bioGrid	human_orth			P35222	bar-1	Q8NC51	vig-1	Mentha	human_orth
								P10809	hsp-60		D2045.9	bioGrid	human_orth			P35222	bar-1	O14490	W03A5.4	Mentha	human_orth
								P10809	hsp-60		daf-18	bioGrid	human_orth			P35222	bar-1	O96028	WHSC1	Mentha	human_orth
								P10809	hsp-60		dpy-28	bioGrid	human_orth			P35222	bar-1	Q9NRM7	wts-1	Mentha	human_orth
								P10809	hsp-60		egl-9	bioGrid	human_orth			P35222	bar-1	O14980	xpo-1	Mentha	human_orth
								P10809	hsp-60		ets-5	bioGrid	human_orth			P35222	bar-1	Q9HCE1	Y106G6D.5	Mentha	human_orth
								P10809	hsp-60		F11E6.1	bioGrid	human_orth			P35222	bar-1	Q5VTL8	Y108G3AL.2	Mentha	human_orth
								P10809	hsp-60		F11E6.1	bioGrid	human_orth			P35222	bar-1	Q05209	Y41D4A.5	Mentha	human_orth
								P10809	hsp-60		F15C11.2	bioGrid	human_orth			P35222	bar-1	Q92597	Y48G10A.3	Mentha	human_orth
								P10809	hsp-60		F17E5.2	bioGrid	human_orth			P35222	bar-1	Q9UN36	Y48G10A.3	Mentha	human_orth
								P10809	hsp-60		F27D4.1	bioGrid	human_orth			P35222	bar-1	Q9BVG4	Y54E5A.5	Mentha	human_orth
								P10809	hsp-60		F32A7.4	bioGrid	human_orth			P35222	bar-1	Q14498	Y55F3AM.3	Mentha	human_orth
								P10809	hsp-60		F33D4.5	bioGrid	human_orth			P35222	bar-1	P17844	Y55F3BR.1	Mentha	human_orth
								P10809	hsp-60		F39B2.1	bioGrid	human_orth			P35222	bar-1	P24666	Y94H6A.7	Mentha	human_orth
								P10809	hsp-60		F44E5.4	bioGrid	human_orth			P35222	bar-1	Q9GZV5	yap-1	Mentha	human_orth
								P10809	hsp-60		F46B6.6	bioGrid	human_orth			P35222	bar-1	P46937	yap-1	Mentha	human_orth
								P10809	hsp-60		F47D12.9	bioGrid	human_orth			P35222	bar-1	Q86T24	ZBTB33	Mentha	human_orth
								P10809	hsp-60		F47D12.9	bioGrid	human_orth			P35222	bar-1	Q9P287	ZK1127.4	Mentha	human_orth
								P10809	hsp-60		fshr-1	bioGrid	human_orth			P35222	bar-1	P78396	ZK507.6	Mentha	human_orth
								P10809	hsp-60		fust-1	bioGrid	human_orth			P35222	bar-1	P08047	ztf-14	Mentha	human_orth
								P10809	hsp-60		fzy-1	bioGrid	human_orth			Q18825	bar-1	Q21227	apr-1	bioGrid	direct
								P10809	hsp-60		hel-1	bioGrid	human_orth			Q18825	bar-1	G5EFK4	arf-3	bioGrid	direct
								P10809	hsp-60		hel-1	bioGrid	human_orth			Q18825	bar-1	P58798	arx-6	bioGrid	direct
								P10809	hsp-60		hel-1	bioGrid	human_orth			Q18825	bar-1	Q20053	asb-1	bioGrid	direct
								P10809	hsp-60		hel-1	bioGrid	human_orth			Q18825	bar-1	Q23158	atn-1	bioGrid	direct
								P10809	hsp-60		hel-1	bioGrid	human_orth			Q18825	bar-1	P46561	atp-2	bioGrid	direct
								P10809	hsp-60		hint-1	bioGrid	human_orth			Q18825	bar-1	Q3LRZ3	axl-1	bioGrid	direct
								P10809	hsp-60		hmg-20	bioGrid	human_orth			Q18825	bar-1	P42000	B0280.9	bioGrid	direct
								P10809	hsp-60		hmg-5	bioGrid	human_orth			Q18825	bar-1	Q10950	B0361.6	bioGrid	direct
								P10809	hsp-60		hoe-1	bioGrid	human_orth			Q18825	bar-1	Q17495	B0393.6	bioGrid	direct
								P10809	hsp-60		hrp-1	bioGrid	human_orth			Q18825	bar-1	Q18825	apr-1	bioGrid	direct
								P10809	hsp-60		hrp-1	bioGrid	human_orth			Q18825	bar-1	Q22592	bec-1	bioGrid	direct
								P10809	hsp-60		hrpf-2	bioGrid	human_orth			Q18825	bar-1	Q95QU0	C27F2.10	bioGrid	direct
								P10809	hsp-60		hsp-1	bioGrid	human_orth			Q18825	bar-1	Q18257	C27F2.4	bioGrid	direct
								P10809	hsp-60		hsp-1	bioGrid	human_orth			Q18825	bar-1	Q18421	C34C12.8	bioGrid	direct
								P10809	hsp-60		hsp-3	bioGrid	human_orth			Q18825	bar-1	Q18485	C35D10.5	bioGrid	direct
								P10809	hsp-60		K07E3.4	bioGrid	human_orth			Q18825	bar-1	Q18481	C35D10.8	bioGrid	direct
								P10809	hsp-60		lam-1	bioGrid	human_orth			Q18825	bar-1	Q18493	C36A4.4	bioGrid	direct
								P10809	hsp-60		let-268	bioGrid	human_orth			Q18825	bar-1	P48322	C36E8.1	bioGrid	direct
								P10809	hsp-60		let-60	bioGrid	human_orth			Q18825	bar-1	Q09278	C45G9.5	bioGrid	direct
								P10809	hsp-60		letm-1	bioGrid	human_orth			Q18825	bar-1	Q09252	ccdc-55	bioGrid	direct
								P10809	hsp-60		lin-45	bioGrid	human_orth			Q18825	bar-1	Q95QW4	cdf-1	bioGrid	direct
								P10809	hsp-60		lpl-1	bioGrid	human_orth			Q18825	bar-1	P46551	cdk-12	bioGrid	direct
								P10809	hsp-60		lrk-1	bioGrid	human_orth			Q18825	bar-1	Q18273	ceh-43	bioGrid	direct
								P10809	hsp-60		mars-1	bioGrid	human_orth			Q18825	bar-1	Q9N4L2	ceh-45	bioGrid	direct
								P10809	hsp-60		mec-12	bioGrid	human_orth			Q18825	bar-1	Q9N3Z3	chk-1	bioGrid	direct
								P10809	hsp-60		mel-32	bioGrid	human_orth			Q18825	bar-1		clec-152	bioGrid	direct
								P10809	hsp-60		mig-32	bioGrid	human_orth			Q18825	bar-1	Q95YE9	clk-2	bioGrid	direct
								P10809	hsp-60		mrpl-10	bioGrid	human_orth			Q18825	bar-1	Q9N3D7	col-48	bioGrid	direct
								P10809	hsp-60		mrpl-53	bioGrid	human_orth			Q18825	bar-1	P55216	cth-2	bioGrid	direct
								P10809	hsp-60		mrps-18B	bioGrid	human_orth			Q18825	bar-1	Q18853	cyc-1	bioGrid	direct
								P10809	hsp-60		mrps-18B	bioGrid	human_orth			Q18825	bar-1	O01501	cye-1	bioGrid	direct
								P10809	hsp-60		mrps-18B	bioGrid	human_orth			Q18825	bar-1	O16850	daf-16	bioGrid	direct
								P10809	hsp-60		mrps-18B	bioGrid	human_orth			Q18825	bar-1	Q968Y9	daf-2	bioGrid	direct
								P10809	hsp-60		mrps-6	bioGrid	human_orth			Q18825	bar-1	Q9U3C8	dcn-1	bioGrid	direct
								P10809	hsp-60		nhr-91	bioGrid	human_orth			Q18825	bar-1	Q9TXI3	did-2	bioGrid	direct
								P10809	hsp-60		nhr-91	bioGrid	human_orth			Q18825	bar-1	Q20497	dpy-22	bioGrid	direct
								P10809	hsp-60		nipi-3	bioGrid	human_orth			Q18825	bar-1	P48996	dpy-27	bioGrid	direct
								P10809	hsp-60		pmk-1	bioGrid	human_orth			Q18825	bar-1	Q18239	dsh-2	bioGrid	direct
								P10809	hsp-60		ptp-2	bioGrid	human_orth			Q18825	bar-1	Q20971	dsl-5	bioGrid	direct
								P10809	hsp-60		rab-1	bioGrid	human_orth			Q18825	bar-1	Q20852	egas-4	bioGrid	direct
								P10809	hsp-60		rab-5	bioGrid	human_orth			Q18825	bar-1	Q10656	egl-15	bioGrid	direct
								P10809	hsp-60		rgs-1	bioGrid	human_orth			Q18825	bar-1	G5EGF4	egl-18	bioGrid	direct
								P10809	hsp-60		rle-1	bioGrid	human_orth			Q18825	bar-1	P34703	emb-5	bioGrid	direct
								P10809	hsp-60		scd-2	bioGrid	human_orth			Q18825	bar-1	Q09590	emb-8	bioGrid	direct
								P10809	hsp-60		sek-1	bioGrid	human_orth			Q18825	bar-1	G5EEV6	epi-1	bioGrid	direct
								P10809	hsp-60		ska-1	bioGrid	human_orth			Q18825	bar-1	G5EC05	evl-14	bioGrid	direct
								P10809	hsp-60		spds-1	bioGrid	human_orth			Q18825	bar-1	Q20051	F35G12.7	bioGrid	direct
								P10809	hsp-60		spg-7	bioGrid	human_orth			Q18825	bar-1	Q20124	F37C12.1	bioGrid	direct
								P10809	hsp-60		T04C9.1	bioGrid	human_orth			Q18825	bar-1	Q5FC73	F54D5.5	bioGrid	direct
								P10809	hsp-60		T09F3.2	bioGrid	human_orth			Q18825	bar-1	Q20865	F56C9.7	bioGrid	direct
								P10809	hsp-60		T14B4.2	bioGrid	human_orth			Q18825	bar-1	P17221	fem-1	bioGrid	direct
								P10809	hsp-60		T25B9.1	bioGrid	human_orth			Q18825	bar-1	Q19802	fkh-5	bioGrid	direct
								P10809	hsp-60		tars-1	bioGrid	human_orth			Q18825	bar-1	Q9TYS3	ftn-2	bioGrid	direct
								P10809	hsp-60		tbg-1	bioGrid	human_orth			Q18825	bar-1	Q20655	ftt-2	bioGrid	direct
								P10809	hsp-60		trm-1	bioGrid	human_orth			Q18825	bar-1	O17214	fum-1	bioGrid	direct
								P10809	hsp-60		ubc-12	bioGrid	human_orth			Q18825	bar-1	Q17339	gld-1	bioGrid	direct
								P10809	hsp-60		vars-2	bioGrid	human_orth			Q18825	bar-1	P34689	glh-1	bioGrid	direct
								P10809	hsp-60		vars-2	bioGrid	human_orth			Q18825	bar-1	P13508	glp-1	bioGrid	direct
								P10809	hsp-60		vars-2	bioGrid	human_orth			Q18825	bar-1	P46576	gop-3	bioGrid	direct
								P10809	hsp-60		W02B12.9	bioGrid	human_orth			Q18825	bar-1	G5EBS1	gro-1	bioGrid	direct
								P10809	hsp-60		W04A8.1	bioGrid	human_orth			Q18825	bar-1	Q22843	grsp-2	bioGrid	direct
								P10809	hsp-60		W07A12.4	bioGrid	human_orth			Q18825	bar-1	Q9U2Q9	gsk-3	bioGrid	direct
								P10809	hsp-60		wdr-5.2	bioGrid	human_orth			Q18825	bar-1	O76672	H34I24.2	bioGrid	direct
								P10809	hsp-60		Y37B11A.3	bioGrid	human_orth			Q18825	bar-1	O17695	hda-1	bioGrid	direct
								P10809	hsp-60		ZK1058.5	bioGrid	human_orth			Q18825	bar-1	Q17796	hgrs-1	bioGrid	direct
								P10809	hsp-60		ZK550.3	bioGrid	human_orth			Q18825	bar-1	P08898	his-2	bioGrid	direct
								P10809	hsp-60		ZK673.2	bioGrid	human_orth			Q18825	bar-1	Q27489	his-69	bioGrid	direct
								P10809	hsp-60		ZK688.3	bioGrid	human_orth			Q18825	bar-1	Q27894	his-8	bioGrid	direct
								P10809	hsp-60		AASS	bioGrid	human_orth			Q18825	bar-1	Q09390	hmg-1.2	bioGrid	direct
								P10809	hsp-60		ACAA2	bioGrid	human_orth			Q18825	bar-1	P41848	hmg-4	bioGrid	direct
								P10809	hsp-60		ECI2	bioGrid	human_orth			Q18825	bar-1	Q19207	hmgr-1	bioGrid	direct
								P10809	hsp-60		ACADVL	bioGrid	human_orth			Q18825	bar-1	O44326	hmp-2	bioGrid	direct
								P10809	hsp-60		TAZ	bioGrid	human_orth			Q18825	bar-1	G5EFT5	hsf-1	bioGrid	direct
								P10809	hsp-60		ACO2	bioGrid	human_orth			Q18825	bar-1	Q18885	icd-1	bioGrid	direct
								P10809	hsp-60		ACAD9	bioGrid	human_orth			Q18825	bar-1	G5EFH1	ins-17	bioGrid	direct
								P10809	hsp-60		ACADM	bioGrid	human_orth			Q18825	bar-1	Q9Y0A1	itr-1	bioGrid	direct
								P10809	hsp-60		ACADSB	bioGrid	human_orth			Q18825	bar-1	Q21234	K04G7.1	bioGrid	direct
								P10809	hsp-60		ACSF3	bioGrid	human_orth			Q18825	bar-1	P28548	kin-10	bioGrid	direct
								P10809	hsp-60		ARNT	bioGrid	human_orth			Q18825	bar-1	G5EFD2	ksr-1	bioGrid	direct
								P10809	hsp-60		AURKB	bioGrid	human_orth			Q18825	bar-1	G5EDU7	lag-1	bioGrid	direct
								P10809	hsp-60		ALDOA	bioGrid	human_orth			Q18825	bar-1	Q18823	lam-2	bioGrid	direct
								P10809	hsp-60		ALDH2	bioGrid	human_orth			Q18825	bar-1	G5ECE3	lam-3	bioGrid	direct
								P10809	hsp-60		ALDH18A1	bioGrid	human_orth			Q18825	bar-1	Q09996	lars-1	bioGrid	direct
								P10809	hsp-60		ALDH1B1	bioGrid	human_orth			Q18825	bar-1	P92199	let-502	bioGrid	direct
								P10809	hsp-60		APP	bioGrid	human_orth			Q18825	bar-1	P22981	let-60	bioGrid	direct
								P10809	hsp-60		HSD17B10	bioGrid	human_orth			Q18825	bar-1	Q11184	let-756	bioGrid	direct
								P10809	hsp-60		ATAD3B	bioGrid	human_orth			Q18825	bar-1	Q09990	lin-23	bioGrid	direct
								P10809	hsp-60		ATF2	bioGrid	human_orth			Q18825	bar-1	G5EGB2	lin-29	bioGrid	direct
								P10809	hsp-60		ATG16L1	bioGrid	human_orth			Q18825	bar-1	Q03345	lin-3	bioGrid	direct
								P10809	hsp-60		LYPLAL1	bioGrid	human_orth			Q18825	bar-1	G5EDT1	lin-35	bioGrid	direct
								P10809	hsp-60		ATXN3	bioGrid	human_orth			Q18825	bar-1	A5PEX5	lin-7	bioGrid	direct
								P10809	hsp-60		NDUFAF4	bioGrid	human_orth			Q18825	bar-1	Q04833	lrp-1	bioGrid	direct
								P10809	hsp-60		NFS1	bioGrid	human_orth			Q18825	bar-1	Q21452	M01F1.3	bioGrid	direct
								P10809	hsp-60		HADHB	bioGrid	human_orth			Q18825	bar-1	G5EFM0	mdf-1	bioGrid	direct
								P10809	hsp-60		BCAT2	bioGrid	human_orth			Q18825	bar-1	Q21127	meg-2	bioGrid	direct
								P10809	hsp-60		BCKDHA	bioGrid	human_orth			Q18825	bar-1	O44740	mei-2	bioGrid	direct
								P10809	hsp-60		BCKDHB	bioGrid	human_orth			Q18825	bar-1	G5EEB3	mel-11	bioGrid	direct
								P10809	hsp-60		BCS1L	bioGrid	human_orth			Q18825	bar-1	G5EBL2	mes-1	bioGrid	direct
								P10809	hsp-60		PNPT1	bioGrid	human_orth			Q18825	bar-1	Q9XUB2	mex-5	bioGrid	direct
								P10809	hsp-60		GLB1L3	bioGrid	human_orth			Q18825	bar-1	P41846	mml-1	bioGrid	direct
								P10809	hsp-60		BICD2	bioGrid	human_orth			Q18825	bar-1	O45244	mog-4	bioGrid	direct
								P10809	hsp-60		PRDM1	bioGrid	human_orth			Q18825	bar-1	Q09530	mog-5	bioGrid	direct
								P10809	hsp-60		OXCT1	bioGrid	human_orth			Q18825	bar-1	Q22329	mom-1	bioGrid	direct
								P10809	hsp-60		OXCT2	bioGrid	human_orth			Q18825	bar-1	Q10459	mom-2	bioGrid	direct
								P10809	hsp-60		REXO2	bioGrid	human_orth			Q18825	bar-1	A0A0K3AWM6	mom-5	bioGrid	direct
								P10809	hsp-60		SUPV3L1	bioGrid	human_orth			Q18825	bar-1	Q23243	morc-1	bioGrid	direct
								P10809	hsp-60		TMCC2	bioGrid	human_orth			Q18825	bar-1	P39745	mpk-1	bioGrid	direct
								P10809	hsp-60		C12orf10	bioGrid	human_orth			Q18825	bar-1	Q22140	mrpl-16	bioGrid	direct
								P10809	hsp-60		MGME1	bioGrid	human_orth			Q18825	bar-1	Q6A575	mrpl-21	bioGrid	direct
								P10809	hsp-60		TTC39B	bioGrid	human_orth			Q18825	bar-1	Q21601	mrps-34	bioGrid	direct
								P10809	hsp-60		NDUFA5	bioGrid	human_orth			Q18825	bar-1	P34576	mua-3	bioGrid	direct
								P10809	hsp-60		NDUFA13	bioGrid	human_orth			Q18825	bar-1	Q21281	mup-4	bioGrid	direct
								P10809	hsp-60		UNK	bioGrid	human_orth			Q18825	bar-1	Q9TYU5	mys-1	bioGrid	direct
								P10809	hsp-60		OBSL1	bioGrid	human_orth			Q18825	bar-1	G5EF61	ndg-4	bioGrid	direct
								P10809	hsp-60		UQCC1	bioGrid	human_orth			Q18825	bar-1	Q23489	nhr-9	bioGrid	direct
								P10809	hsp-60		GATB	bioGrid	human_orth			Q18825	bar-1	G5EED4	nipi-3	bioGrid	direct
								P10809	hsp-60		MTERF3	bioGrid	human_orth			Q18825	bar-1	Q18224	ntl-9	bioGrid	direct
								P10809	hsp-60		ZNF598	bioGrid	human_orth			Q18825	bar-1	O18236	nuo-3	bioGrid	direct
								P10809	hsp-60		TRMT5	bioGrid	human_orth			Q18825	bar-1	Q9N4Y8	nuo-5	bioGrid	direct
								P10809	hsp-60		CAND1	bioGrid	human_orth			Q18825	bar-1	Q23098	nuo-6	bioGrid	direct
								P10809	hsp-60		STRN4	bioGrid	human_orth			Q18825	bar-1	O18158	ogt-1	bioGrid	direct
								P10809	hsp-60		CCAR2	bioGrid	human_orth			Q18825	bar-1	P34766	pal-1	bioGrid	direct
								P10809	hsp-60		VCP	bioGrid	human_orth			Q18825	bar-1	Q9U3A0	pan-1	bioGrid	direct
								P10809	hsp-60		CDC5L	bioGrid	human_orth			Q18825	bar-1	H2L089	par-2	bioGrid	direct
								P10809	hsp-60		CDC73	bioGrid	human_orth			Q18825	bar-1	P41932	par-5	bioGrid	direct
								P10809	hsp-60		CDK9	bioGrid	human_orth			Q18825	bar-1	Q9NAN2	par-6	bioGrid	direct
								P10809	hsp-60		BAX	bioGrid	human_orth			Q18825	bar-1	Q27874	pat-3	bioGrid	direct
								P10809	hsp-60		BCL2L1	bioGrid	human_orth			Q18825	bar-1	G5ED66	pax-3	bioGrid	direct
								P10809	hsp-60		CFTR	bioGrid	human_orth			Q18825	bar-1	Q09345	pcf-11	bioGrid	direct
								P10809	hsp-60		STUB1	bioGrid	human_orth			Q18825	bar-1	Q17770	pdi-2	bioGrid	direct
								P10809	hsp-60		CLEC7A	bioGrid	human_orth			Q18825	bar-1	Q17381	pha-4	bioGrid	direct
								P10809	hsp-60		CLPP	bioGrid	human_orth			Q18825	bar-1	Q94131	pie-1	bioGrid	direct
								P10809	hsp-60		SAMD3	bioGrid	human_orth			Q18825	bar-1	G5EFI8	plc-1	bioGrid	direct
								P10809	hsp-60		COX4I1	bioGrid	human_orth			Q18825	bar-1	Q3V5K0	plx-1	bioGrid	direct
								P10809	hsp-60		GDA	bioGrid	human_orth			Q18825	bar-1	H2KYP7	pnk-1	bioGrid	direct
								P10809	hsp-60		C1QBP	bioGrid	human_orth			Q18825	bar-1	Q10666	pop-1	bioGrid	direct
								P10809	hsp-60		ERCC8	bioGrid	human_orth			Q18825	bar-1	G5EF15	pos-1	bioGrid	direct
								P10809	hsp-60		COPS5	bioGrid	human_orth			Q18825	bar-1	Q9U207	pqn-87	bioGrid	direct
								P10809	hsp-60		CASP3	bioGrid	human_orth			Q18825	bar-1	Q18426	prx-5	bioGrid	direct
								P10809	hsp-60		CS	bioGrid	human_orth			Q18825	bar-1	O62090	pry-1	bioGrid	direct
								P10809	hsp-60		CUL2	bioGrid	human_orth			Q18825	bar-1	Q21649	R02F2.7	bioGrid	direct
								P10809	hsp-60		CUL3	bioGrid	human_orth			Q18825	bar-1	Q21821	R07E5.7	bioGrid	direct
								P10809	hsp-60		CUL4B	bioGrid	human_orth			Q18825	bar-1	Q21905	R10E4.9	bioGrid	direct
								P10809	hsp-60		CUL1	bioGrid	human_orth			Q18825	bar-1	O44191	rme-2	bioGrid	direct
								P10809	hsp-60		CYLD	bioGrid	human_orth			Q18825	bar-1	Q21832	rnp-4	bioGrid	direct
								P10809	hsp-60		PPIE	bioGrid	human_orth			Q18825	bar-1	P42170	rnr-2	bioGrid	direct
								P10809	hsp-60		THNSL1	bioGrid	human_orth			Q18825	bar-1	Q19826	rpb-8	bioGrid	direct
								P10809	hsp-60		CLPX	bioGrid	human_orth			Q18825	bar-1	Q27492	rpc-2	bioGrid	direct
								P10809	hsp-60		MTHFD2	bioGrid	human_orth			Q18825	bar-1	P46769	rps-0	bioGrid	direct
								P10809	hsp-60		DAP3	bioGrid	human_orth			Q18825	bar-1	P49196	rps-12	bioGrid	direct
								P10809	hsp-60		DARS2	bioGrid	human_orth			Q18825	bar-1	P49197	rps-21	bioGrid	direct
								P10809	hsp-60		DDX17	bioGrid	human_orth			Q18825	bar-1	Q09260	sel-8	bioGrid	direct
								P10809	hsp-60		DHFR	bioGrid	human_orth			Q18825	bar-1	P29355	sem-5	bioGrid	direct
								P10809	hsp-60		HSD17B4	bioGrid	human_orth			Q18825	bar-1	P41830	sex-1	bioGrid	direct
								P10809	hsp-60		DLAT	bioGrid	human_orth			Q18825	bar-1	Q09488	sma-6	bioGrid	direct
								P10809	hsp-60		DLST	bioGrid	human_orth			Q18825	bar-1	Q20060	smc-4	bioGrid	direct
								P10809	hsp-60		DUT	bioGrid	human_orth			Q18825	bar-1	P55853	smo-1	bioGrid	direct
								P10809	hsp-60		HADHA	bioGrid	human_orth			Q18825	bar-1	Q21831	snfc-5	bioGrid	direct
								P10809	hsp-60		ECHS1	bioGrid	human_orth			Q18825	bar-1	Q22875	soc-2	bioGrid	direct
								P10809	hsp-60		HADH	bioGrid	human_orth			Q18825	bar-1	Q9N5D3	sos-1	bioGrid	direct
								P10809	hsp-60		EEF1B2	bioGrid	human_orth			Q18825	bar-1	P91870	spd-2	bioGrid	direct
								P10809	hsp-60		EEF2	bioGrid	human_orth			Q18825	bar-1	G5EF02	spn-4	bioGrid	direct
								P10809	hsp-60		HUWE1	bioGrid	human_orth			Q18825	bar-1	G5EDR3	sur-6	bioGrid	direct
								P10809	hsp-60		EFTUD2	bioGrid	human_orth			Q18825	bar-1	Q9XVI2	sys-1	bioGrid	direct
								P10809	hsp-60		SUPT6H	bioGrid	human_orth			Q18825	bar-1	Q9N537	szy-2	bioGrid	direct
								P10809	hsp-60		TMPO	bioGrid	human_orth			Q18825	bar-1	Q9N5E4	T02H6.11	bioGrid	direct
								P10809	hsp-60		ERAL1	bioGrid	human_orth			Q18825	bar-1	Q22137	T04A8.7	bioGrid	direct
								P10809	hsp-60		MCCC2	bioGrid	human_orth			Q18825	bar-1	G5EBK0	T08A11.1	bioGrid	direct
								P10809	hsp-60		AAR2	bioGrid	human_orth			Q18825	bar-1	P41843	T20B12.3	bioGrid	direct
								P10809	hsp-60		AK4	bioGrid	human_orth			Q18825	bar-1	P41847	T20B12.7	bioGrid	direct
								P10809	hsp-60		CTSH	bioGrid	human_orth			Q18825	bar-1	Q22619	T20H4.5	bioGrid	direct
								P10809	hsp-60		HSDL2	bioGrid	human_orth			Q18825	bar-1	P52275	tbb-2	bioGrid	direct
								P10809	hsp-60		ETFB	bioGrid	human_orth			Q18825	bar-1	P32085	tbp-1	bioGrid	direct
								P10809	hsp-60		TMEM70	bioGrid	human_orth			Q18825	bar-1	Q9U1W1	tfg-1	bioGrid	direct
								P10809	hsp-60		LZTS2	bioGrid	human_orth			Q18825	bar-1	Q22093	tftc-5	bioGrid	direct
								P10809	hsp-60		IBA57	bioGrid	human_orth			Q18825	bar-1	Q18264	tmem-131	bioGrid	direct
								P10809	hsp-60		BRCA1	bioGrid	human_orth			Q18825	bar-1	Q18490	tost-1	bioGrid	direct
								P10809	hsp-60		SDHB	bioGrid	human_orth			Q18825	bar-1	G5EEV2	trr-1	bioGrid	direct
								P10809	hsp-60		NDUFA7	bioGrid	human_orth			Q18825	bar-1	P0CG71	ubq-1	bioGrid	direct
								P10809	hsp-60		TRMT10C	bioGrid	human_orth			Q18825	bar-1	P98080	ucr-1	bioGrid	direct
								P10809	hsp-60		NOS1AP	bioGrid	human_orth			Q18825	bar-1	Q09353	ulp-1	bioGrid	direct
								P10809	hsp-60		NDUFV2	bioGrid	human_orth			Q18825	bar-1	G5EF96	unc-40	bioGrid	direct
								P10809	hsp-60		Ckap5	bioGrid	human_orth			Q18825	bar-1	Q06561	unc-52	bioGrid	direct
								P10809	hsp-60		ACOT9	bioGrid	human_orth			Q18825	bar-1	B1V8A0	unc-57	bioGrid	direct
								P10809	hsp-60		C8orf82	bioGrid	human_orth			Q18825	bar-1	Q9N5D6	unc-62	bioGrid	direct
								P10809	hsp-60		FLAD1	bioGrid	human_orth			Q18825	bar-1	G5EGG0	uso-1	bioGrid	direct
								P10809	hsp-60		FTL	bioGrid	human_orth			Q18825	bar-1	G5EDN8	vab-19	bioGrid	direct
								P10809	hsp-60		NDUFS2	bioGrid	human_orth			Q18825	bar-1	G5EEK5	vet-6	bioGrid	direct
								P10809	hsp-60		TMLHE	bioGrid	human_orth			Q18825	bar-1	Q9BL60	vps-20	bioGrid	direct
								P10809	hsp-60		GLUD1	bioGrid	human_orth			Q18825	bar-1	Q9NA26	vps-28	bioGrid	direct
								P10809	hsp-60		GFM1	bioGrid	human_orth			Q18825	bar-1	Q18886	vps-32.1	bioGrid	direct
								P10809	hsp-60		GLS	bioGrid	human_orth			Q18825	bar-1	Q9BL83	vps-4	bioGrid	direct
								P10809	hsp-60		GLOD4	bioGrid	human_orth			Q18825	bar-1	O18181	W09D10.1	bioGrid	direct
								P10809	hsp-60		GLRX5	bioGrid	human_orth			Q18825	bar-1	Q20059	wdr-48	bioGrid	direct
								P10809	hsp-60		GAPDH	bioGrid	human_orth			Q18825	bar-1	H2KZ22	wip-1	bioGrid	direct
								P10809	hsp-60		GSR	bioGrid	human_orth			Q18825	bar-1	G5EEZ4	Y44F5A.1	bioGrid	direct
								P10809	hsp-60		GSTK1	bioGrid	human_orth			Q18825	bar-1	Q9TXZ9	ykt-6	bioGrid	direct
								P10809	hsp-60		G3BP1	bioGrid	human_orth			Q18825	bar-1	Q23280	ZC395.10	bioGrid	direct
								P10809	hsp-60		HIBCH	bioGrid	human_orth			Q18825	bar-1	P34604	ZK1098.4	bioGrid	direct
								P10809	hsp-60		HARS2	bioGrid	human_orth			Q18825	bar-1	Q23525	ZK546.14	bioGrid	direct
								P10809	hsp-60		HDAC1	bioGrid	human_orth			Q18825	bar-1	Q9N5V6	ztf-3	bioGrid	direct
								P10809	hsp-60		HDAC5	bioGrid	human_orth			Q18825	bar-1	G5EEM5	zyg-9	bioGrid	direct
								P10809	hsp-60		HDAC4	bioGrid	human_orth			Q18825	bar-1	H2FLG9	grsp-2	IntAct	direct
								P10809	hsp-60		HDAC2	bioGrid	human_orth			Q18825	bar-1	O76672	H34I24.2	IntAct	direct
								P10809	hsp-60		HDAC6	bioGrid	human_orth			Q18825	bar-1	Q21127	meg-2	IntAct	direct
								P10809	hsp-60		AMFR	bioGrid	human_orth			Q18825	bar-1	Q10666	pop-1	IntAct	direct
								P10809	hsp-60		HSPA4	bioGrid	human_orth			Q18825	bar-1	G2HK03	pqn-87	IntAct	direct
								P10809	hsp-60		HSPA8	bioGrid	human_orth			Q18825	bar-1	B1V8A0	unc-57	IntAct	direct
								P10809	hsp-60		HSPA5	bioGrid	human_orth			Q18825	bar-1	O18181	W09D10.1	IntAct	direct
								P10809	hsp-60		HSPA9	bioGrid	human_orth			Q18825	bar-1	B1V8A0	B1V8A0	Mentha	direct
								P10809	hsp-60		HSPD1	bioGrid	human_orth			Q18825	bar-1	Q5FC73	Q5FC73	Mentha	direct
								P10809	hsp-60		IARS2	bioGrid	human_orth			Q18825	bar-1	Q9N4L2	CEH-45	Mentha	direct
								P10809	hsp-60		IDH3B	bioGrid	human_orth			Q18825	bar-1	Q9U1W1	TFG-1	Mentha	direct
								P10809	hsp-60		IDH3G	bioGrid	human_orth			Q18825	bar-1	Q23158	ATN-1	Mentha	direct
								P10809	hsp-60		EIF4E	bioGrid	human_orth			Q18825	bar-1	Q3LRZ3	AXL-1	Mentha	direct
								P10809	hsp-60		EIF5A	bioGrid	human_orth			Q18825	bar-1	Q21127	MEG-2	Mentha	direct
								P10809	hsp-60		VCAM1	bioGrid	human_orth			Q18825	bar-1	Q21227	APR-1	Mentha	direct
								P10809	hsp-60		ITGA1	bioGrid	human_orth			Q18825	bar-1	Q9N5V6	ZTF-3	Mentha	direct
								P10809	hsp-60		NIPSNAP1	bioGrid	human_orth			Q18825	bar-1	P55216	CTH-2	Mentha	direct
								P10809	hsp-60		NIPSNAP3A	bioGrid	human_orth			Q18825	bar-1	O16850	DAF-16	Mentha	direct
								P10809	hsp-60		ISG15	bioGrid	human_orth			Q18825	bar-1	G2HK03	G2HK03	Mentha	direct
								P10809	hsp-60		UBL4A	bioGrid	human_orth			Q18825	bar-1	H2FLG9	H2FLG9	Mentha	direct
								P10809	hsp-60		NDUFAF5	bioGrid	human_orth			Q18825	bar-1	Q09990	LIN-23	Mentha	direct
								P10809	hsp-60		ACAT1	bioGrid	human_orth			Q18825	bar-1	G5ECD7	MEL-11	Mentha	direct
								P10809	hsp-60		CSNK1A1	bioGrid	human_orth			Q18825	bar-1	O18181	O18181	Mentha	direct
								P10809	hsp-60		LARS2	bioGrid	human_orth			Q18825	bar-1	O76672	O76672	Mentha	direct
								P10809	hsp-60		PTCD3	bioGrid	human_orth			Q18825	bar-1	P34604	P34604	Mentha	direct
								P10809	hsp-60		FN1	bioGrid	human_orth			Q18825	bar-1	Q10666	POP-1	Mentha	direct
								P10809	hsp-60		LONP1	bioGrid	human_orth			Q18825	bar-1	O62090	PRY-1	Mentha	direct
								P10809	hsp-60		NDUFS4	bioGrid	human_orth			Q18825	bar-1	P0CG71	UBQ-1	Mentha	direct
								P10809	hsp-60		MTG2	bioGrid	human_orth			Q18825	bar-1	G5EGG0	USO-1	Mentha	direct
								P10809	hsp-60		FOXRED1	bioGrid	human_orth			Q18825	bar-1	G5EEK5	VET-6	Mentha	direct
								P10809	hsp-60		PDPR	bioGrid	human_orth			Q16740	clpp-1	Q9Y697	nfs-1	Mentha	human_orth
								P10809	hsp-60		P4HB	bioGrid	human_orth			Q16740	clpp-1		EGFR	bioGrid	human_orth
								P10809	hsp-60		PDIA3	bioGrid	human_orth			Q16740	clpp-1		FBXO17	bioGrid	human_orth
								P10809	hsp-60		PYCR1	bioGrid	human_orth			Q16740	clpp-1		FBXO17	bioGrid	human_orth
								P10809	hsp-60		PYCR2	bioGrid	human_orth			Q16740	clpp-1		ZNF133	bioGrid	human_orth
								P10809	hsp-60		EDEM3	bioGrid	human_orth			Q16740	clpp-1		IMPDH1	bioGrid	human_orth
								P10809	hsp-60		MCM2	bioGrid	human_orth			Q16740	clpp-1		TRIM43	bioGrid	human_orth
								P10809	hsp-60		MDH2	bioGrid	human_orth			Q16740	clpp-1		SCO1	bioGrid	human_orth
								P10809	hsp-60		ME2	bioGrid	human_orth			Q16740	clpp-1		COX14	bioGrid	human_orth
								P10809	hsp-60		EED	bioGrid	human_orth			Q16740	clpp-1		TRMT61B	bioGrid	human_orth
								P10809	hsp-60		ZFP36L2	bioGrid	human_orth			Q16740	clpp-1		AURKAIP1	bioGrid	human_orth
								P10809	hsp-60		MMAB	bioGrid	human_orth			Q16740	clpp-1		LDHB	bioGrid	human_orth
								P10809	hsp-60		PMPCA	bioGrid	human_orth			Q16740	clpp-1		mel-32	bioGrid	human_orth
								P10809	hsp-60		PMPCB	bioGrid	human_orth			Q16740	clpp-1		GAP43	bioGrid	human_orth
								P10809	hsp-60		MRPL12	bioGrid	human_orth			Q16740	clpp-1		COL6A1	bioGrid	human_orth
								P10809	hsp-60		MRPL13	bioGrid	human_orth			Q16740	clpp-1		COL11A1	bioGrid	human_orth
								P10809	hsp-60		MRPL16	bioGrid	human_orth			Q16740	clpp-1		aha-1	bioGrid	human_orth
								P10809	hsp-60		MRPL19	bioGrid	human_orth			Q16740	clpp-1		aha-1	bioGrid	human_orth
								P10809	hsp-60		MRPL20	bioGrid	human_orth			Q16740	clpp-1		C35A11.4	bioGrid	human_orth
								P10809	hsp-60		MRPL21	bioGrid	human_orth			Q16740	clpp-1		C35D10.5	bioGrid	human_orth
								P10809	hsp-60		MRPL24	bioGrid	human_orth			Q16740	clpp-1		calu-2	bioGrid	human_orth
								P10809	hsp-60		MRPL43	bioGrid	human_orth			Q16740	clpp-1		D2030.2	bioGrid	human_orth
								P10809	hsp-60		MRPL37	bioGrid	human_orth			Q16740	clpp-1		ech-1.1	bioGrid	human_orth
								P10809	hsp-60		MRPL38	bioGrid	human_orth			Q16740	clpp-1		fdps-1	bioGrid	human_orth
								P10809	hsp-60		MRPL39	bioGrid	human_orth			Q16740	clpp-1		hsp-110	bioGrid	human_orth
								P10809	hsp-60		MRPL4	bioGrid	human_orth			Q16740	clpp-1		hsp-60	bioGrid	human_orth
								P10809	hsp-60		MRPL41	bioGrid	human_orth			Q16740	clpp-1		lin-23	bioGrid	human_orth
								P10809	hsp-60		MRPL44	bioGrid	human_orth			Q16740	clpp-1		M01E5.2	bioGrid	human_orth
								P10809	hsp-60		MRPL45	bioGrid	human_orth			Q16740	clpp-1		M04B2.4	bioGrid	human_orth
								P10809	hsp-60		MRPL46	bioGrid	human_orth			Q16740	clpp-1		M153.1	bioGrid	human_orth
								P10809	hsp-60		MRPL47	bioGrid	human_orth			Q16740	clpp-1		M153.1	bioGrid	human_orth
								P10809	hsp-60		MRPL48	bioGrid	human_orth			Q16740	clpp-1		men-1	bioGrid	human_orth
								P10809	hsp-60		MRPL50	bioGrid	human_orth			Q16740	clpp-1		mrpl-12	bioGrid	human_orth
								P10809	hsp-60		MRPL9	bioGrid	human_orth			Q16740	clpp-1		mrps-30	bioGrid	human_orth
								P10809	hsp-60		MRPS10	bioGrid	human_orth			Q16740	clpp-1		mrps-30	bioGrid	human_orth
								P10809	hsp-60		MRPS11	bioGrid	human_orth			Q16740	clpp-1		nuo-4	bioGrid	human_orth
								P10809	hsp-60		MRPS14	bioGrid	human_orth			Q16740	clpp-1		nuo-4	bioGrid	human_orth
								P10809	hsp-60		MRPS15	bioGrid	human_orth			Q16740	clpp-1		oatr-1	bioGrid	human_orth
								P10809	hsp-60		MRPS16	bioGrid	human_orth			Q16740	clpp-1		pacs-1	bioGrid	human_orth
								P10809	hsp-60		MRPS17	bioGrid	human_orth			Q16740	clpp-1		pdhk-2	bioGrid	human_orth
								P10809	hsp-60		MRPL3	bioGrid	human_orth			Q16740	clpp-1		prdx-3	bioGrid	human_orth
								P10809	hsp-60		MRPS2	bioGrid	human_orth			Q16740	clpp-1		pyp-1	bioGrid	human_orth
								P10809	hsp-60		MRPS22	bioGrid	human_orth			Q16740	clpp-1		pyp-1	bioGrid	human_orth
								P10809	hsp-60		MRPS23	bioGrid	human_orth			Q16740	clpp-1		snrp-27	bioGrid	human_orth
								P10809	hsp-60		MRPS24	bioGrid	human_orth			Q16740	clpp-1		swsn-9	bioGrid	human_orth
								P10809	hsp-60		MRPS25	bioGrid	human_orth			Q16740	clpp-1		T05H10.1	bioGrid	human_orth
								P10809	hsp-60		MRPS26	bioGrid	human_orth			Q16740	clpp-1		wah-1	bioGrid	human_orth
								P10809	hsp-60		MRPS27	bioGrid	human_orth			Q16740	clpp-1		Y17G9B.5	bioGrid	human_orth
								P10809	hsp-60		MRPS28	bioGrid	human_orth			Q16740	clpp-1		Y17G9B.5	bioGrid	human_orth
								P10809	hsp-60		MRPS30	bioGrid	human_orth			Q16740	clpp-1		Y45F3A.9	bioGrid	human_orth
								P10809	hsp-60		MRPS31	bioGrid	human_orth			Q16740	clpp-1	Q9NYB9	abi-1	Mentha	human_orth
								P10809	hsp-60		MRPS33	bioGrid	human_orth			Q16740	clpp-1	P11310	acdh-1	Mentha	human_orth
								P10809	hsp-60		MRPS34	bioGrid	human_orth			Q16740	clpp-1	P45954	acdh-1	Mentha	human_orth
								P10809	hsp-60		MRPS35	bioGrid	human_orth			Q16740	clpp-1	Q99798	aco-2	Mentha	human_orth
								P10809	hsp-60		MRPS5	bioGrid	human_orth			Q16740	clpp-1	Q9NUB1	acs-19	Mentha	human_orth
								P10809	hsp-60		MRPS7	bioGrid	human_orth			Q16740	clpp-1	Q9HBZ2	aha-1	Mentha	human_orth
								P10809	hsp-60		MRPS9	bioGrid	human_orth			Q16740	clpp-1	Q8WYA1	aha-1	Mentha	human_orth
								P10809	hsp-60		DCLRE1B	bioGrid	human_orth			Q16740	clpp-1	P30038	alh-6	Mentha	human_orth
								P10809	hsp-60		MTCH2	bioGrid	human_orth			Q16740	clpp-1	Q9NWT8	AURKAIP1	Mentha	human_orth
								P10809	hsp-60		SSBP1	bioGrid	human_orth			Q16740	clpp-1	Q9Y697	B0205.6	Mentha	human_orth
								P10809	hsp-60		TRMU	bioGrid	human_orth			Q16740	clpp-1	P55809	C05C10.3	Mentha	human_orth
								P10809	hsp-60		NARS2	bioGrid	human_orth			Q16740	clpp-1	Q9NWQ9	C14ORF119	Mentha	human_orth
								P10809	hsp-60		NDUFS6	bioGrid	human_orth			Q16740	clpp-1	O00422	C16C10.4	Mentha	human_orth
								P10809	hsp-60		NDUFS7	bioGrid	human_orth			Q16740	clpp-1	Q9BUV8	C20ORF24	Mentha	human_orth
								P10809	hsp-60		NUDT19	bioGrid	human_orth			Q16740	clpp-1	O95674	C33H5.18	Mentha	human_orth
								P10809	hsp-60		NEDD8	bioGrid	human_orth			Q16740	clpp-1	Q9NVA1	C35D10.5	Mentha	human_orth
								P10809	hsp-60		NR2C2	bioGrid	human_orth			Q16740	clpp-1	Q9HA77	cars-1	Mentha	human_orth
								P10809	hsp-60		SLC9A1	bioGrid	human_orth			Q16740	clpp-1	P10606	cco-1	Mentha	human_orth
								P10809	hsp-60		NNT	bioGrid	human_orth			Q16740	clpp-1	P20674	cco-2	Mentha	human_orth
								P10809	hsp-60		NSUN4	bioGrid	human_orth			Q16740	clpp-1	Q9NZJ6	coq-3	Mentha	human_orth
								P10809	hsp-60		NDUFAF1	bioGrid	human_orth			Q16740	clpp-1	Q96I36	COX14	Mentha	human_orth
								P10809	hsp-60		NDUFAF3	bioGrid	human_orth			Q16740	clpp-1	P15954	COX7C	Mentha	human_orth
								P10809	hsp-60		NDUFV1	bioGrid	human_orth			Q16740	clpp-1	O75390	cts-1	Mentha	human_orth
								P10809	hsp-60		NDUFS3	bioGrid	human_orth			Q16740	clpp-1	Q8N4T8	dhs-11	Mentha	human_orth
								P10809	hsp-60		NDUFA6	bioGrid	human_orth			Q16740	clpp-1	Q86UW9	DTX2	Mentha	human_orth
								P10809	hsp-60		NDUFA10	bioGrid	human_orth			Q16740	clpp-1	Q92947	F54D5.7	Mentha	human_orth
								P10809	hsp-60		NDUFS1	bioGrid	human_orth			Q16740	clpp-1	Q12805	fbl-1	Mentha	human_orth
								P10809	hsp-60		NXF1	bioGrid	human_orth			Q16740	clpp-1	O95967	fbl-1	Mentha	human_orth
								P10809	hsp-60		OAT	bioGrid	human_orth			Q16740	clpp-1	Q96EF6	FBXO17	Mentha	human_orth
								P10809	hsp-60		OGDH	bioGrid	human_orth			Q16740	clpp-1	P14324	fdps-1	Mentha	human_orth
								P10809	hsp-60		DHTKD1	bioGrid	human_orth			Q16740	clpp-1	P22830	FECH	Mentha	human_orth
								P10809	hsp-60		PAN2	bioGrid	human_orth			Q16740	clpp-1	Q9NVH6	gbh-2	Mentha	human_orth
								P10809	hsp-60		PARD3	bioGrid	human_orth			Q16740	clpp-1	P01241	gdh-1	Mentha	human_orth
								P10809	hsp-60		PSMA3	bioGrid	human_orth			Q16740	clpp-1	P49448	GLUD2	Mentha	human_orth
								P10809	hsp-60		ITGA4	bioGrid	human_orth			Q16740	clpp-1	Q9Y2Q3	gstk-2	Mentha	human_orth
								P10809	hsp-60		ITGB1	bioGrid	human_orth			Q16740	clpp-1	P30480	HLA-B	Mentha	human_orth
								P10809	hsp-60		CDKN2AIP	bioGrid	human_orth			Q16740	clpp-1	Q00059	hmg-5	Mentha	human_orth
								P10809	hsp-60		PCK1	bioGrid	human_orth			Q16740	clpp-1	P10809	HSPD1	Mentha	human_orth
								P10809	hsp-60		PCK2	bioGrid	human_orth			Q16740	clpp-1	O43837	IDH3B	Mentha	human_orth
								P10809	hsp-60		PDE12	bioGrid	human_orth			Q16740	clpp-1	Q9BPW8	K02D10.1	Mentha	human_orth
								P10809	hsp-60		PDK3	bioGrid	human_orth			Q16740	clpp-1	O76031	K07A3.3	Mentha	human_orth
								P10809	hsp-60		PHB	bioGrid	human_orth			Q16740	clpp-1	P00533	let-23	Mentha	human_orth
								P10809	hsp-60		PLCG2	bioGrid	human_orth			Q16740	clpp-1	P67775	let-92	Mentha	human_orth
								P10809	hsp-60		POLG	bioGrid	human_orth			Q16740	clpp-1	Q9UKB1	lin-23	Mentha	human_orth
								P10809	hsp-60		PPT1	bioGrid	human_orth			Q16740	clpp-1	Q9H4K7	M01E5.2	Mentha	human_orth
								P10809	hsp-60		PRDX3	bioGrid	human_orth			Q16740	clpp-1	Q96CU9	M04B2.4	Mentha	human_orth
								P10809	hsp-60		PRPF8	bioGrid	human_orth			Q16740	clpp-1	P51659	maoc-1	Mentha	human_orth
								P10809	hsp-60		PUS1	bioGrid	human_orth			Q16740	clpp-1	Q93062	mec-8	Mentha	human_orth
								P10809	hsp-60		PPA1	bioGrid	human_orth			Q16740	clpp-1	Q99643	mev-1	Mentha	human_orth
								P10809	hsp-60		PPA2	bioGrid	human_orth			Q16740	clpp-1	O14880	MGST3	Mentha	human_orth
								P10809	hsp-60		DCAF5	bioGrid	human_orth			Q16740	clpp-1	O75439	mppb-1	Mentha	human_orth
								P10809	hsp-60		RTN4IP1	bioGrid	human_orth			Q16740	clpp-1	Q16762	mpst-6	Mentha	human_orth
								P10809	hsp-60		GRSF1	bioGrid	human_orth			Q16740	clpp-1	P52815	MRPL12	Mentha	human_orth
								P10809	hsp-60		RBX1	bioGrid	human_orth			Q16740	clpp-1	Q9NP92	mrps-30	Mentha	human_orth
								P10809	hsp-60		SF3A2	bioGrid	human_orth			Q16740	clpp-1	Q96E11	mrrf-1	Mentha	human_orth
								P10809	hsp-60		RIOK1	bioGrid	human_orth			Q16740	clpp-1	P03928	MT-ATP8	Mentha	human_orth
								P10809	hsp-60		PUF60	bioGrid	human_orth			Q16740	clpp-1	P03886	MT-ND1	Mentha	human_orth
								P10809	hsp-60		PSMD14	bioGrid	human_orth			Q16740	clpp-1	O75570	MTRF1	Mentha	human_orth
								P10809	hsp-60		RPS6KB2	bioGrid	human_orth			Q16740	clpp-1	Q04837	mtss-1	Mentha	human_orth
								P10809	hsp-60		SARS2	bioGrid	human_orth			Q16740	clpp-1	Q96I59	nars-2	Mentha	human_orth
								P10809	hsp-60		SCARB2	bioGrid	human_orth			Q16740	clpp-1	O95299	NDUFA10	Mentha	human_orth
								P10809	hsp-60		SDHA	bioGrid	human_orth			Q16740	clpp-1	O00483	NDUFA4	Mentha	human_orth
								P10809	hsp-60		PACSIN2	bioGrid	human_orth			Q16740	clpp-1	Q96JN8	NEURL4	Mentha	human_orth
								P10809	hsp-60		PACSIN3	bioGrid	human_orth			Q16740	clpp-1	Q9Y375	nuaf-1	Mentha	human_orth
								P10809	hsp-60		GRB2	bioGrid	human_orth			Q16740	clpp-1	Q15118	pdhk-2	Mentha	human_orth
								P10809	hsp-60		ADRB2	bioGrid	human_orth			Q16740	clpp-1	Q15120	pdhk-2	Mentha	human_orth
								P10809	hsp-60		SFXN1	bioGrid	human_orth			Q16740	clpp-1	Q9UHN1	POLG2	Mentha	human_orth
								P10809	hsp-60		SIRT1	bioGrid	human_orth			Q16740	clpp-1	Q9UGM6	prx-10	Mentha	human_orth
								P10809	hsp-60		SIRT4	bioGrid	human_orth			Q16740	clpp-1	P20618	PSMB1	Mentha	human_orth
								P10809	hsp-60		SNW1	bioGrid	human_orth			Q16740	clpp-1	Q9H2U2	pyp-1	Mentha	human_orth
								P10809	hsp-60		SNAI1	bioGrid	human_orth			Q16740	clpp-1	Q499Y1	Q499Y1	Mentha	human_orth
								P10809	hsp-60		SUCLA2	bioGrid	human_orth			Q16740	clpp-1	P61970	ran-4	Mentha	human_orth
								P10809	hsp-60		SUCLG1	bioGrid	human_orth			Q16740	clpp-1	O75880	sco-1	Mentha	human_orth
								P10809	hsp-60		PPP2R2C	bioGrid	human_orth			Q16740	clpp-1	Q9NRQ2	scrm-2	Mentha	human_orth
								P10809	hsp-60		YBEY	bioGrid	human_orth			Q16740	clpp-1	P31040	sdha-1	Mentha	human_orth
								P10809	hsp-60		ACOT1	bioGrid	human_orth			Q16740	clpp-1	Q16637	smn-1	Mentha	human_orth
								P10809	hsp-60		ACOT2	bioGrid	human_orth			Q16740	clpp-1	Q8WVK2	snrp-27	Mentha	human_orth
								P10809	hsp-60		NDUFS8	bioGrid	human_orth			Q16740	clpp-1	Q96K76	T05H10.1	Mentha	human_orth
								P10809	hsp-60		TACO1	bioGrid	human_orth			Q16740	clpp-1	P13196	T25B9.1	Mentha	human_orth
								P10809	hsp-60		YAF2	bioGrid	human_orth			Q16740	clpp-1	P12074	tag-174	Mentha	human_orth
								P10809	hsp-60		GID8	bioGrid	human_orth			Q16740	clpp-1	Q9Y2S7	tag-307	Mentha	human_orth
								P10809	hsp-60		POLDIP2	bioGrid	human_orth			Q16740	clpp-1	Q9UDW1	UQCR10	Mentha	human_orth
								P10809	hsp-60		GMPPB	bioGrid	human_orth			Q16740	clpp-1	Q96IX5	USMG5	Mentha	human_orth
								P10809	hsp-60		TUBB4B	bioGrid	human_orth			Q16740	clpp-1	Q9BVS5	W02A11.1	Mentha	human_orth
								P10809	hsp-60		TFB1M	bioGrid	human_orth			Q16740	clpp-1	O95831	wah-1	Mentha	human_orth
								P10809	hsp-60		QTRT1	bioGrid	human_orth			Q16740	clpp-1	Q9BQ95	Y17G9B.5	Mentha	human_orth
								P10809	hsp-60		TIMM44	bioGrid	human_orth			Q16740	clpp-1	Q9H0R6	Y41D4A.6	Mentha	human_orth
								P10809	hsp-60		TRMT1L	bioGrid	human_orth			Q16740	clpp-1	Q7Z4N8	Y43F8B.19	Mentha	human_orth
								P10809	hsp-60		TRMT2B	bioGrid	human_orth			Q16740	clpp-1	P52736	Y55F3AM.14	Mentha	human_orth
								P10809	hsp-60		TSFM	bioGrid	human_orth			Q16740	clpp-1	P10109	Y73F8A.27	Mentha	human_orth
								P10809	hsp-60		VRK1	bioGrid	human_orth			Q16740	clpp-1	P58557	YBEY	Mentha	human_orth
								P10809	hsp-60		VRK3	bioGrid	human_orth			Q16740	clpp-1	Q9UIJ7	ZK673.2	Mentha	human_orth
								P10809	hsp-60		AGR2	bioGrid	human_orth			Q16740	clpp-1	P27144	ZK673.2	Mentha	human_orth
								P10809	hsp-60		U2AF2	bioGrid	human_orth			Q27539	clpp-1	O61709	R119.3	bioGrid	direct
								P10809	hsp-60		AKTIP	bioGrid	human_orth			Q27539	clpp-1	E9RKC7	Y95B8A.8	bioGrid	direct
								P10809	hsp-60		UBC	bioGrid	human_orth			Q01826	dve-1		CHD3	bioGrid	human_orth
								P10809	hsp-60		UBR4	bioGrid	human_orth			Q01826	dve-1		CTNNB1	bioGrid	human_orth
								P10809	hsp-60		FAF1	bioGrid	human_orth			Q01826	dve-1		PIAS1	bioGrid	human_orth
								P10809	hsp-60		UQCRC2	bioGrid	human_orth			Q01826	dve-1		PIAS3	bioGrid	human_orth
								P10809	hsp-60		VDAC1	bioGrid	human_orth			Q01826	dve-1		PIAS4	bioGrid	human_orth
								P10809	hsp-60		ATP6V1A	bioGrid	human_orth			Q01826	dve-1		PML	bioGrid	human_orth
								P10809	hsp-60		VWA8	bioGrid	human_orth			Q01826	dve-1		SMARCA5	bioGrid	human_orth
								P10809	hsp-60		NAGK	bioGrid	human_orth			Q01826	dve-1		TAL1	bioGrid	human_orth
								P10809	hsp-60		MOV10	bioGrid	human_orth			Q01826	dve-1		QPRT	bioGrid	human_orth
								P10809	hsp-60		ATPAF2	bioGrid	human_orth			Q01826	dve-1		TEAD2	bioGrid	human_orth
								P10809	hsp-60		NDUFAF2	bioGrid	human_orth			Q01826	dve-1		FOXA1	bioGrid	human_orth
								P10809	hsp-60		MEPCE	bioGrid	human_orth			Q01826	dve-1		FOXB1	bioGrid	human_orth
								P10809	hsp-60		HAGH	bioGrid	human_orth			Q01826	dve-1		FOXC1	bioGrid	human_orth
								P10809	hsp-60		HSPE1	bioGrid	human_orth			Q01826	dve-1		FOXC2	bioGrid	human_orth
								P10809	hsp-60		QRSL1	bioGrid	human_orth			Q01826	dve-1		FOXD3	bioGrid	human_orth
								P10809	hsp-60		GORASP1	bioGrid	human_orth			Q01826	dve-1		FOXE1	bioGrid	human_orth
								P10809	hsp-60		TRUB2	bioGrid	human_orth			Q01826	dve-1		FOXF1	bioGrid	human_orth
								P10809	hsp-60		NDUFA9	bioGrid	human_orth			Q01826	dve-1		FOXG1	bioGrid	human_orth
								P10809	hsp-60		SARNP	bioGrid	human_orth			Q01826	dve-1		FOXL1	bioGrid	human_orth
[truncated: 2,664 more rows]

## Sheet: direct interactions
type	interaction	source		source	source Protein	target	target protein	Screening results
direct	hsp-6 (direct) hsp-60	bioGrid		hsp-6	P38646	hsp-60	P10809	UPRmt-Ome Genes	●
direct	pop-1 (direct) bar-1	bioGrid		pop-1	Q13015	bar-1	P14923	UPRmt-Ome Genes	●
direct	pop-1 (direct) bar-1	bioGrid		pop-1	Q13015	bar-1	P14923	UPRmt-Ome Genes	●
direct	hsp-60 (direct) hsp-6	bioGrid		hsp-60	P10809	hsp-6	P38646	UPRmt-Ome Genes	●
direct	bar-1 (direct) pop-1	bioGrid		bar-1	P14923	pop-1	Q13015	UPRmt-Ome Genes	●
direct	bar-1 (direct) pop-1	IntAct		bar-1	P14923	pop-1	Q13015	UPRmt-Ome Genes	●
direct	bar-1 (direct) dcn-1	bioGrid		bar-1	P14923	dcn-1	Q9U3C8	S	➤
direct	bar-1 (direct) icd-1	bioGrid		bar-1	P14923	icd-1	Q18885	S	➤
direct	bar-1 (direct) kin-10	bioGrid		bar-1	P14923	kin-10	P28548	S	➤
direct	bar-1 (direct) rps-0	bioGrid		bar-1	P14923	rps-0	P46769	S	➤
direct	bar-1 (direct) tbp-1	bioGrid		bar-1	P14923	tbp-1	P32085	S	➤
direct	bar-1 (direct) vps-4	bioGrid		bar-1	P14923	vps-4	Q9BL83	S	➤
direct	hsp-6 (direct) rps-28	bioGrid		hsp-6	P38646	rps-28	Q95Y04	S	➤
direct	hsp-60 (direct) snr-3	bioGrid		hsp-60	P10809	snr-3	Q10013	S	➤
direct	bar-1 (direct) hsf-1	bioGrid		bar-1	P14923	hsf-1	G5EFT5	S	➤
direct	mig-14 (direct) nog-1	bioGrid		mig-14	Q5T9L3	nog-1	O44411	S	➤
direct	hsp-60 (direct) teg-4	bioGrid		hsp-60	P10809	teg-4	O44985	S	➤
direct	bar-1 (direct) T20B12.3	bioGrid		bar-1	P14923	T20B12.3	P41843	S	➤
direct	bar-1 (direct) rps-21	bioGrid		bar-1	P14923	rps-21	P49197	S	➤
direct	hsp-6 (direct) rps-21	bioGrid		hsp-6	P38646	rps-21	P49197	S	➤
direct	bar-1 (direct) lam-2	bioGrid		bar-1	P14923	lam-2	Q18823	S	➤
direct	bar-1 (direct) rnp-4	bioGrid		bar-1	P14923	rnp-4	Q21832	S	➤
direct	bar-1 (direct) rpc-2	bioGrid		bar-1	P14923	rpc-2	Q27492	S	➤
direct	atfs-1 (direct) lin-54	IntAct		atfs-1	P18848	lin-54	Q95QD7	S	➤
direct	bar-1 (direct) vps-20	bioGrid		bar-1	P14923	vps-20	Q9BL60	S	➤
direct	bar-1 (direct) tfg-1	bioGrid		bar-1	P14923	tfg-1	Q9U1W1	S	➤
direct	hsp-60 (direct) snr-6	bioGrid		hsp-60	P10809	snr-6	Q9XTU6	S	➤
direct	bar-1 (direct) C35D10.5	bioGrid		bar-1	P14923	C35D10.5	Q18485	E	➤
direct	bar-1 (direct) plc-1	bioGrid		bar-1	P14923	plc-1	G5EFI8	E	➤
direct	bar-1 (direct) fum-1	bioGrid		bar-1	P14923	fum-1	O17214	E	➤
direct	hsp-6 (direct) sdha-1	bioGrid		hsp-6	P38646	sdha-1	P31040	E	➤
direct	hsp-60 (direct) sdha-1	bioGrid		hsp-60	P10809	sdha-1	P31040	E	➤

## Sheet: Interaction of human ortho
type	interaction	source		source	source Protein	source human ortholog	target	target protein	target human ortholog	Screening results
human_orth	bar-1 (human_orth) dve-1	bioGrid		bar-1	P14923	JUP	dve-1	Q01826	SATB1	UPRmt-Ome Genes	●
human_orth	bar-1 (human_orth) dve-1	Mentha		bar-1	P14923	JUP	dve-1	Q01826	SATB1	UPRmt-Ome Genes	●
human_orth	bar-1 (human_orth) hsp-6	bioGrid		bar-1	P14923	JUP	hsp-6	P38646	HSPA9	UPRmt-Ome Genes	●
human_orth	bar-1 (human_orth) hsp-60	bioGrid		bar-1	P14923	JUP	hsp-60	P10809	HSPD1	UPRmt-Ome Genes	●
human_orth	bar-1 (human_orth) pop-1	bioGrid		bar-1	P14923	JUP	pop-1	Q13015	TCF7L2	UPRmt-Ome Genes	●
human_orth	bar-1 (human_orth) pop-1	bioGrid		bar-1	P14923	JUP	pop-1	Q13015	TCF7L2	UPRmt-Ome Genes	●
human_orth	bar-1 (human_orth) pop-1	Mentha		bar-1	P14923	JUP	pop-1	Q13015	TCF7L2	UPRmt-Ome Genes	●
human_orth	bar-1 (human_orth) pop-1	Mentha		bar-1	P14923	JUP	pop-1	Q13015	TCF7L2	UPRmt-Ome Genes	●
human_orth	clpp-1 (human_orth) hsp-60	bioGrid		clpp-1	Q16740	CLPP	hsp-60	P10809	HSPD1	UPRmt-Ome Genes	●
human_orth	dve-1 (human_orth) bar-1	Mentha		dve-1	Q01826	SATB1	bar-1	P14923	JUP	UPRmt-Ome Genes	●
human_orth	egl-20 (human_orth) mig-14	bioGrid		egl-20	Q9UBV4	WNT16	mig-14	Q5T9L3	WLS	UPRmt-Ome Genes	●
human_orth	egl-20 (human_orth) mig-14	Mentha		egl-20	Q9UBV4	WNT16	mig-14	Q5T9L3	WLS	UPRmt-Ome Genes	●
human_orth	hsp-6 (human_orth) bar-1	bioGrid		hsp-6	P38646	HSPA9	bar-1	P14923	JUP	UPRmt-Ome Genes	●
human_orth	hsp-6 (human_orth) hsp-60	bioGrid		hsp-6	P38646	HSPA9	hsp-60	P10809	HSPD1	UPRmt-Ome Genes	●
human_orth	hsp-60 (human_orth) bar-1	bioGrid		hsp-60	P10809	HSPD1	bar-1	P14923	JUP	UPRmt-Ome Genes	●
human_orth	hsp-60 (human_orth) clpp-1	Mentha		hsp-60	P10809	HSPD1	clpp-1	Q16740	CLPP	UPRmt-Ome Genes	●
human_orth	mig-14 (human_orth) egl-20	bioGrid		mig-14	Q5T9L3	WLS	egl-20	Q9UBV4	WNT16	UPRmt-Ome Genes	●
human_orth	pop-1 (human_orth) bar-1	bioGrid		pop-1	Q13015	TCF7L2	bar-1	P14923	JUP	UPRmt-Ome Genes	●
human_orth	pop-1 (human_orth) bar-1	Mentha		pop-1	Q13015	TCF7L2	bar-1	P14923	JUP	UPRmt-Ome Genes	●
human_orth	atfs-1 (human_orth) gtf-2F2	bioGrid		atfs-1	P18848	ATF4	gtf-2F2	Q8MYM8	GTF2F2	S	➤
human_orth	atfs-1 (human_orth) gtf-2F2	Mentha		atfs-1	P18848	ATF4	gtf-2F2	Q8MYM8	GTF2F2	S	➤
human_orth	atfs-1 (human_orth) rps-6	bioGrid		atfs-1	P18848	ATF4	rps-6	Q9NEN6	RPS6	S	➤
human_orth	atfs-1 (human_orth) rps-6	Mentha		atfs-1	P18848	ATF4	rps-6	Q9NEN6	RPS6	S	➤
human_orth	atfs-1 (human_orth) spr-2	Mentha		atfs-1	P18848	ATF4	spr-2	Q18240	NAP1L5	S	➤
human_orth	atfs-1 (human_orth) tbp-1	bioGrid		atfs-1	P18848	ATF4	tbp-1	P32085	TBP	S	➤
human_orth	atfs-1 (human_orth) tbp-1	Mentha		atfs-1	P18848	ATF4	tbp-1	P32085	TBP	S	➤
human_orth	bar-1 (human_orth) cap-1	bioGrid		bar-1	P14923	JUP	cap-1	P34685	CAPZA1	S	➤
human_orth	bar-1 (human_orth) cap-1	bioGrid		bar-1	P14923	JUP	cap-1	P34685	CAPZA1	S	➤
human_orth	bar-1 (human_orth) cap-2	bioGrid		bar-1	P14923	JUP	cap-2	P34686	CAPZB	S	➤
human_orth	bar-1 (human_orth) cct-2	bioGrid		bar-1	P14923	JUP	cct-2	P47207	CCT2	S	➤
human_orth	bar-1 (human_orth) cdk-9	bioGrid		bar-1	P14923	JUP	cdk-9	Q9TVL3	CDK9	S	➤
human_orth	bar-1 (human_orth) cgh-1	Mentha		bar-1	P14923	JUP	cgh-1	P26196	DDX6	S	➤
human_orth	bar-1 (human_orth) E02H1.1	bioGrid		bar-1	P14923	JUP	E02H1.1	Q09522	DIMT1	S	➤
human_orth	bar-1 (human_orth) eif-6	bioGrid		bar-1	P14923	JUP	eif-6	O62106	EIF6	S	➤
human_orth	bar-1 (human_orth) fars-1	bioGrid		bar-1	P14923	JUP	fars-1	Q9GYS8	FARSA	S	➤
human_orth	bar-1 (human_orth) gbf-1	bioGrid		bar-1	P14923	JUP	gbf-1	H8ESE7	GBF1	S	➤
human_orth	bar-1 (human_orth) gbf-1	bioGrid		bar-1	P14923	JUP	gbf-1	H8ESE7	GBF1	S	➤
human_orth	bar-1 (human_orth) gbf-1	bioGrid		bar-1	P14923	JUP	gbf-1	H8ESE7	GBF1	S	➤
human_orth	bar-1 (human_orth) icd-1	bioGrid		bar-1	P14923	JUP	icd-1	Q18885	BTF3	S	➤
human_orth	bar-1 (human_orth) icd-1	Mentha		bar-1	P14923	JUP	icd-1	Q18885	BTF3	S	➤
human_orth	bar-1 (human_orth) K12H4.3	Mentha		bar-1	P14923	JUP	K12H4.3	Q8TDN6	BRIX1	S	➤
human_orth	bar-1 (human_orth) let-418	bioGrid		bar-1	P14923	JUP	let-418	G5EBZ4	CHD4	S	➤
human_orth	bar-1 (human_orth) npp-20	bioGrid		bar-1	P14923	JUP	npp-20	Q9N4A7	SEC13	S	➤
human_orth	bar-1 (human_orth) rae-1	bioGrid		bar-1	P14923	JUP	rae-1	Q93454	RAE1	S	➤
human_orth	bar-1 (human_orth) rbx-1	Mentha		bar-1	P14923	JUP	rbx-1	Q23457	RBX1	S	➤
human_orth	bar-1 (human_orth) rpac-40	bioGrid		bar-1	P14923	JUP	rpac-40	Q9UAY9	POLR1C	S	➤
human_orth	bar-1 (human_orth) rpl-12	bioGrid		bar-1	P14923	JUP	rpl-12	P61866	RPL12	S	➤
human_orth	bar-1 (human_orth) rpl-12	bioGrid		bar-1	P14923	JUP	rpl-12	P61866	RPL12	S	➤
human_orth	bar-1 (human_orth) rpl-18	bioGrid		bar-1	P14923	JUP	rpl-18	O45946	RPL18	S	➤
human_orth	bar-1 (human_orth) rpl-20	bioGrid		bar-1	P14923	JUP	rpl-20	O44480	RPL18A	S	➤
human_orth	bar-1 (human_orth) rpl-21	bioGrid		bar-1	P14923	JUP	rpl-21	P34334	RPL21	S	➤
human_orth	bar-1 (human_orth) rpl-21	Mentha		bar-1	P14923	JUP	rpl-21	P34334	RPL21	S	➤
human_orth	bar-1 (human_orth) rpl-21	Mentha		bar-1	P14923	JUP	rpl-21	P34334	RPL21	S	➤
human_orth	bar-1 (human_orth) rpl-23	bioGrid		bar-1	P14923	JUP	rpl-23	P48158	RPL23	S	➤
human_orth	bar-1 (human_orth) rpl-25.1	bioGrid		bar-1	P14923	JUP	rpl-25.1	P48162	RPL23A	S	➤
human_orth	bar-1 (human_orth) rpl-30	bioGrid		bar-1	P14923	JUP	rpl-30	Q9XWS4	RPL30	S	➤
human_orth	bar-1 (human_orth) rpl-31	bioGrid		bar-1	P14923	JUP	rpl-31	Q9U332	RPL31	S	➤
human_orth	bar-1 (human_orth) rpl-9	bioGrid		bar-1	P14923	JUP	rpl-9	Q95Y90	RPL9	S	➤
human_orth	bar-1 (human_orth) rps-0	bioGrid		bar-1	P14923	JUP	rps-0	P46769	RPSA	S	➤
human_orth	bar-1 (human_orth) rps-0	Mentha		bar-1	P14923	JUP	rps-0	P46769	RPSA	S	➤
human_orth	bar-1 (human_orth) rps-1	bioGrid		bar-1	P14923	JUP	rps-1	P48154	RPS3A	S	➤
human_orth	bar-1 (human_orth) rps-1	bioGrid		bar-1	P14923	JUP	rps-1	P48154	RPS3A	S	➤
human_orth	bar-1 (human_orth) rps-11	bioGrid		bar-1	P14923	JUP	rps-11	Q20206	RPS11	S	➤
human_orth	bar-1 (human_orth) rps-14	bioGrid		bar-1	P14923	JUP	rps-14	P48150	RPS14	S	➤
human_orth	bar-1 (human_orth) rps-16	bioGrid		bar-1	P14923	JUP	rps-16	Q22054	RPS16	S	➤
human_orth	bar-1 (human_orth) rps-19	bioGrid		bar-1	P14923	JUP	rps-19	O18650	RPS19	S	➤
human_orth	bar-1 (human_orth) rps-22	bioGrid		bar-1	P14923	JUP	rps-22	O17218	RPS15A	S	➤
human_orth	bar-1 (human_orth) rps-24	bioGrid		bar-1	P14923	JUP	rps-24	Q1XFY9	RPS24	S	➤
human_orth	bar-1 (human_orth) rps-27	bioGrid		bar-1	P14923	JUP	rps-27	Q9TXP0	RPS27	S	➤
human_orth	bar-1 (human_orth) rps-28	bioGrid		bar-1	P14923	JUP	rps-28	Q95Y04	RPS28	S	➤
human_orth	bar-1 (human_orth) rps-3	bioGrid		bar-1	P14923	JUP	rps-3	P48152	RPS3	S	➤
human_orth	bar-1 (human_orth) rps-4	bioGrid		bar-1	P14923	JUP	rps-4	Q9N3X2	RPS4X	S	➤
human_orth	bar-1 (human_orth) rps-5	bioGrid		bar-1	P14923	JUP	rps-5	P49041	RPS5	S	➤
human_orth	bar-1 (human_orth) rps-6	bioGrid		bar-1	P14923	JUP	rps-6	Q9NEN6	RPS6	S	➤
human_orth	bar-1 (human_orth) rps-8	bioGrid		bar-1	P14923	JUP	rps-8	P48156	RPS8	S	➤
human_orth	bar-1 (human_orth) rsr-2	bioGrid		bar-1	P14923	JUP	rsr-2	Q9U213	SRRM2	S	➤
human_orth	bar-1 (human_orth) ruvb-1	bioGrid		bar-1	P14923	JUP	ruvb-1	O17607	RUVBL1	S	➤
human_orth	bar-1 (human_orth) ruvb-1	Mentha		bar-1	P14923	JUP	ruvb-1	O17607	RUVBL1	S	➤
human_orth	bar-1 (human_orth) snr-3	bioGrid		bar-1	P14923	JUP	snr-3	Q10013	SNRPD1	S	➤
human_orth	bar-1 (human_orth) snr-3	Mentha		bar-1	P14923	JUP	snr-3	Q10013	SNRPD1	S	➤
human_orth	bar-1 (human_orth) spr-2	bioGrid		bar-1	P14923	JUP	spr-2	Q18240	NAP1L5	S	➤
human_orth	bar-1 (human_orth) tbp-1	bioGrid		bar-1	P14923	JUP	tbp-1	P32085	TBP	S	➤
human_orth	bar-1 (human_orth) vps-4	bioGrid		bar-1	P14923	JUP	vps-4	Q9BL83	VPS4B	S	➤
human_orth	clpp-1 (human_orth) pyp-1	bioGrid		clpp-1	Q16740	CLPP	pyp-1	Q18680	PPA2	S	➤
human_orth	clpp-1 (human_orth) pyp-1	bioGrid		clpp-1	Q16740	CLPP	pyp-1	Q18680	PPA2	S	➤
human_orth	clpp-1 (human_orth) pyp-1	Mentha		clpp-1	Q16740	CLPP	pyp-1	Q18680	PPA2	S	➤
human_orth	dve-1 (human_orth) ubc-9	bioGrid		dve-1	Q01826	SATB1	ubc-9	Q95017	UBE2I	S	➤
human_orth	hsp-6 (human_orth) cdk-9	bioGrid		hsp-6	P38646	HSPA9	cdk-9	Q9TVL3	CDK9	S	➤
human_orth	hsp-6 (human_orth) cul-1	Mentha		hsp-6	P38646	HSPA9	cul-1	Q13619	CUL4A	S	➤
human_orth	hsp-6 (human_orth) dcn-1	bioGrid		hsp-6	P38646	HSPA9	dcn-1	Q9U3C8	DCUN1D1	S	➤
human_orth	hsp-6 (human_orth) dcn-1	Mentha		hsp-6	P38646	HSPA9	dcn-1	Q9U3C8	DCUN1D1	S	➤
human_orth	hsp-6 (human_orth) eif-6	bioGrid		hsp-6	P38646	HSPA9	eif-6	O62106	EIF6	S	➤
human_orth	hsp-6 (human_orth) eif-6	Mentha		hsp-6	P38646	HSPA9	eif-6	O62106	EIF6	S	➤
human_orth	hsp-6 (human_orth) gop-2	bioGrid		hsp-6	P38646	HSPA9	gop-2	P46577	GPN1	S	➤
human_orth	hsp-6 (human_orth) gop-2	Mentha		hsp-6	P38646	HSPA9	gop-2	P46577	GPN1	S	➤
human_orth	hsp-6 (human_orth) let-418	bioGrid		hsp-6	P38646	HSPA9	let-418	G5EBZ4	CHD4	S	➤
human_orth	hsp-6 (human_orth) rbx-1	bioGrid		hsp-6	P38646	HSPA9	rbx-1	Q23457	RBX1	S	➤
human_orth	hsp-60 (human_orth) C34B2.8	Mentha		hsp-60	P10809	HSPD1	C34B2.8	Q9P0J0	NDUFA13	S	➤
human_orth	hsp-60 (human_orth) cdk-9	Mentha		hsp-60	P10809	HSPD1	cdk-9	Q9TVL3	CDK9	S	➤
human_orth	hsp-60 (human_orth) hars-1	Mentha		hsp-60	P10809	HSPD1	hars-1	P49590	HARS2	S	➤
human_orth	hsp-60 (human_orth) pyp-1	Mentha		hsp-60	P10809	HSPD1	pyp-1	Q18680	PPA2	S	➤
human_orth	hsp-60 (human_orth) pyp-1	Mentha		hsp-60	P10809	HSPD1	pyp-1	Q18680	PPA2	S	➤
human_orth	hsp-60 (human_orth) rsr-2	Mentha		hsp-60	P10809	HSPD1	rsr-2	Q9U213	SRRM2	S	➤
human_orth	hsp-60 (human_orth) tars-1	bioGrid		hsp-60	P10809	HSPD1	tars-1	P52709	TARS2	S	➤
human_orth	hsp-60 (human_orth) tars-1	Mentha		hsp-60	P10809	HSPD1	tars-1	P52709	TARS2	S	➤
human_orth	mig-14 (human_orth) emb-27	bioGrid		mig-14	Q5T9L3	WLS	emb-27	G5EG38	Cdc16	S	➤
human_orth	pop-1 (human_orth) F13H8.2	bioGrid		pop-1	Q13015	TCF7L2	F13H8.2	Q19433	WDR3	S	➤
human_orth	pop-1 (human_orth) ima-3	bioGrid		pop-1	Q13015	TCF7L2	ima-3	Q19969	Kpna1	S	➤
human_orth	pop-1 (human_orth) kin-10	bioGrid		pop-1	Q13015	TCF7L2	kin-10	P28548	CSNK2B	S	➤
human_orth	pop-1 (human_orth) let-418	bioGrid		pop-1	Q13015	TCF7L2	let-418	G5EBZ4	CHD4	S	➤
human_orth	pop-1 (human_orth) lpd-7	bioGrid		pop-1	Q13015	TCF7L2	lpd-7	Q95Y89	PES1	S	➤
human_orth	pop-1 (human_orth) ruvb-1	bioGrid		pop-1	Q13015	TCF7L2	ruvb-1	O17607	RUVBL1	S	➤
human_orth	pop-1 (human_orth) ruvb-1	Mentha		pop-1	Q13015	TCF7L2	ruvb-1	O17607	RUVBL1	S	➤
human_orth	pop-1 (human_orth) spt-16	bioGrid		pop-1	Q13015	TCF7L2	spt-16	Q9N5R9	SUPT16H	S	➤
human_orth	pop-1 (human_orth) tbp-1	bioGrid		pop-1	Q13015	TCF7L2	tbp-1	P32085	TBP	S	➤
human_orth	pop-1 (human_orth) ubc-9	bioGrid		pop-1	Q13015	TCF7L2	ubc-9	Q95017	UBE2I	S	➤
human_orth	pop-1 (human_orth) ubc-9	bioGrid		pop-1	Q13015	TCF7L2	ubc-9	Q95017	UBE2I	S	➤
human_orth	pop-1 (human_orth) ubc-9	Mentha		pop-1	Q13015	TCF7L2	ubc-9	Q95017	UBE2I	S	➤
human_orth	sphk-1 (human_orth) taf-4	Mentha		sphk-1	Q9NYA1	SPHK1	taf-4	O00268	TAF4	S	➤
human_orth	ubl-5 (human_orth) pqbp-1.2	Mentha		ubl-5	Q9BZL1	UBL5	pqbp-1.2	O60828	PQBP1	S	➤
human_orth	ubl-5 (human_orth) rbx-1	Mentha		ubl-5	Q9BZL1	UBL5	rbx-1	Q23457	RBX1	S	➤
human_orth	ubl-5 (human_orth) sfa-1	Mentha		ubl-5	Q9BZL1	UBL5	sfa-1	Q15637	SF1	S	➤
human_orth	ubl-5 (human_orth) snr-3	Mentha		ubl-5	Q9BZL1	UBL5	snr-3	Q10013	SNRPD1	S	➤
human_orth	sphk-1 (human_orth) kin-2	bioGrid		sphk-1	Q9NYA1	SPHK2	kin-2	P30625	KIN2	S	➤
human_orth	bar-1 (human_orth) ard-1	bioGrid		bar-1	P14923	JUP	ard-1	Q19102	HSD17B10	E	➤
human_orth	bar-1 (human_orth) copd-1	bioGrid		bar-1	P14923	JUP	copd-1	Q09236	ARCN1	E	➤
human_orth	bar-1 (human_orth) cox-18	bioGrid		bar-1	P14923	JUP	cox-18	Q9N356	OXA1L	E	➤
human_orth	bar-1 (human_orth) cri-3	bioGrid		bar-1	P14923	JUP	cri-3	Q21018	C1QBP	E	➤
human_orth	bar-1 (human_orth) hmg-5	bioGrid		bar-1	P14923	JUP	hmg-5	Q94234	TFAM	E	➤
human_orth	clpp-1 (human_orth) C35D10.5	bioGrid		clpp-1	Q16740	CLPP	C35D10.5	Q18485	UQCC1	E	➤
human_orth	clpp-1 (human_orth) C35D10.5	Mentha		clpp-1	Q16740	CLPP	C35D10.5	Q18485	UQCC1	E	➤
human_orth	clpp-1 (human_orth) hmg-5	Mentha		clpp-1	Q16740	CLPP	hmg-5	Q94234	TFAM	E	➤
human_orth	clpp-1 (human_orth) mev-1	Mentha		clpp-1	Q16740	CLPP	mev-1	Q99643	SDHC	E	➤
human_orth	clpp-1 (human_orth) nfs-1	Mentha		clpp-1	Q16740	CLPP	nfs-1	Q9Y697	NFS1	E	➤
human_orth	clpp-1 (human_orth) nuaf-1	Mentha		clpp-1	Q16740	CLPP	nuaf-1	Q9Y375	NDUFAF1	E	➤
human_orth	clpp-1 (human_orth) sdha-1	Mentha		clpp-1	Q16740	CLPP	sdha-1	P31040	SDHA	E	➤
human_orth	hsp-6 (human_orth) ard-1	bioGrid		hsp-6	P38646	HSPA9	ard-1	Q19102	HSD17B10	E	➤
human_orth	hsp-6 (human_orth) ard-1	Mentha		hsp-6	P38646	HSPA9	ard-1	Q19102	HSD17B10	E	➤
human_orth	hsp-6 (human_orth) cri-3	bioGrid		hsp-6	P38646	HSPA9	cri-3	Q21018	C1QBP	E	➤
human_orth	hsp-6 (human_orth) cri-3	Mentha		hsp-6	P38646	HSPA9	cri-3	Q21018	C1QBP	E	➤
human_orth	hsp-6 (human_orth) sdha-1	Mentha		hsp-6	P38646	HSPA9	sdha-1	P31040	SDHA	E	➤
human_orth	hsp-60 (human_orth) ard-1	Mentha		hsp-60	P10809	HSPD1	ard-1	Q19102	HSD17B10	E	➤
human_orth	hsp-60 (human_orth) B0035.15	Mentha		hsp-60	P10809	HSPD1	B0035.15	Q9P032	NDUFAF4	E	➤
human_orth	hsp-60 (human_orth) C08F8.2	Mentha		hsp-60	P10809	HSPD1	C08F8.2	Q8IYB8	SUPV3L1	E	➤
human_orth	hsp-60 (human_orth) C35D10.5	Mentha		hsp-60	P10809	HSPD1	C35D10.5	Q18485	UQCC1	E	➤
human_orth	hsp-60 (human_orth) cri-3	Mentha		hsp-60	P10809	HSPD1	cri-3	Q21018	C1QBP	E	➤
human_orth	hsp-60 (human_orth) F32A7.4	bioGrid		hsp-60	P10809	HSPD1	F32A7.4	P91862	METTL17	E	➤
human_orth	hsp-60 (human_orth) F32A7.4	Mentha		hsp-60	P10809	HSPD1	F32A7.4	P91862	METTL17	E	➤
human_orth	hsp-60 (human_orth) F39H2.3	Mentha		hsp-60	P10809	HSPD1	F39H2.3	Q5T440	IBA57	E	➤
human_orth	hsp-60 (human_orth) F46B6.6	bioGrid		hsp-60	P10809	HSPD1	F46B6.6	Q20447	MTIF2	E	➤
human_orth	hsp-60 (human_orth) F46B6.6	Mentha		hsp-60	P10809	HSPD1	F46B6.6	Q20447	MTIF2	E	➤
human_orth	hsp-60 (human_orth) gfm-1	Mentha		hsp-60	P10809	HSPD1	gfm-1	Q96RP9	GFM1	E	➤
human_orth	hsp-60 (human_orth) hmg-5	bioGrid		hsp-60	P10809	HSPD1	hmg-5	Q94234	TFAM	E	➤
human_orth	hsp-60 (human_orth) hmg-5	Mentha		hsp-60	P10809	HSPD1	hmg-5	Q94234	TFAM	E	➤
human_orth	hsp-60 (human_orth) hoe-1	bioGrid		hsp-60	P10809	HSPD1	hoe-1	O44476	ELAC2	E	➤
human_orth	hsp-60 (human_orth) hoe-1	Mentha		hsp-60	P10809	HSPD1	hoe-1	O44476	ELAC2	E	➤
human_orth	hsp-60 (human_orth) letm-1	bioGrid		hsp-60	P10809	HSPD1	letm-1	Q9XVM0	LETM1	E	➤
human_orth	hsp-60 (human_orth) letm-1	Mentha		hsp-60	P10809	HSPD1	letm-1	Q9XVM0	LETM1	E	➤
human_orth	hsp-60 (human_orth) mrpl-34	Mentha		hsp-60	P10809	HSPD1	mrpl-34	Q8N983	MRPL43	E	➤
human_orth	hsp-60 (human_orth) mrpl-4	Mentha		hsp-60	P10809	HSPD1	mrpl-4	Q9BYD3	MRPL4	E	➤
human_orth	hsp-60 (human_orth) mrpl-44	Mentha		hsp-60	P10809	HSPD1	mrpl-44	Q9H9J2	MRPL44	E	➤
human_orth	hsp-60 (human_orth) mrpl-46	Mentha		hsp-60	P10809	HSPD1	mrpl-46	Q9H2W6	MRPL46	E	➤
human_orth	hsp-60 (human_orth) mrps-11	Mentha		hsp-60	P10809	HSPD1	mrps-11	Q23155	MRPS11	E	➤
human_orth	hsp-60 (human_orth) mrps-14	Mentha		hsp-60	P10809	HSPD1	mrps-14	O60783	MRPS14	E	➤
human_orth	hsp-60 (human_orth) mrps-16	Mentha		hsp-60	P10809	HSPD1	mrps-16	Q10129	MRPS16	E	➤
human_orth	hsp-60 (human_orth) mrps-17	Mentha		hsp-60	P10809	HSPD1	mrps-17	Q9Y2R5	MRPS17	E	➤
human_orth	hsp-60 (human_orth) mrps-2	Mentha		hsp-60	P10809	HSPD1	mrps-2	O17004	MRPS2	E	➤
human_orth	hsp-60 (human_orth) mrps-24	Mentha		hsp-60	P10809	HSPD1	mrps-24	Q96EL2	MRPS24	E	➤
human_orth	hsp-60 (human_orth) mrps-28	Mentha		hsp-60	P10809	HSPD1	mrps-28	Q9Y2Q9	MRPS28	E	➤
human_orth	hsp-60 (human_orth) mrps-31	Mentha		hsp-60	P10809	HSPD1	mrps-31	Q09261	MRPS31	E	➤
human_orth	hsp-60 (human_orth) nuaf-1	Mentha		hsp-60	P10809	HSPD1	nuaf-1	Q9Y375	NDUFAF1	E	➤
human_orth	hsp-60 (human_orth) nuaf-3	Mentha		hsp-60	P10809	HSPD1	nuaf-3	Q9BU61	NDUFAF3	E	➤
human_orth	hsp-60 (human_orth) sars-2	Mentha		hsp-60	P10809	HSPD1	sars-2	Q9NP81	SARS2	E	➤
human_orth	hsp-60 (human_orth) yars-2	Mentha		hsp-60	P10809	HSPD1	yars-2	Q9Y2Z4	YARS2	E	➤
human_orth	hsp-60 (human_orth) ZK550.3	bioGrid		hsp-60	P10809	HSPD1	ZK550.3	O62512	THOP1	E	➤
human_orth	hsp-60 (human_orth) ZK550.3	Mentha		hsp-60	P10809	HSPD1	ZK550.3	O62512	THOP1	E	➤
human_orth	pop-1 (human_orth) ard-1	bioGrid		pop-1	Q13015	TCF7L2	ard-1	Q19102	HSD17B10	E	➤
human_orth	pop-1 (human_orth) mrps-11	bioGrid		pop-1	Q13015	TCF7L2	mrps-11	Q23155	MRPS11	E	➤
human_orth	pop-1 (human_orth) mrps-16	bioGrid		pop-1	Q13015	TCF7L2	mrps-16	Q10129	MRPS16	E	➤
human_orth	pop-1 (human_orth) mrps-2	bioGrid		pop-1	Q13015	TCF7L2	mrps-2	O17004	MRPS2	E	➤
human_orth	pop-1 (human_orth) mrps-31	bioGrid		pop-1	Q13015	TCF7L2	mrps-31	Q09261	MRPS31	E	➤
